# Supplementary material for: Conceptual Design of a Generic Data Harmonization Process for OMOP CDM
Source: Preprints.org preprint supplement (doi:10.20944/preprints202311.0104.v1), 2023-11-02
Supplement: Supplementary file 3 [file supplementary]

## Sheet: Title-Abstract-Screening
	20% (26/128) of the publications screened by all three reviewers
Key	Item Type	Publication Year	Author	Title	Publication Title	ISBN	ISSN	DOI	Abstract Note	Date	Pages	Issue	Volume	Decision Reviewer 1 (EH)	Decision Reviewer 2 (FB)	Decision Reviewer 3 (MZ)	Decision final	Exclusion Criteria Reviewer 1 (EH)	Exclusion Criteria Reviewer 2 (FB)	Exclusion Criteria Reviewer 3 (MZ)	Exclusion Criteria final
24KBPBPF	journalArticle	2021	Tan, Eng Hooi; Sena, Anthony G.; Prats-Uribe, Albert; You, Seng Chan; Ahmed, Waheed-Ul-Rahman; Kostka, Kristin; Reich, Christian; Duvall, Scott L.; Lynch, Kristine E.; Matheny, Michael E.; Duarte-Salles, Talita; Bertolin, Sergio Fernandez; Hripcsak, George; Natarajan, Karthik; Falconer, Thomas; Spotnitz, Matthew; Ostropolets, Anna; Blacketer, Clair; Alshammari, Thamir M.; Alghoul, Heba; Alser, Os…	COVID-19 in patients with autoimmune diseases: characteristics and outcomes in a multinational network of cohorts across three countries	Rheumatology (Oxford, England)		1462-0332	10.1093/rheumatology/keab250	OBJECTIVE: Patients with autoimmune diseases were advised to shield to avoid coronavirus disease 2019 (COVID-19), but information on their prognosis is lacking. We characterized 30-day outcomes and mortality after hospitalization with COVID-19 among patients with prevalent autoimmune diseases, and compared outcomes after hospital admissions among similar patients with seasonal influenza. METHODS:…	2021-10-09	SI37-SI50	SI	60	no	no	no	no	usage	no OMOP or OHDSI	no OMOP or OHDSI	no OMOP or OHDSI
2CQZAGBW	journalArticle	2022	Ahmadi, N; Peng, Y; Wolfien, M; Zoch, M; Sedlmayr, M	OMOP CDM Can Facilitate Data-Driven Studies for Cancer Prediction: A Systematic Review	INTERNATIONAL JOURNAL OF MOLECULAR SCIENCES		1422-0067	10.3390/ijms231911834	The current generation of sequencing technologies has led to significant advances in identifying novel disease-associated mutations and generated large amounts of data in a high-throughput manner. Such data in conjunction with clinical routine data are proven to be highly useful in deriving population-level and patient-level predictions, especially in the field of cancer precision medicine. Howev…	2022-10		19	23	no	no	no	no	evaluation	usage	vocabulary	evaluation
2IACS54L	journalArticle	2023	Lamer, Antoine; Moussa, Mouhamed Djahoum; Marcilly, Romaric; Logier, Régis; Vallet, Benoit; Tavernier, Benoît	Development and usage of an anesthesia data warehouse: lessons learnt from a 10-year project	Journal of Clinical Monitoring and Computing		1573-2614	10.1007/s10877-022-00898-y	This paper describes the development and implementation of an anesthesia data warehouse in the Lille University Hospital. We share the lessons learned from a ten-year project and provide guidance for the implementation of such a project. Our clinical data warehouse is mainly fed with data collected by the anesthesia information management system and hospital discharge reports. The data warehouse …	2023-04	461-472	2	37	yes	yes	no	yes			usage
2N4AQQB7	journalArticle	2022	Fortin, Stephen P.; Reps, Jenna; Ryan, Patrick	Adaptation and validation of a coding algorithm for the Charlson Comorbidity Index in administrative claims data using the SNOMED CT standardized vocabulary	BMC medical informatics and decision making		1472-6947	10.1186/s12911-022-02006-1	OBJECTIVES: The Charlson comorbidity index (CCI), the most ubiquitous comorbid risk score, predicts one-year mortality among hospitalized patients and provides a single aggregate measure of patient comorbidity. The Quan adaptation of the CCI revised the CCI coding algorithm for applications to administrative claims data using the International Classification of Diseases (ICD). The purpose of the …	2022-10-07	261	1	22	no	no	no	no	no OMOP or OHDSI	no OMOP or OHDSI	no OMOP or OHDSI	no OMOP or OHDSI
3BTTH73F	journalArticle	2019	Glicksberg, Benjamin S.; Oskotsky, Boris; Thangaraj, Phyllis M.; Giangreco, Nicholas; Badgeley, Marcus A.; Johnson, Kipp W.; Datta, Debajyoti; Rudrapatna, Vivek A.; Rappoport, Nadav; Shervey, Mark M.; Miotto, Riccardo; Goldstein, Theodore C.; Rutenberg, Eugenia; Frazier, Remi; Lee, Nelson; Israni, Sharat; Larsen, Rick; Percha, Bethany; Li, Li; Dudley, Joel T.; Tatonetti, Nicholas P.; Butte, Atul …	PatientExploreR: an extensible application for dynamic visualization of patient clinical history from electronic health records in the OMOP common data model	Bioinformatics (Oxford, England)		1367-4811	10.1093/bioinformatics/btz409	MOTIVATION: Electronic health records (EHRs) are quickly becoming omnipresent in healthcare, but interoperability issues and technical demands limit their use for biomedical and clinical research. Interactive and flexible software that interfaces directly with EHR data structured around a common data model (CDM) could accelerate more EHR-based research by making the data more accessible to resear…	2019-11-01	4515-4518	21	35	no	no	no	no	usage	usage	usage	usage
3HF3VW9X	journalArticle	2020	Ostropolets, Anna; Reich, Christian; Ryan, Patrick; Shang, Ning; Hripcsak, George; Weng, Chunhua	Adapting electronic health records-derived phenotypes to claims data: Lessons learned in using limited clinical data for phenotyping	Journal of Biomedical Informatics		1532-0480	10.1016/j.jbi.2019.103363	Algorithms for identifying patients of interest from observational data must address missing and inaccurate data and are desired to achieve comparable performance on both administrative claims and electronic health records data. However, administrative claims data do not contain the necessary information to develop accurate algorithms for disorders that require laboratory results, and this omissi…	2020-02	103363		102	no	no	no	no	usage	usage	usage	usage
3JE8W8A3	journalArticle	2022	Bardenheuer, K; Van Speybroeck, M; Hague, C; Nikai, E; Price, M	Haematology Outcomes Network in Europe (HONEUR)-A collaborative, interdisciplinary platform to harness the potential of real-world data in hematology	EUROPEAN JOURNAL OF HAEMATOLOGY		0902-4441	10.1111/ejh.13780	Introduction There remains a need to optimize treatments and improve outcomes among patients with hematologic malignancies. The timely synthesis and analysis of real-world data could play a key role. Objectives The Haematology Outcomes Network in Europe (HONEUR) is a federated data network (FDN) that aims to overcome the challenges of heterogenous data collected from different registries, hospita…	2022-08	138-145	2	109	yes	no	no	no		usage	usage	usage
3KBNY8LU	journalArticle	2018	Ta, CN; Dumontier, M; Hripcsak, G; Tatonetti, NP; Weng, CH	Columbia Open Health Data, clinical concept prevalence and co-occurrence from electronic health records	SCIENTIFIC DATA		2052-4463	10.1038/sdata.2018.273	Columbia Open Health Data (COHD) is a publicly accessible database of electronic health record (EHR) prevalence and co-occurrence frequencies between conditions, drugs, procedures, and demographics. COHD was derived from Columbia University Irving Medical Center's Observational Health Data Sciences and Informatics (OHDSI) database. The lifetime dataset, derived from all records, contains 36,578 s…	2018-11-27			5	no	no	no	no	usage	usage	usage	usage
3TNPUXMF	journalArticle	2019	Gruendner, J; Schwachhofer, T; Sippl, P; Wolf, N; Erpenbeck, M; Gulden, C; Kapsner, LA; Zierk, J; Mate, S; Sturzl, M; Croner, R; Prokosch, HU; Toddenroth, D	KETOS: Clinical decision support and machine learning as a service - A training and deployment platform based on Docker, OMOP-CDM, and FHIR Web Services	PLOS ONE		1932-6203	10.1371/journal.pone.0223010	Background and objective To take full advantage of decision support, machine learning, and patient-level prediction models, it is important that models are not only created, but also deployed in a clinical setting. The KETOS platform demonstrated in this work implements a tool for researchers allowing them to perform statistical analyses and deploy resulting models in a secure environment. Method…	2019-10-03		10	14	no	no	no	no	usage	usage	usage	usage
42ADYWW3	journalArticle	2019	Haberson, Andrea; Rinner, Christoph; Gall, Walter	Standardizing Austrians Claims Data Using the OMOP Common Data Model: A Feasibility Study	Studies in Health Technology and Informatics		1879-8365		The suitability of the Observational Medical Outcomes Partnership (OMOP) common data model (CDM) for Austrian pseudonymized claims data from social security institutions and information about hospital stays is evaluated. 1,023 (99.7%) of ATC codes and 3,695 (98.6%) of ICD10 codes coincide with the OMOP vocabulary. Mappings for the local vocabularies like the Austrian pharmaceutical registration n…	2019	151-152		258	yes	yes	yes	yes
45SEV5QZ	conferencePaper	2018	Sharma, H; Mao, CS; Zhang, YZ; Vatani, H; Yao, L; Zhong, YZ; Rasmussen, L; Jiang, GQ; Pathak, J; Luo, Y; IEEE COMP SOC	Portable Phenotyping System A portable machine-learning approach to i2b2 Obesity Challenge	University of Illinois System	2575-2634		10.1109/ICHI-W.2018.00032	This paper presents a portable phenotyping system that is capable of integrating both rule-based and statistical machine learning based approaches. Our system utilizes UMLS to extract clinically relevant features from the unstructured text and then facilitates portability across different institutions and data systems by incorporating ODHSI's OMOP Common Data Model (CDM) to standardize necessary …	2018	86-87			no	no	no	no	usage	usage	usage	usage
4F9LXMQX	conferencePaper	2019	Fajarda, O; Trifan, A; Van Speybroeck, M; Rijnbeek, PR; Oliveira, JL	Exploring the Value of Electronic Health Records from Multiple Datasets	Universidade de Aveiro	1865-0929		10.1007/978-3-030-29196-9_19	During the last decades, most European countries dedicated huge efforts in collecting and maintaining Electronic Health Records (EHR). With the continuous grow of these datasets, it became obvious that its secondary use for research may lead to new insights about diseases and treatments outcomes. EHR databases can be used to speed up and reduce the cost of health research studies, which are essen…	2019	367-383		1024	no	no	no	no	usage	evaluation	usage	usage
4FY6NBGJ	journalArticle	2022	Castano, VG; Spotnitz, M; Waldman, GJ; Joiner, EF; Choi, H; Ostropolets, A; Natarajan, K; McKhann, GM; Ottman, R; Neugut, AI; Hripcsak, G; Youngerman, BE	Identification of patients with drug-resistant epilepsy in electronic medical record data using the Observational Medical Outcomes Partnership Common Data Model	EPILEPSIA		0013-9580	10.1111/epi.17409	Objective More than one third of appropriately treated patients with epilepsy have continued seizures despite two or more medication trials, meeting criteria for drug-resistant epilepsy (DRE). Accurate and reliable identification of patients with DRE in observational data would enable large-scale, real-world comparative effectiveness research and improve access to specialized epilepsy care. In th…	2022-11	2981-2993	11	63	no	no	no	no	usage	usage	usage	usage
575DR4DH	journalArticle	2021	Wang, JQ; Abu-el-Rub, N; Gray, J; Pham, HA; Zhou, YJ; Manion, FJ; Liu, M; Song, X; Xu, H; Rouhizadeh, M; Zhang, YY	COVID-19 SignSym: a fast adaptation of a general clinical NLP tool to identify and normalize COVID-19 signs and symptoms to OMOP common data model	JOURNAL OF THE AMERICAN MEDICAL INFORMATICS ASSOCIATION		1067-5027	10.1093/jamia/ocab015	The COVID-19 pandemic swept across the world rapidly, infecting millions of people. An efficient tool that can accurately recognize important clinical concepts of COVID-19 from free text in electronic health records (EHRs) will be valuable to accelerate COVID-19 clinical research. To this end, this study aims at adapting the existing CLAMP natural language processing tool to quickly build COVID-1…	2021-06	1275-1283	6	28	no	no	no	no	usage	usage	no OMOP or OHDSI	usage
5IL3ZD7B	journalArticle	2021	Sathappan, Selva Muthu Kumaran; Jeon, Young Seok; Dang, Trung Kien; Lim, Su Chi; Shao, Yi-Ming; Tai, E. Shyong; Feng, Mengling	Transformation of Electronic Health Records and Questionnaire Data to OMOP CDM: A Feasibility Study Using SG_T2DM Dataset	Applied Clinical Informatics		1869-0327	10.1055/s-0041-1732301	BACKGROUND: Diabetes mellitus (DM) is an important public health concern in Singapore and places a massive burden on health care spending. Tackling chronic diseases such as DM requires innovative strategies to integrate patients' data from diverse sources and use scientific discovery to inform clinical practice that can help better manage the disease. The Observational Medical Outcomes Partnershi…	2021-08	757-767	4	12	yes	yes	yes	yes
5JZFVY85	journalArticle	2023	Henke, Elisa; Zoch, Michéle; Reinecke, Ines; Spoden, Melissa; Ruhnke, Thomas; Günster, Christian; Sedlmayr, Martin; Bathelt, Franziska	German Claims Data for Real-World Research: Content Coverage Evaluation in OMOP CDM	Studies in Health Technology and Informatics		1879-8365	10.3233/SHTI230053	Research on real-world data is becoming increasingly important. The current restriction to clinical data in Germany limits the view of the patient. To gain comprehensive insights, claims data can be added to the existing knowledge. However, standardized transfer of German claims data into OMOP CDM is currently not possible. In this paper, we conducted an evaluation regarding the coverage of sourc…	2023-05-18			302	no	no	no	no	evaluation	evaluation	evaluation	evaluation
5L89FPNU	journalArticle	2022	Xiao, Guohui; Pfaff, Emily; Prud'hommeaux, Eric; Booth, David; Sharma, Deepak K.; Huo, Nan; Yu, Yue; Zong, Nansu; Ruddy, Kathryn J.; Chute, Christopher G.; Jiang, Guoqian	FHIR-Ontop-OMOP: Building clinical knowledge graphs in FHIR RDF with the OMOP Common data Model	Journal of Biomedical Informatics		1532-0480	10.1016/j.jbi.2022.104201	BACKGROUND: Knowledge graphs (KGs) play a key role to enable explainable artificial intelligence (AI) applications in healthcare. Constructing clinical knowledge graphs (CKGs) against heterogeneous electronic health records (EHRs) has been desired by the research and healthcare AI communities. From the standardization perspective, community-based standards such as the Fast Healthcare Interoperabi…	2022-10	104201		134	no	no	no	no	usage	usage	usage	usage
5TQY32ZJ	conferencePaper	2018	Elkin, PL; Mullin, S; Sakilay, S	Biomedical Informatics Investigator	State University of New York (SUNY) System	0926-9630		10.3233/978-1-61499-921-8-195	The BMI Investigator is a computer human interface built in. Net which allows simultaneous query of structured data such as demographics, administrative codes, medications (coded in RxNorm), laboratory test results (coded in LOINC) and formerly unstructured data in clinical notes (coded in SNOMED CT). The ontology terms identified using SNOMED are all coded as either positive, negative or uncerta…	2018	195-199		255	no	no	no	no	usage	usage	usage	usage
63YDH5Y3	journalArticle	2022	Khera, R; Schuemie, MJ; Lu, Y; Ostropolets, A; Chen, RJ; Hripcsak, G; Ryan, PB; Krumholz, HM; Suchard, MA	Large-scale evidence generation and evaluation across a network of databases for type 2 diabetes mellitus (LEGEND-T2DM): a protocol for a series of multinational, real-world comparative cardiovascular effectiveness and safety studies	BMJ OPEN		2044-6055	10.1136/bmjopen-2021-057977	Introduction Therapeutic options for type 2 diabetes mellitus (T2DM) have expanded over the last decade with the emergence of cardioprotective novel agents, but without such data for older drugs, leaving a critical gap in our understanding of the relative effects of T2DM agents on cardiovascular risk. Methods and analysis The large-scale evidence generations across a network of databases for T2DM…	2022-06		6	12	no	no	no	no	usage	no OMOP or OHDSI	usage	usage
68IF9BCV	journalArticle	2023	Meystre, SM; Heider, PM; Cates, A; Bastian, G; Pittman, T; Gentilin, S; Kelechi, TJ	Piloting an automated clinical trial eligibility surveillance and provider alert system based on artificial intelligence and standard data models	BMC MEDICAL RESEARCH METHODOLOGY		1471-2288	10.1186/s12874-023-01916-6	BackgroundTo advance new therapies into clinical care, clinical trials must recruit enough participants. Yet, many trials fail to do so, leading to delays, early trial termination, and wasted resources. Under-enrolling trials make it impossible to draw conclusions about the efficacy of new therapies. An oft-cited reason for insufficient enrollment is lack of study team and provider awareness abou…	2023-04-11		1	23	no	no	no	no	usage	usage	usage	usage
6M956NXC	journalArticle	2021	Sun, YC; Butler, A; Stewart, LA; Liu, H; Yuan, C; Southard, CT; Kim, JH; Weng, CH	Building an OMOP common data model-compliant annotated corpus for COVID-19 clinical trials	JOURNAL OF BIOMEDICAL INFORMATICS		1532-0464	10.1016/j.jbi.2021.103790	Clinical trials are essential for generating reliable medical evidence, but often suffer from expensive and delayed patient recruitment because the unstructured eligibility criteria description prevents automatic query generation for eligibility screening. In response to the COVID-19 pandemic, many trials have been created but their information is not computable. We included 700 COVID-19 trials a…	2021-06			118	no	no	no	no	usage	extension	usage	usage
7DC9CWJR	conferencePaper	2019	Shin, SJ; You, SC; Roh, J; Park, YR; Park, RW	Genomic Common Data Model for Biomedical Data in Clinical Practice	Ajou University	0926-9630		10.3233/SHT1190676	A common data model for clinical NGS panel data that is used in a distributed research network to achieve large scale to make evidence for improving patient care should be developed. This study developed OMOP-CDM extension for NGS panel data and confirmed the feasibility of the model by finding the differences between a database generated by research purpose and clinical practice. We believe this…	2019	1843-1844		264	yes	no	no	no		extension	extension	extension
7DPQQSIW	journalArticle	2019	Reps, Jenna M.; Rijnbeek, Peter R.; Ryan, Patrick B.	Supplementing claims data analysis using self-reported data to develop a probabilistic phenotype model for current smoking status	Journal of Biomedical Informatics		1532-0480	10.1016/j.jbi.2019.103264	OBJECTIVES: Smoking status is poorly record in US claims data. IBM MarketScan Commercial is a claims database that can be linked to an additional health risk assessment with self-reported smoking status for a subset of 1,966,174 patients. We investigate whether this subset could be used to learn a smoking status phenotype model generalizable to all US claims data that calculates the probability o…	2019-09	103264		97	no	no	no	no	usage	usage	usage	usage
7HQIP4UT	journalArticle	2020	Syed, Shorabuddin; Baghal, Ahmad; Prior, Fred; Zozus, Meredith; Al-Shukri, Shaymaa; Syeda, Hafsa Bareen; Garza, Maryam; Begum, Salma; Gates, Kim; Syed, Mahanazuddin; Sexton, Kevin W.	Toolkit to Compute Time-Based Elixhauser Comorbidity Indices and Extension to Common Data Models	Healthcare Informatics Research		2093-3681	10.4258/hir.2020.26.3.193	OBJECTIVE: The time-dependent study of comorbidities provides insight into disease progression and trajectory. We hypothesize that understanding longitudinal disease characteristics can lead to more timely intervention and improve clinical outcomes. As a first step, we developed an efficient and easy-to-install toolkit, the Time-based Elixhauser Comorbidity Index (TECI), which pre-calculates time…	2020-07	193-200	3	26	no	no	no	no	usage	usage	usage	usage
7LQLXSSG	journalArticle	2020	Ji, H; Kim, S; Yi, S; Hwang, H; Kim, JW; Yoo, S	Converting clinical document architecture documents to the common data model for incorporating health information exchange data in observational health studies: CDA to CDM	JOURNAL OF BIOMEDICAL INFORMATICS		1532-0464	10.1016/j.jbi.2020.103459	Background: Utilization of standard health information exchange (HIE) data is growing due to the high adoption rate and interoperability of electronic health record (EHR) systems. However, integration of HIE data into an EHR system is not yet fully adopted in clinical research. In addition, data quality should be verified for the secondary use of these data. Thus, the aims of this study were to c…	2020-07			107	yes	yes	yes	yes
7Z3HM7ZZ	journalArticle	2022	Bradwell, KR; Wooldridge, JT; Amor, B; Bennett, TD; Anand, A; Bremer, C; Yoo, YJ; Qian, ZL; Johnson, SG; Pfaff, ER; Girvin, AT; Manna, A; Niehaus, EA; Hong, SS; Zhang, XT; Zhu, RL; Bissell, M; Qureshi, N; Saltz, J; Haendel, MA; Chute, CG; Lehmann, HP; Moffitt, RA; N3C Consortium	Harmonizing units and values of quantitative data elements in a very large nationally pooled electronic health record (EHR) dataset	JOURNAL OF THE AMERICAN MEDICAL INFORMATICS ASSOCIATION		1067-5027	10.1093/jamia/ocac054	Objective The goals of this study were to harmonize data from electronic health records (EHRs) into common units, and impute units that were missing. Materials and Methods The National COVID Cohort Collaborative (N3C) table of laboratory measurement data-over 3.1 billion patient records and over 19 000 unique measurement concepts in the Observational Medical Outcomes Partnership (OMOP) common-dat…	2022-06-14	1172-1182	7	29	yes	yes	yes	yes
895EVYA3	journalArticle	2021	Lenert, Leslie A.; Ilatovskiy, Andrey V.; Agnew, James; Rudisill, Patricia; Jacobs, Jeff; Weatherston, Duncan; Deans, Kenneth R.	Automated production of research data marts from a canonical fast healthcare interoperability resource data repository: applications to COVID-19 research	Journal of the American Medical Informatics Association: JAMIA		1527-974X	10.1093/jamia/ocab108	OBJECTIVE: The rapidly evolving COVID-19 pandemic has created a need for timely data from the healthcare systems for research. To meet this need, several large new data consortia have been developed that require frequent updating and sharing of electronic health record (EHR) data in different common data models (CDMs) to create multi-institutional databases for research. Traditionally, each CDM h…	2021-07-30	1605-1611	8	28	yes	yes	-	yes	-	-	-	-
8B8X9PTD	journalArticle	2022	Prieto-Alhambra, D; Kostka, K; Duarte-Salles, T; Prats-Uribe, A; Sena, A; Pistillo, A; Khalid, S; Lai, LN; Golozar, A; Alshammari, TM; Dawoud, D; Nyberg, F; Wilcox, A; Andryc, A; Williams, A; Ostropolets, A; Areia, C; Jung, CY; Harle, C; Reich, C; Blacketer, C; Morales, D; Dorr, DA; Burn, E; Roel, E; Tan, EH; Minty, E; DeFalco, F; de Maeztu, G; Lipori, G; Alghoul, H; Zhu, H; Thomas, J; Bian, J; P…	Unraveling COVID-19: A Large-Scale Characterization of 4.5 Million COVID-19 Cases Using CHARYBDIS	CLINICAL EPIDEMIOLOGY		1179-1349	10.2147/CLEP.S323292	Purpose: Routinely collected real world data (RWD) have great utility in aiding the novel coronavirus disease (COVID-19) pandemic response. Here we present the international Observational Health Data Sciences and Informatics (OHDSI) Characterizing Health Associated Risks and Your Baseline Disease In SARS-COV-2 (CHARYBDIS) framework for standardisation and analysis of COVID19 RWD. Patients and Met…	2022	369-384		14	no	-	no	no	usage	-	usage	usage
8MRC9EVS	journalArticle	2021	Oh, S; Sung, MD; Rhee, Y; Hong, N; Park, YR	Evaluation of the Privacy Risks of Personal Health Identifiers and Quasi-Identifiers in a Distributed Research Network: Development and Validation Study	JMIR MEDICAL INFORMATICS		2291-9694	10.2196/24940	Background: Privacy should be protected in medical data that include patient information. A distributed research network (DRN) is one of the challenges in privacy protection and in the encouragement of multi-institutional clinical research. A DRN standardizes multi-institutional data into a common structure and terminology called a common data model (CDM), and it only shares analysis results. It …	2021-05		5	9	no	-	no	no	evaluation	-	evaluation	evaluation
8TM7NJ3X	journalArticle	2021	Nestsiarovich, A; Reps, JM; Matheny, ME; DuVall, SL; Lynch, KE; Beaton, M; Jiang, XZ; Spotnitz, M; Pfohl, SR; Shah, NH; Torre, CO; Reich, CG; Lee, DY; Son, SJ; You, SC; Park, RW; Ryan, PB; Lambert, CG	Predictors of diagnostic transition from major depressive disorder to bipolar disorder: a retrospective observational network study	TRANSLATIONAL PSYCHIATRY		2158-3188	10.1038/s41398-021-01760-6	Many patients with bipolar disorder (BD) are initially misdiagnosed with major depressive disorder (MDD) and are treated with antidepressants, whose potential iatrogenic effects are widely discussed. It is unknown whether MDD is a comorbidity of BD or its earlier stage, and no consensus exists on individual conversion predictors, delaying BD's timely recognition and treatment. We aimed to build a…	2021-12-20		1	11	no	-	no	no	usage	-	usage	usage
8U3N9RTN	journalArticle	2021	Recalde, Martina; Roel, Elena; Pistillo, Andrea; Sena, Anthony G.; Prats-Uribe, Albert; Ahmed, Waheed-Ul-Rahman; Alghoul, Heba; Alshammari, Thamir M.; Alser, Osaid; Areia, Carlos; Burn, Edward; Casajust, Paula; Dawoud, Dalia; DuVall, Scott L.; Falconer, Thomas; Fernández-Bertolín, Sergio; Golozar, Asieh; Gong, Mengchun; Lai, Lana Yin Hui; Lane, Jennifer C. E.; Lynch, Kristine E.; Matheny, Michael…	Characteristics and outcomes of 627 044 COVID-19 patients living with and without obesity in the United States, Spain, and the United Kingdom	International Journal of Obesity (2005)		1476-5497	10.1038/s41366-021-00893-4	BACKGROUND: A detailed characterization of patients with COVID-19 living with obesity has not yet been undertaken. We aimed to describe and compare the demographics, medical conditions, and outcomes of COVID-19 patients living with obesity (PLWO) to those of patients living without obesity. METHODS: We conducted a cohort study based on outpatient/inpatient care and claims data from January to Jun…	2021-11	2347-2357	11	45	no	-	no	no	usage	-	usage	usage
9CU7WD9R	journalArticle	2022	Kim, Tae-Hoon; Noh, SiHyeong; Kim, Youe Ree; Lee, ChungSub; Kim, Ji Eon; Jeong, Chang-Won; Yoon, Kwon-Ha	Development and validation of a management system and dataset quality assessment tool for the Radiology Common Data Model (R_CDM): A case study in liver disease	International Journal of Medical Informatics		1872-8243	10.1016/j.ijmedinf.2022.104759	BACKGROUND: The Observational Medical Outcomes Partnership-Common Data Model (OMOP-CDM), a distributed research network, has low clinical data coverage. Radiological data are valuable, but imaging metadata are often incomplete, and a standardized recording format in the OMOP-CDM is lacking. We developed a web-based management system and data quality assessment (RQA) tool for a radiology_CDM (R_CD…	2022-04-01	104759		162	yes	yes	-	yes	-	-	-	-
9DTEY5T2	journalArticle	2021	Blacketer, C; Voss, EA; DeFalco, F; Hughes, N; Schuemie, MJ; Moinat, M; Rijnbeek, PR	Using the Data Quality Dashboard to Improve the EHDEN Network	APPLIED SCIENCES-BASEL		2076-3417	10.3390/app112411920	Federated networks of observational health databases have the potential to be a rich resource to inform clinical practice and regulatory decision making. However, the lack of standard data quality processes makes it difficult to know if these data are research ready. The EHDEN COVID-19 Rapid Collaboration Call presented the opportunity to assess how the newly developed open-source tool Data Quali…	2021-12		24	11	yes	yes	-	yes	-	-	-	-
9JKT3D3Z	journalArticle	2021	Majeed, Raphael W.; Fischer, Patrick; Günther, Andreas	Accessing OMOP Common Data Model Repositories with the i2b2 Webclient - Algorithm for Automatic Query Translation	Studies in Health Technology and Informatics		1879-8365	10.3233/SHTI210077	In the era of translational research, data integration and clinical data warehouses are important enabling technologies for clinical researchers. The OMOP common data model is a wide-spread choice as a target for data integration in medical informatics. It's portability of queries and analyses across different institutions and data are ideal also from the viewpoint of the FAIR principles. Yet, th…	2021-05-24	251-259		278	no	-	no	no	usage	-	evaluation	usage
9JLDRXYQ	journalArticle	2023	Yu, Y; Jiang, GQ; Brandt, E; Forsyth, T; Dhruva, SS; Zhang, SM; Chen, JJ; Noseworthy, PA; Doshi, AA; Collison-Farr, K; Kim, D; Ross, JS; Coplan, PM; Drozda, JP	Integrating real-world data to assess cardiac ablation device outcomes in a multicenter study using the OMOP common data model for regulatory decisions: implementation and evaluation	JAMIA OPEN		2574-2531	10.1093/jamiaopen/ooac108	The objective of this study is to describe application of the Observational Medical Outcomes Partnership (OMOP) common data model (CDM) to support medical device real-world evaluation in a National Evaluation System for health Technology Coordinating Center (NESTcc) Test-Case involving 2 healthcare systems, Mercy Health and Mayo Clinic. CDM implementation was coordinated across 2 healthcare syste…	2023-01-06		1	6	yes	yes	-	yes	-	-	-	-
9ZZQI7CV	journalArticle	2020	Unberath, Philipp; Prokosch, Hans Ulrich; Gründner, Julian; Erpenbeck, Marcel; Maier, Christian; Christoph, Jan	EHR-Independent Predictive Decision Support Architecture Based on OMOP	Applied Clinical Informatics		1869-0327	10.1055/s-0040-1710393	BACKGROUND: The increasing availability of molecular and clinical data of cancer patients combined with novel machine learning techniques has the potential to enhance clinical decision support, example, for assessing a patient's relapse risk. While these prediction models often produce promising results, a deployment in clinical settings is rarely pursued. OBJECTIVES: In this study, we demonstrat…	2020-05	399-404	3	11	no	-	no	no	usage	-	usage	usage
A2R9BX6F	journalArticle	2020	Michael, Chelsea L.; Sholle, Evan T.; Wulff, Regina T.; Roboz, Gail J.; Campion, Thomas R.	Mapping Local Biospecimen Records to the OMOP Common Data Model	AMIA Joint Summits on Translational Science proceedings. AMIA Joint Summits on Translational Science		2153-4063		Research to support precision medicine for leukemia patients requires integration of biospecimen and clinical data. The Observational Medical Outcomes Partnership common data model (OMOP CDM) and its Specimen table presents a potential solution. Although researchers have described progress and challenges in mapping electronic health record (EHR) data to populate the OMOP CDM, to our knowledge no …	2020	422-429		2020	yes	yes	-	yes	-	-	-	-
A4EYA9JN	journalArticle	2018	Sun, Y. X.; Pei, Z. C.; Zhan, S. Y.	Data harmonization and sharing in study cohorts of respiratory diseases	Zhonghua Liu Xing Bing Xue Za Zhi = Zhonghua Liuxingbingxue Zazhi		0254-6450	10.3760/cma.j.issn.0254-6450.2018.02.019	Objective: Chronic obstructive pulmonary disease, asthma, interstitial lung disease and pulmonary thromboembolism are the most common and severe respiratory diseases, which seriously jeopardizing the health of the Chinese citizens. Large-scale prospective cohort studies are needed to explore the relationships between potential risk factors and respiratory disease outcomes and to observe disease p…	2018-02-10	233-239	2	39	no	-	yes	no	evaluation	-	-	evaluation
ANGM39TT	journalArticle	2020	Yu, Yue; Ruddy, Kathryn J.; Wen, Andrew; Zong, Nansu; Tsuji, Shintaro; Chen, Jun; Shah, Nilay D.; Jiang, Guoqian	Integrating Electronic Health Record Data into the ADEpedia-on-OHDSI Platform for Improved Signal Detection: A Case Study of Immune-related Adverse Events	AMIA Joint Summits on Translational Science proceedings. AMIA Joint Summits on Translational Science		2153-4063		With widespread adoption of electronic health records (EHRs), Real World Data and Real World Evidence (RWE) have been increasingly used by FDA for evaluating drug safety and effectiveness. However, integration of heterogeneous drug safety data sources and systems remains an impediment for effective pharmacovigilance studies. In an ongoing project, we have developed a next generation pharmacovigil…	2020	710-719		2020	yes	yes	-	yes	-	-	-	-
ARXZZ5MD	journalArticle	2019	Sharma, H; Mao, CS; Zhang, YZ; Vatani, H; Yao, L; Zhong, YZ; Rasmussen, L; Jiang, GQ; Pathak, J; Luo, Y	Developing a portable natural language processing based phenotyping system	BMC MEDICAL INFORMATICS AND DECISION MAKING		1472-6947	10.1186/s12911-019-0786-z	BackgroundThis paper presents a portable phenotyping system that is capable of integrating both rule-based and statistical machine learning based approaches.MethodsOur system utilizes UMLS to extract clinically relevant features from the unstructured text and then facilitates portability across different institutions and data systems by incorporating OHDSI's OMOP Common Data Model (CDM) to standa…	2019-04-04			19	no	-	no	no	usage	-	usage	usage
B7MZR6GA	conferencePaper	2018	Zhao, YQ; Wang, YS; Wang, H; Yan, B; Shen, FC; Peterson, KJ; Rocca, WA; St Sauver, J; Liu, HF	Annotating Cohort Data Elements with OHDSI Common Data Model to Promote Research Reproducibility	Mayo Clinic	2156-1125			Rapid increase in the implementation of electronic health records (EHRs) has led to an unprecedented expansion in the availability of dense longitudinal cohort datasets for clinical studies. However, there is a growing need to ensure data traceability, validity, and reproducibility for EHR-based clinical research. Applying common data models that standardize EHR data elements could reduce researc…	2018	1310-1317			no	-	no	no	evaluation	-	evaluation	evaluation
BFQZS9EE	journalArticle	2021	Wood, WA; Marks, P; Plovnick, RM; Hewitt, K; Neuberg, DS; Walters, S; Dolan, BK; Tucker, EA; Abrams, CS; Thompson, AA; Anderson, KC; Kluetz, P; Farrell, A; Rivera, D; Gertzog, M; Pappas, G	ASH Research Collaborative: a real-world data infrastructure to support real-world evidence development and learning healthcare systems in hematology	BLOOD ADVANCES		2473-9529	10.1182/bloodadvances.2021005902	The ASH Research Collaborative is a nonprofit organization established through the American Society of Hematology's commitment to patients with hematologic conditions and the science that informs clinical care and future therapies. The ASH Research Collaborative houses 2 major initiatives: (1) the Data Hub and (2) the Clinical Trials Network (CTN). The Data Hub is a program for hematologic diseas…	2021-12-14	5429-5438	23	5	no	-	no	no	usage	-	usage	usage
BXRRU3AD	conferencePaper	2018	Liyanage, H; Liaw, ST; Jonnagaddala, J; Hinton, W; de Lusignan, S	Common Data Models (CDMs) to Enhance International Big Data Analytics: A Diabetes Use Case to Compare Three CDMs	University of Surrey	0926-9630		10.3233/978-1-61499-921-8-60	Common data models (CDM) have enabled the simultaneous analysis of disparate and large data sources. A literature review identified three relevant CDMs: The Observational Medical Outcomes Partnership (OMOP) was the most cited; next the Sentinel; and then the Patient Centered Outcomes Research Institute (PCORI). We tested these three CDMs with fifteen pre-defined criteria for a diabetes cohort stu…	2018	60-64		255	yes	no	-	no	-	evaluation	-	evaluation
BZMCF6I6	journalArticle	2018	Vashisht, Rohit; Jung, Kenneth; Schuler, Alejandro; Banda, Juan M.; Park, Rae Woong; Jin, Sanghyung; Li, Li; Dudley, Joel T.; Johnson, Kipp W.; Shervey, Mark M.; Xu, Hua; Wu, Yonghui; Natrajan, Karthik; Hripcsak, George; Jin, Peng; Van Zandt, Mui; Reckard, Anthony; Reich, Christian G.; Weaver, James; Schuemie, Martijn J.; Ryan, Patrick B.; Callahan, Alison; Shah, Nigam H.	Association of Hemoglobin A1c Levels With Use of Sulfonylureas, Dipeptidyl Peptidase 4 Inhibitors, and Thiazolidinediones in Patients With Type 2 Diabetes Treated With Metformin: Analysis From the Observational Health Data Sciences and Informatics Initiative	JAMA network open		2574-3805	10.1001/jamanetworkopen.2018.1755	IMPORTANCE: Consensus around an efficient second-line treatment option for type 2 diabetes (T2D) remains ambiguous. The availability of electronic medical records and insurance claims data, which capture routine medical practice, accessed via the Observational Health Data Sciences and Informatics network presents an opportunity to generate evidence for the effectiveness of second-line treatments.…	2018-08-03	e181755	4	1	no	-	no	no	usage	-	usage	usage
CEGA9JJB	journalArticle	2018	Rinner, Christoph; Gezgin, Deniz; Wendl, Christopher; Gall, Walter	A Clinical Data Warehouse Based on OMOP and i2b2 for Austrian Health Claims Data	Studies in Health Technology and Informatics		1879-8365		BACKGROUND: To develop simulation models for healthcare related questions clinical data can be reused. OBJECTIVES: Develop a clinical data warehouse to harmonize different data sources in a standardized manner and get a reproducible interface for clinical data reuse. METHODS: The Kimball life cycle for the development of data warehouse was used. The development is split into the technical, the da…	2018	94-99		248	yes	yes	-	yes	-	-	-	-
CS38VDGW	journalArticle	2023	Kim, Y; Seo, SI; Lee, KJ; Kim, J; Yoo, JJ; Seo, WW; Shin, WG	Risks of long-term use of proton pump inhibitor on ischemic vascular events: A distributed network analysis of 5 real-world observational Korean databases using a common data model	INTERNATIONAL JOURNAL OF STROKE		1747-4930	10.1177/17474930221133219	Background: Proton pump inhibitors (PPIs) are frequently prescribed drugs. However, it has been suggested that they are associated with an increased risk of ischemic vascular events (IVE) including stroke, although the data are inconsistent. Aims: We investigated the association between PPIs use and IVE in five observational Korean databases using a common data model (CDM). Methods: This study in…	2023-06	590-598	5	18	no	-	no	no	usage	-	usage	usage
D4K9WZ5L	journalArticle	2023	Kanbar, LJ; Dexheimer, JW; Zahner, J; Burrows, EK; Chatburn, R; Messinger, A; Baker, CD; Schuler, CL; Benscoter, D; Amin, R; Pajor, N	Standardizing electronic health record ventilation data in the pediatric long-term mechanical ventilator-dependent population	PEDIATRIC PULMONOLOGY		8755-6863	10.1002/ppul.26204	Background Sharing data across institutions is critical to improving care for children who are using long-term mechanical ventilation (LTMV). Mechanical ventilation data are complex and poorly standardized. This lack of data standardization is a major barrier to data sharing. Objective We aimed to describe current ventilator data in the electronic health record (EHR) and propose a framework for s…	2023-02	433-440	2	58	yes	yes	-	yes	-	-	-	-
D5YVSZL4	journalArticle	2019	Lynch, KE; Deppen, SA; DuVall, SL; Viernes, B; Cao, AZ; Park, D; Hanchrow, E; Hewa, K; Greaves, P; Matheny, ME	Incrementally Transforming Electronic Medical Records into the Observational Medical Outcomes Partnership Common Data Model: A Multidimensional Quality Assurance Approach	APPLIED CLINICAL INFORMATICS		1869-0327	10.1055/s-0039-1697598	Background The development and adoption of health care common data models (CDMs) has addressed some of the logistical challenges of performing research on data generated from disparate health care systems by standardizing data representations and leveraging standardized terminology to express clinical information consistently. However, transforming a data system into a CDM is not a trivial task, …	2019-10	794-803	5	10	yes	yes	-	yes	-	-	-	-
D94GNL95	journalArticle	2020	Wang, Q; Reps, JM; Kostka, KF; Ryan, PB; Zou, YH; Voss, EA; Rijnbeek, PR; Chen, RJ; Rao, GA; Stewart, HM; Williams, AE; Williams, RD; Van Zandt, M; Falconer, T; Fernandez-Chas, M; Vashisht, R; Pfohl, SR; Shah, NH; Kasthurirathne, SN; You, SC; Jiang, Q; Reich, C; Zhou, Y	Development and validation of a prognostic model predicting symptomatic hemorrhagic transformation in acute ischemic stroke at scale in the OHDSI network	PLOS ONE		1932-6203	10.1371/journal.pone.0226718	Background and purpose Hemorrhagic transformation (HT) after cerebral infarction is a complex and multifactorial phenomenon in the acute stage of ischemic stroke, and often results in a poor prognosis. Thus, identifying risk factors and making an early prediction of HT in acute cerebral infarction contributes not only to the selections of therapeutic regimen but also, more importantly, to the imp…	2020-08-07		1	15	no	-	no	no	usage	-	usage	usage
DEGJ8YBP	journalArticle	2020	Jeon, Seungho; Seo, Jeongeun; Kim, Sukyoung; Lee, Jeongmoon; Kim, Jong-Ho; Sohn, Jang Wook; Moon, Jongsub; Joo, Hyung Joon	Proposal and Assessment of a De-Identification Strategy to Enhance Anonymity of the Observational Medical Outcomes Partnership Common Data Model (OMOP-CDM) in a Public Cloud-Computing Environment: Anonymization of Medical Data Using Privacy Models	Journal of Medical Internet Research		1438-8871	10.2196/19597	BACKGROUND: De-identifying personal information is critical when using personal health data for secondary research. The Observational Medical Outcomes Partnership Common Data Model (CDM), defined by the nonprofit organization Observational Health Data Sciences and Informatics, has been gaining attention for its use in the analysis of patient-level clinical data obtained from various medical insti…	2020-11-26	e19597	11	22	no	-	no	no	evaluation	-	evaluation	evaluation
DKJ6FW4S	journalArticle	2022	Marteau, Benoit L.; Zhu, Yuanda; Giuste, Felipe; Shi, Wenqi; Carpenter, Ashley; Hilton, Coleman; Wang, May D.	Accelerating Multi-site Health Informatics with Streamlined Data Infrastructure using OMOP-on-FHIR	Annual International Conference of the IEEE Engineering in Medicine and Biology Society. IEEE Engineering in Medicine and Biology Society. Annual International Conference		2694-0604	10.1109/EMBC48229.2022.9871865	Shriners Children's (SHC) is a hospital system whose mission is to advance the treatment and research of pediatric diseases. SHC success has generated a wealth of clinical data. Unfortunately, barriers to healthcare data access often limit data-driven clinical research. We decreased this burden by allowing access to clinical data via the standardized data access standard called FHIR (Fast Healthc…	2022-07	4687-4690		2022	no	-	yes	no	usage	-	-	usage
E3EJAMIK	journalArticle	2021	Gaudet-Blavignac, Christophe; Raisaro, Jean Louis; Touré, Vasundra; Österle, Sabine; Crameri, Katrin; Lovis, Christian	A National, Semantic-Driven, Three-Pillar Strategy to Enable Health Data Secondary Usage Interoperability for Research Within the Swiss Personalized Health Network: Methodological Study	JMIR medical informatics		2291-9694	10.2196/27591	BACKGROUND: Interoperability is a well-known challenge in medical informatics. Current trends in interoperability have moved from a data model technocentric approach to sustainable semantics, formal descriptive languages, and processes. Despite many initiatives and investments for decades, the interoperability challenge remains crucial. The need for data sharing for most purposes ranging from pat…	2021-06-24	e27591	6	9	no	-	yes	yes	evaluation	-	-	-
EQTAAYR2	journalArticle	2020	Fischer, Patrick; Stöhr, Mark R.; Gall, Henning; Michel-Backofen, Achim; Majeed, Raphael W.	Data Integration into OMOP CDM for Heterogeneous Clinical Data Collections via HL7 FHIR Bundles and XSLT	Studies in Health Technology and Informatics		1879-8365	10.3233/SHTI200138	Data integration is an important task in medical informatics and highly impacts the gain out of existing health information data. These tasks are using implemented as extract transform and load processes. By introducing HL7 FHIR as an intermediate format, our aim was to integrate heterogeneous data from a German pulmonary hypertension registry into an OMOP Common Data Model. First, domain knowled…	2020-06-16	138-142		270	no	-	no	no	wrong type of source data	-	wrong type of source data	wrong type of source data
F3CY5HQF	journalArticle	2023	Cremonesi, F; Planat, V; Kalokyri, V; Kondylakis, H; Sanavia, T; Resinas, VMM; Singh, B; Uribe, S	The need for multimodal health data modeling: A practical approach for a federated-learning healthcare platform	JOURNAL OF BIOMEDICAL INFORMATICS		1532-0464	10.1016/j.jbi.2023.104338	Federated learning initiatives in healthcare are being developed to collaboratively train predictive models without the need to centralize sensitive personal data. GenoMed4All is one such project, with the goal of connecting European clinical and -omics data repositories on rare diseases through a federated learning platform. Currently, the consortium faces the challenge of a lack of well-establi…	2023-05			141	yes	no	-	no	-	evaluation	-	evaluation
FEQI3J47	journalArticle	2023	Callahan, TJ; Stefanski, AL; Wyrwa, JM; Zeng, CJ; Ostropolets, A; Banda, JM; Baumgartner, WA; Boyce, RD; Casiraghi, E; Coleman, B; Collins, JH; Davies, SDJ; Feinstein, JA; Lin, AY; Martin, B; Matentzoglu, NA; Meeker, D; Reese, J; Sinclair, J; Taneja, SB; Trinkley, KE; Vasilevsky, NA; Williams, AE; Zhang, XMA; Denny, JC; Ryan, PB; Hripcsak, G; Bennett, TD; Haendel, MA; Robinson, PN; Hunter, LE; Ka…	Ontologizing health systems data at scale: making translational discovery a reality	NPJ DIGITAL MEDICINE		2398-6352	10.1038/s41746-023-00830-x	Common data models solve many challenges of standardizing electronic health record (EHR) data but are unable to semantically integrate all of the resources needed for deep phenotyping. Open Biological and Biomedical Ontology (OBO) Foundry ontologies provide computable representations of biological knowledge and enable the integration of heterogeneous data. However, mapping EHR data to OBO ontolog…	2023-05-19		1	6	no	-	yes	no	vocabulary	-	-	vocabulary
FPXNJEN9	journalArticle	2020	Dixon, BE; Wen, C; French, T; Williams, JL; Duke, JD; Grannis, SJ	Extending an open-source tool to measure data quality: case report on Observational Health Data Science and Informatics (OHDSI)	BMJ HEALTH & CARE INFORMATICS		2632-1009	10.1136/bmjhci-2019-100054	Introduction As the health system seeks to leverage large-scale data to inform population outcomes, the informatics community is developing tools for analysing these data. To support data quality assessment within such a tool, we extended the open-source software Observational Health Data Sciences and Informatics (OHDSI) to incorporate new functions useful for population health. Methods We develo…	2020-07		1	27	no	-	no	no	extension	-	extension	extension
FWUUNWGQ	journalArticle	2023	Dimitriadis, Vlasios; Chytas, Achilleas; Grammatikopoulou, Margarita; Nikolaidis, George; Pliatsika, Jenny; Zachariadou, Martha; Nikolopoulos, Spiros; Natsiavas, Pantelis	Use of Real-World Data to Support Adverse Drug Reactions Prevention During ePrescription	Studies in Health Technology and Informatics		1879-8365	10.3233/SHTI230469	Adverse Drug Reactions (ADRs) are a crucial public health issue due to the significant health and monetary burden that they can impose. Real-World Data (RWD), e.g., Electronic Health Records, claims data, etc., can support the identification of potentially unknown ADRs and thus, they could provide raw data to mine ADR prevention rules. The PrescIT project aims to create a Clinical Decision Suppor…	2023-06-29	226-229		305	no	-	no	no	usage	-	usage	usage
G9HZE4QX	journalArticle	2019	Meystre, Stéphane M.; Heider, Paul M.; Kim, Youngjun; Aruch, Daniel B.; Britten, Carolyn D.	Automatic trial eligibility surveillance based on unstructured clinical data	International Journal of Medical Informatics		1872-8243	10.1016/j.ijmedinf.2019.05.018	INTRODUCTION: Insufficient patient enrollment in clinical trials remains a serious and costly problem and is often considered the most critical issue to solve for the clinical trials community. In this project, we assessed the feasibility of automatically detecting a patient's eligibility for a sample of breast cancer clinical trials by mapping coded clinical trial eligibility criteria to the cor…	2019-09	13-19		129	no	-	no	no	usage	-	usage	usage
H4WFH4LE	journalArticle	2023	Frid, Santiago; Pastor Duran, Xavier; Bracons Cucó, Guillem; Pedrera-Jiménez, Miguel; Serrano-Balazote, Pablo; Muñoz Carrero, Adolfo; Lozano-Rubí, Raimundo	An Ontology-Based Approach for Consolidating Patient Data Standardized With European Norm/International Organization for Standardization 13606 (EN/ISO 13606) Into Joint Observational Medical Outcomes Partnership (OMOP) Repositories: Description of a Methodology	JMIR medical informatics		2291-9694	10.2196/44547	BACKGROUND: To discover new knowledge from data, they must be correct and in a consistent format. OntoCR, a clinical repository developed at Hospital Clínic de Barcelona, uses ontologies to represent clinical knowledge and map locally defined variables to health information standards and common data models. OBJECTIVE: The aim of the study is to design and implement a scalable methodology based on…	2023-03-08	e44547		11	no	-	yes	yes	usage	-	-	-
H84NBGM3	journalArticle	2019	Daniel, Christel; Kalra, Dipak; Section Editors for the IMIA Yearbook Section on Clinical Research Informatics	Clinical Research Informatics: Contributions from 2018	Yearbook of Medical Informatics		2364-0502	10.1055/s-0039-1677921	OBJECTIVES: To summarize key contributions to current research in the field of Clinical Research Informatics (CRI) and to select best papers published in 2018. METHOD: A bibliographic search using a combination of MeSH descriptors and free-text terms on CRI was performed using PubMed, followed by a double-blind review in order to select a list of candidate best papers to be then peer-reviewed by …	2019-08	203-205	1	28	no	-	no	no	evaluation	-	mentioned	mentioned
HPGCUZKE	journalArticle	2023	Oniani, David; Parmanto, Bambang; Saptono, Andi; Bove, Allyn; Freburger, Janet; Visweswaran, Shyam; Cappella, Nickie; McLay, Brian; Silverstein, Jonathan C.; Becich, Michael J.; Delitto, Anthony; Skidmore, Elizabeth; Wang, Yanshan	ReDWINE: A clinical datamart with text analytical capabilities to facilitate rehabilitation research	International Journal of Medical Informatics		1872-8243	10.1016/j.ijmedinf.2023.105144	Rehabilitation research focuses on determining the components of a treatment intervention, the mechanism of how these components lead to recovery and rehabilitation, and ultimately the optimal intervention strategies to maximize patients' physical, psychologic, and social functioning. Traditional randomized clinical trials that study and establish new interventions face challenges, such as high c…	2023-07-11	105144		177	yes	yes	-	yes	-	-	-	-
HSHAK228	journalArticle	2022	Zhou, JJ; Guo, CW; Ren, L; Zhu, DD; Zhen, WF; Zhang, SN; Zhang, QE	Gender differences in outpatients with dementia from a large psychiatric hospital in China	BMC PSYCHIATRY		1471-244X	10.1186/s12888-022-03852-z	Background The sociodemographic characteristics and clinical features of dementia patients in psychiatric hospitals have not been thoroughly studied in China. This study aimed to explore the psychiatric outpatient attendance of dementia patients at a psychiatric hospital in China, with particular emphasis on gender differences. Methods This retrospective study examined outpatients with dementia f…	2022-03-21		1	22	no	-	no	no	usage	-	usage	usage
IEMIP9IQ	journalArticle	2022	Wang, X; Rao, WW; Chen, XY; Zhang, XQ; Wang, Z; Ma, XL; Zhang, QG	The sociodemographic characteristics and clinical features of the late-life depression patients: results from the Beijing Anding Hospital mental health big data platform	BMC PSYCHIATRY		1471-244X	10.1186/s12888-022-04339-7	Background The sociodemographic characteristics and clinical features of the Late-life depression (LLD) patients in psychiatric hospitals have not been thoroughly studied in China. This study aimed to explore the psychiatric outpatient attendance of LLD patients at a psychiatric hospital in China, with a subgroup analysis, such as with or without anxiety, gender differences. Methods This retrospe…	2022-11-02		1	22	no	-	no	no	usage	-	usage	usage
IFZE5A3Y	journalArticle	2019	Reps, Jenna M.; Rijnbeek, Peter R.; Ryan, Patrick B.	Identifying the DEAD: Development and Validation of a Patient-Level Model to Predict Death Status in Population-Level Claims Data	Drug Safety		1179-1942	10.1007/s40264-019-00827-0	INTRODUCTION: US claims data contain medical data on large heterogeneous populations and are excellent sources for medical research. Some claims data do not contain complete death records, limiting their use for mortality or mortality-related studies. A model to predict whether a patient died at the end of the follow-up time (referred to as the end of observation) is needed to enable mortality-re…	2019-11	1377-1386	11	42	no	-	no	no	usage	-	usage	usage
IRT8Y5Q8	journalArticle	2023	Peng, Yuan; Henke, Elisa; Sedlmayr, Martin; Bathelt, Franziska	Towards ETL Processes to OMOP CDM Using Metadata and Modularization	Studies in Health Technology and Informatics		1879-8365	10.3233/SHTI230256	OMOP common data model (CDM) is designed for analyzing large clinical data and building cohorts for medical research, which requires Extract-Transform-Load processes (ETL) of local heterogeneous medical data. We present a concept for developing and evaluating a modularized metadata-driven ETL process, which can transform data into OMOP CDM regardless of 1) the source data format, 2) its versions …	2023-05-18	751-752		302	yes	yes	-	yes	-	-	-	-
J8X6R4MF	journalArticle	2022	Lavallee, M; Yu, T; Evans, L; Van Hemelrijck, M; Bosco, C; Golozar, A; Asiimwe, A	Evaluating the performance of temporal pattern discovery: new application using statins and rhabdomyolysis in OMOP databases	BMC MEDICAL INFORMATICS AND DECISION MAKING		1472-6947	10.1186/s12911-022-01765-1	Background Temporal pattern discovery (TPD) is a method of signal detection using electronic healthcare databases, serving as an alternative to spontaneous reporting of adverse drug events. Here, we aimed to replicate and optimise a TPD approach previously used to assess temporal signals of statins with rhabdomyolysis (in The Health Improvement Network (THIN) database) by using the OHDSI tools de…	2022-02-03		1	22	no	-	no	no	usage	-	usage	usage
JRM8GEYQ	conferencePaper	2020	Reinecke, I; Gulden, C; Kummel, M; Nassirian, A; Blasini, R; Sedlmayr, M	Design for a Modular Clinical Trial Recruitment Support System Based on FHIR and OMOP	Technische Universitat Dresden	0926-9630		10.3233/SHTI200142	The MIRACUM consortium is developing a Clinical Trials Recruitment Support System to support the data-driven recruitment of patients for clinical trials. The design of the prototype includes both open source solutions (OMOP CDM, Atlas) and open standards for interoperability (FHIR). The aim of the prototype is to create a patient screening list of potential participants for a clinical study. The …	2020	158-162		270	no	-	no	no	usage	-	usage	usage
JRS27LIV	journalArticle	2022	Rambla, J; Baudis, M; Ariosa, R; Beck, T; Fromont, LA; Navarro, A; Paloots, R; Rueda, M; Saunders, G; Singh, B; Spalding, JD; Tornroos, J; Vasallo, C; Veal, CD; Brookes, AJ	Beacon v2 and Beacon networks: A "lingua franca" for federated data discovery in biomedical genomics, and beyond	HUMAN MUTATION		1059-7794	10.1002/humu.24369	Beacon is a basic data discovery protocol issued by the Global Alliance for Genomics and Health (GA4GH). The main goal addressed by version 1 of the Beacon protocol was to test the feasibility of broadly sharing human genomic data, through providing simple "yes" or "no" responses to queries about the presence of a given variant in datasets hosted by Beacon providers. The popularity of this concep…	2022-06	791-799	6	43	no	-	no	no	usage	-	mentioned	mentioned
JSKHE8YJ	journalArticle	2021	Jeon, H; You, SC; Kang, SY; Seo, SI; Warner, JL; Belenkaya, R; Park, RW	Characterizing the Anticancer Treatment Trajectory and Pattern in Patients Receiving Chemotherapy for Cancer Using Harmonized Observational Databases: Retrospective Study	JMIR MEDICAL INFORMATICS		2291-9694	10.2196/25035	Background: Accurate and rapid clinical decisions based on real-world evidence are essential for patients with cancer. However, the complexity of chemotherapy regimens for cancer impedes retrospective research that uses observational health databases. Objective: The aim of this study is to compare the anticancer treatment trajectories and patterns of clinical events according to regimen type usin…	2021-04		4	9	no	-	no	no	usage	-	usage	usage
JUESS5U6	journalArticle	2021	Kim, KH; Choi, W; Ko, SJ; Chang, DJ; Chung, YW; Chang, SH; Kim, JK; Kim, DJ; Choi, IY	Multi-Center Healthcare Data Quality Measurement Model and Assessment Using OMOP CDM	APPLIED SCIENCES-BASEL		2076-3417	10.3390/app11199188	Healthcare data has economic value and is evaluated as such. Therefore, it attracted global attention from observational and clinical studies alike. Recently, the importance of data quality research emerged in healthcare data research. Various studies are being conducted on this topic. In this study, we propose a DQ4HEALTH model that can be applied to healthcare when reviewing existing data quali…	2021-10		19	11	no	-	no	no	usage	-	usage	usage
KDV29J8N	journalArticle	2022	Park, ChulHyoung; You, Seng Chan; Jeon, Hokyun; Jeong, Chang Won; Choi, Jin Wook; Park, Rae Woong	Development and Validation of the Radiology Common Data Model (R-CDM) for the International Standardization of Medical Imaging Data	Yonsei Medical Journal		1976-2437	10.3349/ymj.2022.63.S74	PURPOSE: Digital Imaging and Communications in Medicine (DICOM), a standard file format for medical imaging data, contains metadata describing each file. However, metadata are often incomplete, and there is no standardized format for recording metadata, leading to inefficiency during the metadata-based data retrieval process. Here, we propose a novel standardization method for DICOM metadata term…	2022-01	S74-S83	Suppl	63	yes	yes	-	yes	-	-	-	-
KL323PWP	conferencePaper	2020	Tong, JY; Duan, R; Li, RW; Scheuemie, MJ; Moore, JH; Chen, Y	Robust-ODAL: Learning from heterogeneous health systems without sharing patient-level data	University of Pennsylvania	978-981-121-563-6			Electronic Health Records (EHR) contain extensive patient data on various health outcomes and risk predictors, providing an efficient and wide-reaching source for health research. Integrated EHR data can provide a larger sample size of the population to improve estimation and prediction accuracy. To overcome the obstacle of sharing patient-level data, distributed algorithms were developed to cond…	2020	695-706			no	-	no	no	usage	-	evaluation	evaluation
KQVYF2Y3	journalArticle	2022	Delanerolle, G; Williams, R; Stipancic, A; Byford, R; Forbes, A; Tsang, RSM; Anand, SN; Bradley, D; Murphy, S; Akbari, A; Bedston, S; Lyons, RA; Owen, R; Torabi, F; Beggs, J; Chuter, A; Balharry, D; Joy, M; Sheikh, A; Hobbs, FDR; de Lusignan, S	Methodological Issues in Using a Common Data Model of COVID-19 Vaccine Uptake and Important Adverse Events of Interest: Feasibility Study of Data and Connectivity COVID-19 Vaccines Pharmacovigilance in the United Kingdom	JMIR FORMATIVE RESEARCH		2561-326X	10.2196/37821	Background: The Data and Connectivity COVID-19 Vaccines Pharmacovigilance (DaC-VaP) UK-wide collaboration was created to monitor vaccine uptake and effectiveness and provide pharmacovigilance using routine clinical and administrative data. To monitor these, pooled analyses may be needed. However, variation in terminologies present a barrier as England uses the Systematized Nomenclature of Medicin…	2022-08		8	6	yes	yes	-	yes	-	-	-	-
KTG6G3EF	journalArticle	2022	Papez, V; Moinat, M; Voss, EA; Bazakou, S; Van Winzum, A; Peviani, A; Payralbe, S; Kallfelz, M; Asselbergs, FW; Prieto-Alhambra, D; Dobson, RJB; Denaxas, S	Transforming and evaluating the UK Biobank to the OMOP Common Data Model for COVID-19 research and beyond	JOURNAL OF THE AMERICAN MEDICAL INFORMATICS ASSOCIATION		1067-5027	10.1093/jamia/ocac203	Objective The coronavirus disease 2019 (COVID-19) pandemic has demonstrated the value of real-world data for public health research. International federated analyses are crucial for informing policy makers. Common data models (CDMs) are critical for enabling these studies to be performed efficiently. Our objective was to convert the UK Biobank, a study of 500 000 participants with rich genetic an…	2022-12-13	103-111	1	30	yes	yes	-	yes	-	-	-	-
KXPP9AKM	journalArticle	2018	Hripcsak, G; Levine, ME; Shang, N; Ryan, PB	Effect of vocabulary mapping for conditions on phenotype cohorts	JOURNAL OF THE AMERICAN MEDICAL INFORMATICS ASSOCIATION		1067-5027	10.1093/jamia/ocy124	Objective: To study the effect on patient cohorts of mapping condition (diagnosis) codes from source billing vocabularies to a clinical vocabulary. Materials and Methods: Nine International Classification of Diseases, Ninth Revision, Clinical Modification (ICD9-CM) concept sets were extracted from eMERGE network phenotypes, translated to Systematized Nomenclature of Medicine - Clinical Terms conc…	2018-12	1618-1625	12	25	no	-	yes	yes	vocabulary	-	-	-
L2RDPWJE	journalArticle	2022	Swerdel, JN; Schuemie, M; Murray, G; Ryan, PB	PheValuator 2.0: Methodological improvements for the PheValuator approach to semi-automated phenotype algorithm evaluation	JOURNAL OF BIOMEDICAL INFORMATICS		1532-0464	10.1016/j.jbi.2022.104177	Purpose: Phenotype algorithms are central to performing analyses using observational data. These algorithms translate the clinical idea of a health condition into an executable set of rules allowing for queries of data ele-ments from a database. PheValuator, a software package in the Observational Health Data Sciences and Infor-matics (OHDSI) tool stack, provides a method to assess the performanc…	2022-11			135	no	-	no	no	usage	-	usage	usage
L5FL3V87	journalArticle	2021	Park, J; You, SC; Jeong, E; Weng, C; Park, D; Roh, J; Lee, DY; Cheong, JY; Choi, JW; Kang, M; Park, RW	A Framework (SOCRATex) for Hierarchical Annotation of Unstructured Electronic Health Records and Integration Into a Standardized Medical Database: Development and Usability Study	JMIR MEDICAL INFORMATICS		2291-9694	10.2196/23983	Background: Although electronic health records (EHRs) have been widely used in secondary assessments, clinical documents are relatively less utilized owing to the lack of standardized clinical text frameworks across different institutions. Objective: This study aimed to develop a framework for processing unstructured clinical documents of EHRs and integration with standardized structured data. Me…	2021-03		3	9	yes	yes	-	yes	-	-	-	-
LCYEBLP4	journalArticle	2021	Papez, V; Moinat, M; Payralbe, S; Asselbergs, FW; Lumbers, RT; Hemingway, H; Dobson, R; Denaxas, S	Transforming and evaluating electronic health record disease phenotyping algorithms using the OMOP common data model: a case study in heart failure	JAMIA OPEN		2574-2531	10.1093/jamiaopen/ooab001	Objective: The aim of the study was to transform a resource of linked electronic health records (EHR) to the OMOP common data model (CDM) and evaluate the process in terms of syntactic and semantic consistency and quality when implementing disease and risk factor phenotyping algorithms. Materials and Methods: Using heart failure (HF) as an exemplar, we represented three national EHR sources (Clin…	2021-07		3	4	yes	yes	-	yes	-	-	-	-
LDHLZLU6	journalArticle	2022	Tan, HX; Teo, DCH; Lee, D; Kim, C; Neo, JW; Sung, C; Chahed, H; Ang, PS; Tan, DSY; Park, RW; Dorajoo, SR	Applying the OMOP Common Data Model to Facilitate Benefit-Risk Assessments of Medicinal Products Using Real-World Data from Singapore and South Korea	HEALTHCARE INFORMATICS RESEARCH		2093-3681	10.4258/hir.2022.28.2.112	Objectives: The aim of this study was to characterize the benefits of converting Electronic Medical Records (EMRs) to a common data model (CDM) and to assess the potential of CDM-converted data to rapidly generate insights for benefitrisk assessments in post-market regulatory evaluation and decisions. Methods: EMRs from January 2013 to December 2016 were mapped onto the Observational Medical Outc…	2022-04	112-122	2	28	yes	yes	-	yes	-	-	-	-
LFS6XBIY	journalArticle	2022	Yoo, S; Yoon, E; Boo, D; Kim, B; Kim, S; Paeng, JC; Yoo, IR; Choi, IY; Kim, K; Ryoo, HG; Lee, SJ; Song, E; Joo, YH; Kim, J; Lee, HY	Transforming Thyroid Cancer Diagnosis and Staging Information from Unstructured Reports to the Observational Medical Outcome Partnership Common Data Model	APPLIED CLINICAL INFORMATICS		1869-0327	10.1055/s-0042-1748144	Background Cancer staging information is an essential component of cancer research. However, the information is primarily stored as either a full or semistructured free-text clinical document which is limiting the data use. By transforming the cancer-specific data to the Observational Medical Outcome Partnership Common Data Model (OMOP CDM), the information can contribute to establish multicenter…	2022-05	521-531	3	13	yes	yes	-	yes	-	-	-	-
LPVT83HE	journalArticle	2021	Almeida, JR; Silva, JF; Matos, S; Oliveira, JL	A two-stage workflow to extract and harmonize drug mentions from clinical notes into observational databases	JOURNAL OF BIOMEDICAL INFORMATICS		1532-0464	10.1016/j.jbi.2021.103849	Background: The content of the clinical notes that have been continuously collected along patients' health history has the potential to provide relevant information about treatments and diseases, and to increase the value of structured data available in Electronic Health Records (EHR) databases. EHR databases are currently being used in observational studies which lead to important findings in me…	2021-08			120	yes	yes	-	yes	-	-	-	-
MGR4BFIQ	journalArticle	2019	Shin, Seo Jeong; You, Seng Chan; Park, Yu Rang; Roh, Jin; Kim, Jang-Hee; Haam, Seokjin; Reich, Christian G.; Blacketer, Clair; Son, Dae-Soon; Oh, Seungbin; Park, Rae Woong	Genomic Common Data Model for Seamless Interoperation of Biomedical Data in Clinical Practice: Retrospective Study	Journal of Medical Internet Research		1438-8871	10.2196/13249	BACKGROUND: Clinical sequencing data should be shared in order to achieve the sufficient scale and diversity required to provide strong evidence for improving patient care. A distributed research network allows researchers to share this evidence rather than the patient-level data across centers, thereby avoiding privacy issues. The Observational Medical Outcomes Partnership (OMOP) common data mod…	2019-03-26	e13249	3	21	yes	yes	-	yes	-	-	-	-
MPV9U84Y	journalArticle	2020	Yu, Y; Ruddy, K; Mansfield, A; Zong, NS; Wen, A; Tsuji, S; Huang, M; Liu, HF; Shah, N; Jiang, GQ	Detecting and Filtering Immune-Related Adverse Events Signal Based on Text Mining and Observational Health Data Sciences and Informatics Common Data Model: Framework Development Study	JMIR MEDICAL INFORMATICS		2291-9694	10.2196/17353	Background: Immune checkpoint inhibitors are associated with unique immune-related adverse events (irAEs). As most of the immune checkpoint inhibitors are new to the market, it is important to conduct studies using real-world data sources to investigate their safety profiles. Objective: The aim of the study was to develop a framework for signal detection and filtration of novel irAEs for 6 Food a…	2020-06		6	8	no	-	no	no	usage	-	usage	usage
NJGT68XP	journalArticle	2023	Lee, Geun Hyeong; Park, Jonggul; Kim, Jihyeong; Kim, Yeesuk; Choi, Byungjin; Park, Rae Woong; Rhee, Sang Youl; Shin, Soo-Yong	Feasibility Study of Federated Learning on the Distributed Research Network of OMOP Common Data Model	Healthcare Informatics Research		2093-3681	10.4258/hir.2023.29.2.168	OBJECTIVES: Since protecting patients' privacy is a major concern in clinical research, there has been a growing need for privacy-preserving data analysis platforms. For this purpose, a federated learning (FL) method based on the Observational Medical Outcomes Partnership (OMOP) common data model (CDM) was implemented, and its feasibility was demonstrated. METHODS: We implemented an FL platform o…	2023-04	168-173	2	29	no	-	no	no	usage	-	usage	usage
P59W6CVT	journalArticle	2020	Lamer, Antoine; Depas, Nicolas; Doutreligne, Matthieu; Parrot, Adrien; Verloop, David; Defebvre, Marguerite-Marie; Ficheur, Grégoire; Chazard, Emmanuel; Beuscart, Jean-Baptiste	Transforming French Electronic Health Records into the Observational Medical Outcome Partnership's Common Data Model: A Feasibility Study	Applied Clinical Informatics		1869-0327	10.1055/s-0039-3402754	BACKGROUND: Common data models (CDMs) enable data to be standardized, and facilitate data exchange, sharing, and storage, particularly when the data have been collected via distinct, heterogeneous systems. Moreover, CDMs provide tools for data quality assessment, integration into models, visualization, and analysis. The observational medical outcome partnership (OMOP) provides a CDM for organizin…	2020-01	13-22	1	11	yes	yes	-	yes	-	-	-	-
PRDHXGQU	journalArticle	2020	Brat, GA; Weber, GM; Gehlenborg, N; Avillach, P; Palmer, NP; Chiovato, L; Cimino, J; Waitman, LR; Omenn, GS; Malovini, A; Moore, JH; Beaulieu-Jones, BK; Tibollo, V; Murphy, SN; L'Yi, S; Keller, MS; Bellazzi, R; Hanauer, DA; Serret-Larmande, A; Gutierrez-Sacristan, A; Holmes, JJ; Bell, DS; Mandl, KD; Follett, RW; Klann, JG; Murad, DA; Scudeller, L; Bucalo, M; Kirchoff, K; Craig, J; Obeid, J; Jouhe…	International electronic health record-derived COVID-19 clinical course profiles: the 4CE consortium	NPJ DIGITAL MEDICINE		2398-6352	10.1038/s41746-020-00308-0	We leveraged the largely untapped resource of electronic health record data to address critical clinical and epidemiological questions about Coronavirus Disease 2019 (COVID-19). To do this, we formed an international consortium (4CE) of 96 hospitals across five countries (). Contributors utilized the Informatics for Integrating Biology and the Bedside (i2b2) or Observational Medical Outcomes Part…	2020-08-19		1	3	no	-	no	no	usage	-	usage	usage
PTCVUABX	journalArticle	2018	Yang, Y; Zhou, XF; Gao, SQ; Lin, HB; Xie, YM; Feng, YJ; Huang, K; Zhan, SY	Evaluation of Electronic Healthcare Databases for Post-Marketing Drug Safety Surveillance and Pharmacoepidemiology in China	DRUG SAFETY		0114-5916	10.1007/s40264-017-0589-z	Introduction Electronic healthcare databases (EHDs) are used increasingly for post-marketing drug safety surveillance and pharmacoepidemiology in Europe and North America. However, few studies have examined the potential of these data sources in China. Methods Three major types of EHDs in China (i.e., a regional community-based database, a national claims database, and an electronic medical recor…	2018-01	125-137	1	41	no	-	no	no	evaluation	-	evaluation	evaluation
PVFQAZFC	journalArticle	2019	Haberson, Andrea; Rinner, Christoph; Schöberl, Alexander; Gall, Walter	Feasibility of Mapping Austrian Health Claims Data to the OMOP Common Data Model	Journal of Medical Systems		1573-689X	10.1007/s10916-019-1436-9	The Main Association of Austrian Social Security Institutions collects pseudonymized claims data from Austrian social security institutions and information about hospital stays in a database for research purposes. For new studies the same data are repeatedly reprocessed and it is difficult to compare different study results even though the data is already preprocessed and prepared in a proprietar…	2019-09-07	314	10	43	yes	yes	-	yes	-	-	-	-
PZG626YT	journalArticle	2020	Brandt, Pascal S.; Kiefer, Richard C.; Pacheco, Jennifer A.; Adekkanattu, Prakash; Sholle, Evan T.; Ahmad, Faraz S.; Xu, Jie; Xu, Zhenxing; Ancker, Jessica S.; Wang, Fei; Luo, Yuan; Jiang, Guoqian; Pathak, Jyotishman; Rasmussen, Luke V.	Toward cross-platform electronic health record-driven phenotyping using Clinical Quality Language	Learning Health Systems		2379-6146	10.1002/lrh2.10233	INTRODUCTION: Electronic health record (EHR)-driven phenotyping is a critical first step in generating biomedical knowledge from EHR data. Despite recent progress, current phenotyping approaches are manual, time-consuming, error-prone, and platform-specific. This results in duplication of effort and highly variable results across systems and institutions, and is not scalable or portable. In this …	2020-10	e10233	4	4	no	-	no	no	usage	-	usage	usage
Q6TXTHXJ	journalArticle	2023	Yoo, H; Yum, Y; Park, SW; Lee, JM; Jang, M; Kim, Y; Kim, JH; Park, HJ; Han, KS; Park, JH; Joo, HJ	Standardized Database of 12-Lead Electrocardiograms with a Common Standard for the Promotion of Cardiovascular Research: KURIAS-ECG	HEALTHCARE INFORMATICS RESEARCH		2093-3681	10.4258/hir.2023.29.2.132	Objectives: Electrocardiography (ECG)-based diagnosis by experts cannot maintain uniform quality because individual dif-ferences may occur. Previous public databases can be used for clinical studies, but there is no common standard that would allow databases to be combined. For this reason, it is difficult to conduct research that derives results by combining databases. Recent commercial ECG mach…	2023-04	132-144	2	29	yes	yes	-	yes	-	-	-	-
Q7TLID9Z	journalArticle	2023	Park, Jihwan; Lee, Ji Youl; Moon, Mi Hyoung; Park, Yong Hyun; Rho, Mi Jung	Cancer Research Line (CAREL): Development of Expanded Distributed Research Networks for Prostate Cancer and Lung Cancer	Technology in Cancer Research & Treatment		1533-0338	10.1177/15330338221149262	Objectives: Big data-based multicenter medical research is expected to bring significant advances to cancer treatment worldwide. However, there are concerns related to data sharing among multicenter networks. Clinical data can be shielded by firewalls using distributed research networks (DRNs). We attempted to develop DRNs for multicenter research that can be easily installed and used by any inst…	2023	1.53303e+16		22	no	-	no	no	usage	-	usage	usage
Q9FVQ4A6	journalArticle	2018	Prokosch, HU; Acker, T; Bernarding, J; Binder, H; Boeker, M; Boerries, M; Daumke, P; Ganslandt, T; Hesser, J; Honing, G; Neumaier, M; Marquardt, K; Renz, H; Rothkotter, HJ; Schade-Brittinger, C; Schmucker, P; Schuttler, J; Sedlmayr, M; Serve, H; Sohrabi, K; Storf, H	MIRACUM: Medical Informatics in Research and Care in University Medicine A Large Data Sharing Network to Enhance Translational Research and Medical Care	METHODS OF INFORMATION IN MEDICINE		0026-1270	10.3414/ME17-02-0025	Introduction: This article is part of the Focus Theme of Methods of Information in Medicine on the German Medical Informatics Initiative. Similar to other large international data sharing networks (e.g. OHDSI, PCORnet, eMerge, RD-Connect) MIRACUM is a consortium of academic and hospital partners as well as one industrial partner in eight German cities which have joined forces to create interopera…	2018-07	E82-E91		57	no	-	no	no	mentioned	-	mentioned	mentioned
QCCAA6MB	journalArticle	2019	Yuan, Chi; Ryan, Patrick B.; Ta, Casey; Guo, Yixuan; Li, Ziran; Hardin, Jill; Makadia, Rupa; Jin, Peng; Shang, Ning; Kang, Tian; Weng, Chunhua	Criteria2Query: a natural language interface to clinical databases for cohort definition	Journal of the American Medical Informatics Association: JAMIA		1527-974X	10.1093/jamia/ocy178	OBJECTIVE: Cohort definition is a bottleneck for conducting clinical research and depends on subjective decisions by domain experts. Data-driven cohort definition is appealing but requires substantial knowledge of terminologies and clinical data models. Criteria2Query is a natural language interface that facilitates human-computer collaboration for cohort definition and execution using clinical d…	2019-04-01	294-305	4	26	no	-	no	no	usage	-	usage	usage
QGERIXPB	journalArticle	2022	Kunnapuu, K; Ioannou, S; Ligi, K; Kolde, R; Laur, S; Vilo, J; Rijnbeek, PR; Reisberg, S	Trajectories: a framework for detecting temporal clinical event sequences from health data standardized to the Observational Medical Outcomes Partnership (OMOP) Common Data Model	JAMIA OPEN		2574-2531	10.1093/jamiaopen/ooac021	Objective To develop a framework for identifying temporal clinical event trajectories from Observational Medical Outcomes Partnership-formatted observational healthcare data. Materials and Methods A 4-step framework based on significant temporal event pair detection is described and implemented as an open-source R package. It is used on a population-based Estonian dataset to first replicate a lar…	2022-01-07		1	5	no	-	no	no	usage	-	usage	usage
QHGCVT2V	journalArticle	2021	Kim, JW; Kim, S; Ryu, B; Song, W; Lee, HY; Yoo, S	Transforming electronic health record polysomnographic data into the Observational Medical Outcome Partnership's Common Data Model: a pilot feasibility study	SCIENTIFIC REPORTS		2045-2322	10.1038/s41598-021-86564-w	Well-defined large-volume polysomnographic (PSG) data can identify subgroups and predict outcomes of obstructive sleep apnea (OSA). However, current PSG data are scattered across numerous sleep laboratories and have different formats in the electronic health record (EHR). Hence, this study aimed to convert EHR PSG into a standardized data format-the Observational Medical Outcome Partnership (OMOP…	2021-03-29		1	11	yes	yes	-	yes	-	-	-	-
QINVX9A4	journalArticle	2021	Khalid, S; Yang, C; Blacketer, C; Duarte-Salles, T; Fernandez-Bertolin, S; Kim, C; Park, RW; Park, J; Schuemie, MJ; Sena, AG; Suchard, MA; You, SC; Rijnbeek, PR; Reps, JM	A standardized analytics pipeline for reliable and rapid development and validation of prediction models using observational health data	COMPUTER METHODS AND PROGRAMS IN BIOMEDICINE		0169-2607	10.1016/j.cmpb.2021.106394	Background and objective: As a response to the ongoing COVID-19 pandemic, several prediction models in the existing literature were rapidly developed, with the aim of providing evidence-based guidance. How-ever, none of these COVID-19 prediction models have been found to be reliable. Models are commonly assessed to have a risk of bias, often due to insufficient reporting, use of non-representativ…	2021-11			211	no	-	no	no	usage	-	usage	usage
QL24C6JH	journalArticle	2019	Rogers, James R.; Callahan, Tiffany J.; Kang, Tian; Bauck, Alan; Khare, Ritu; Brown, Jeffrey S.; Kahn, Michael G.; Weng, Chunhua	A Data Element-Function Conceptual Model for Data Quality Checks	EGEMS (Washington, DC)		2327-9214	10.5334/egems.289	INTRODUCTION: In aggregate, existing data quality (DQ) checks are currently represented in heterogeneous formats, making it difficult to compare, categorize, and index checks. This study contributes a data element-function conceptual model to facilitate the categorization and indexing of DQ checks and explores the feasibility of leveraging natural language processing (NLP) for scalable acquisitio…	2019-04-23	17	1	7	no	-	no	no	usage	-	usage	usage
QW4T7RNE	journalArticle	2018	Hong, Na; Zhang, Ning; Wu, Huawei; Lu, Shanshan; Yu, Yue; Hou, Li; Lu, Yinying; Liu, Hongfang; Jiang, Guoqian	Preliminary exploration of survival analysis using the OHDSI common data model: a case study of intrahepatic cholangiocarcinoma	BMC medical informatics and decision making		1472-6947	10.1186/s12911-018-0686-7	BACKGROUND: Data heterogeneity is a common phenomenon related to the secondary use of electronic health records (EHR) data from different sources. The Observational Health Data Sciences and Informatics (OHDSI) Common Data Model (CDM) organizes healthcare data into standard data structures using concepts that are explicitly and formally specified through standard vocabularies, thereby facilitating…	2018-12-07	116	Suppl 5	18	yes	yes	-	yes	-	-	-	-
QYCUI8U7	journalArticle	2021	Lamer, A; Abou-Arab, O; Bourgeois, A; Parrot, A; Popoff, B; Beuscart, JB; Tavernier, B; Moussa, MD	Transforming Anesthesia Data Into the Observational Medical Outcomes Partnership Common Data Model: Development and Usability Study	JOURNAL OF MEDICAL INTERNET RESEARCH		1438-8871	10.2196/29259	Background: Electronic health records (EHRs, such as those created by an anesthesia management system) generate a large amount of data that can notably be reused for clinical audits and scientific research. The sharing of these data and tools is generally affected by the lack of system interoperability. To overcome these issues, Observational Health Data Sciences and Informatics (OHDSI) developed…	2021-10-29		10	23	yes	yes	-	yes	-	-	-	-
R3TYAXAW	journalArticle	2019	Glicksberg, BS; Oskotsky, B; Giangreco, N; Thangaraj, PM; Rudrapatna, V; Datta, D; Frazier, R; Lee, N; Larsen, R; Tatonetti, NP; Butte, AJ	ROMOP: a light-weight R package for interfacing with OMOP-formatted electronic health record data	JAMIA OPEN		2574-2531	10.1093/jamiaopen/ooy059	Objectives: Electronic health record (EHR) data are increasingly used for biomedical discoveries. The nature of the data, however, requires expertise in both data science and EHR structure. The Observational Medical Outcomes Partnership (OMOP) common data model (CDM) standardizes the language and structure of EHR data to promote interoperability of EHR data for research. While the OMOP CDM is val…	2019-04	41913	1	2	no	-	no	no	usage	-	extension	usage
R9FLL6PQ	journalArticle	2021	Maier, Christian; Kapsner, Lorenz A.; Mate, Sebastian; Prokosch, Hans-Ulrich; Kraus, Stefan	Patient Cohort Identification on Time Series Data Using the OMOP Common Data Model	Applied Clinical Informatics		1869-0327	10.1055/s-0040-1721481	BACKGROUND: The identification of patient cohorts for recruiting patients into clinical trials requires an evaluation of study-specific inclusion and exclusion criteria. These criteria are specified depending on corresponding clinical facts. Some of these facts may not be present in the clinical source systems and need to be calculated either in advance or at cohort query runtime (so-called feasi…	2021-01	57-64	1	12	no	-	no	no	usage	-	usage	usage
RQ7VSIS8	journalArticle	2023	Leese, P; Anand, A; Girvin, A; Manna, A; Patel, S; Yoo, YJ; Wong, R; Haendel, M; Chute, CG; Bennett, T; Hajagos, J; Pfaff, E; Moffitt, R	Clinical encounter heterogeneity and methods for resolving in networked EHR data: a study from N3C and RECOVER programs	JOURNAL OF THE AMERICAN MEDICAL INFORMATICS ASSOCIATION		1067-5027	10.1093/jamia/ocad057	Objective Clinical encounter data are heterogeneous and vary greatly from institution to institution. These problems of variance affect interpretability and usability of clinical encounter data for analysis. These problems are magnified when multisite electronic health record (EHR) data are networked together. This article presents a novel, generalizable method for resolving encounter heterogenei…	2023-05-19	1125-1136	6	30	no	-	no	no	mentioned	-	usage	usage
SAKC3M9L	journalArticle	2022	Jung, H; Yoo, S; Kim, S; Heo, E; Kim, B; Lee, HY; Hwang, H	Patient-Level Fall Risk Prediction Using the Observational Medical Outcomes Partnership's Common Data Model: Pilot Feasibility Study	JMIR MEDICAL INFORMATICS		2291-9694	10.2196/35104	Background: Falls in acute care settings threaten patients' safety. Researchers have been developing fall risk prediction models and exploring risk factors to provide evidence-based fall prevention practices; however, such efforts are hindered by insufficient samples, limited covariates, and a lack of standardized methodologies that aid study replication. Objective: The objectives of this study w…	2022-03		3	10	yes	yes	-	yes	-	-	-	-
SL82VRMH	journalArticle	2021	Schüttler, Christina; Prokosch, Hans-Ulrich; Sedlmayr, Martin; Sedlmayr, Brita	Evaluation of Three Feasibility Tools for Identifying Patient Data and Biospecimen Availability: Comparative Usability Study	JMIR medical informatics		2291-9694	10.2196/25531	BACKGROUND: To meet the growing importance of real-word data analysis, clinical data and biosamples must be timely made available. Feasibility platforms are often the first contact point for determining the availability of such data for specific research questions. Therefore, a user-friendly interface should be provided to enable access to this information easily. The German Medical Informatics I…	2021-07-21	e25531	7	9	no	-	no	no	evaluation	-	evaluation	evaluation
SV3KTH93	journalArticle	2019	Klann, JG; Joss, MAH; Embree, K; Murphy, SN	Data model harmonization for the All Of Us Research Program: Transforming i2b2 data into the OMOP common data model	PLOS ONE		1932-6203	10.1371/journal.pone.0212463	Background The All Of Us Research Program (AOU) is building a nationwide cohort of one million patients' EHR and genomic data. Data interoperability is paramount to the program's success. AOU is standardizing its EHR data around the Observational Medical Outcomes Partnership (OMOP) data model. OMOP is one of several standard data models presently used in national-scale initiatives. Each model is …	2019-02-19		2	14	yes	yes	-	yes	-	-	-	-
THSINC5F	journalArticle	2021	Hripcsak, George; Schuemie, Martijn J.; Madigan, David; Ryan, Patrick B.; Suchard, Marc A.	Drawing Reproducible Conclusions from Observational Clinical Data with OHDSI	Yearbook of Medical Informatics		2364-0502	10.1055/s-0041-1726481	OBJECTIVE: The current observational research literature shows extensive publication bias and contradiction. The Observational Health Data Sciences and Informatics (OHDSI) initiative seeks to improve research reproducibility through open science. METHODS: OHDSI has created an international federated data source of electronic health records and administrative claims that covers nearly 10% of the w…	2021-08	283-289	1	30	no	-	no	no	usage	-	usage	usage
TS29JT54	journalArticle	2023	Kohler, Severin; Boscá, Diego; Kärcher, Florian; Haarbrandt, Birger; Prinz, Manuel; Marschollek, Michael; Eils, Roland	Eos and OMOCL: Towards a seamless integration of openEHR records into the OMOP Common Data Model	Journal of Biomedical Informatics		1532-0480	10.1016/j.jbi.2023.104437	BACKGROUND: The reuse of data from electronic health records (EHRs) for research purposes promises to improve the data foundation for clinical trials and may even support to enable them. Nevertheless, EHRs are characterized by both, heterogeneous structure and semantics. To standardize this data for research, the Observational Medical Outcomes Partnership (OMOP) Common Data Model (CDM) standard h…	2023-07-12	104437		144	yes	yes	-	yes	-	-	-	-
TTGTYV73	journalArticle	2020	Tian, Y; Chen, WG; Zhou, TS; Li, J; Ding, KF; Li, JS	Establishment and evaluation of a multicenter collaborative prediction model construction framework supporting model generalization and continuous improvement: A pilot study	INTERNATIONAL JOURNAL OF MEDICAL INFORMATICS		1386-5056	10.1016/j.ijmedinf.2020.104173	Background and Objective: In recent years, an increasing number of clinical prediction models have been developed to serve clinical care. Establishing a data-driven prediction model based on large-scale electronic health record (EHR) data can provide a more empirical basis for clinical decision making. However, research on model generalization and continuous improvement is insufficiently focused,…	2020-09			141	no	-	no	no	usage	-	mentioned	mentioned
TWCRWJ2Y	journalArticle	2019	Guo, GN; Jonnagaddala, J; Farshid, S; Huser, V; Reich, C; Liaw, ST	Comparison of the cohort selection performance of Australian Medicines Terminology to Anatomical Therapeutic Chemical mappings	JOURNAL OF THE AMERICAN MEDICAL INFORMATICS ASSOCIATION		1067-5027	10.1093/jamia/ocz143	Objective: Electronic health records are increasingly utilized for observational and clinical research. Identification of cohorts using electronic health records is an important step in this process. Previous studies largely focused on the methods of cohort selection, but there is little evidence on the impact of underlying vocabularies and mappings between vocabularies used for cohort selection.…	2019-11	1237-1246	11	26	no	-	yes	no	vocabulary	-	vocabulary	vocabulary
TZH9TM5U	journalArticle	2021	Prats-Uribe, Albert; Sena, Anthony G.; Lai, Lana Yin Hui; Ahmed, Waheed-Ul-Rahman; Alghoul, Heba; Alser, Osaid; Alshammari, Thamir M.; Areia, Carlos; Carter, William; Casajust, Paula; Dawoud, Dalia; Golozar, Asieh; Jonnagaddala, Jitendra; Mehta, Paras P.; Gong, Mengchun; Morales, Daniel R.; Nyberg, Fredrik; Posada, Jose D.; Recalde, Martina; Roel, Elena; Shah, Karishma; Shah, Nigam H.; Schilling,…	Use of repurposed and adjuvant drugs in hospital patients with covid-19: multinational network cohort study	BMJ (Clinical research ed.)		1756-1833	10.1136/bmj.n1038	OBJECTIVE: To investigate the use of repurposed and adjuvant drugs in patients admitted to hospital with covid-19 across three continents. DESIGN: Multinational network cohort study. SETTING: Hospital electronic health records from the United States, Spain, and China, and nationwide claims data from South Korea. PARTICIPANTS: 303 264 patients admitted to hospital with covid-19 from January 2020 t…	2021-05-11	n1038		373	no	-	no	no	usage	-	usage	usage
UNUEUEAF	journalArticle	2018	Zhang, Xin; Wang, Li; Miao, Shumei; Xu, Hua; Yin, Yuechuchu; Zhu, Yueshi; Dai, Zuolei; Shan, Tao; Jing, Shenqi; Wang, Jian; Zhang, Xiaoliang; Huang, Zhongqiu; Wang, Zhongmin; Guo, Jianjun; Liu, Yun	Analysis of treatment pathways for three chronic diseases using OMOP CDM	Journal of Medical Systems		1573-689X	10.1007/s10916-018-1076-5	The present study examined treatment pathways (the ordered sequence of medications that a patient is prescribed) for three chronic diseases (hypertension, type 2 diabetes, and depression), compared the pathways with recommendations from guidelines, discussed differences and standardization of medications in different medical institutions, explored population diversification and changes of clinica…	2018-11-13	260	12	42	no	-	no	no	usage	-	usage	usage
UPA9B5JC	conferencePaper	2019	Viernes, B; Lynch, KE; South, B; Coronado, G; DuVall, SL	Characterizing VA Users with the OMOP Common Data Model	US Department of Veterans Affairs	0926-9630		10.3233/SHTI190561	In 2015, the VA Informatics and Computing Infrastructure, a resource center of the Department of Veterans Affairs, began to transform parts of its Corporate Data Warehouse (CDW) into the Observational Medical Outcomes Partnership) Common Data Model for use by its research and operations communities. Using the hierarchical relationships within the clinical vocabularies in OMOP we found differences…	2019	1614-1615		264	no	-	no	no	usage	-	usage	usage
V329EV2W	journalArticle	2023	Keloth, VK; Banda, JM; Gurley, M; Heider, PM; Kennedy, G; Liu, HF; Liu, FF; Miller, T; Natarajan, K; Patterson, OV; Peng, YF; Raja, K; Reeves, RM; Rouhizadeh, M; Shi, JL; Wang, XY; Wang, YS; Wei, WQ; Williams, AE; Zhang, R; Belenkaya, R; Reich, C; Blacketer, C; Ryan, P; Hripcsak, G; Elhada, N; Xu, H	Representing and utilizing clinical textual data for real world studies: An OHDSI approach	JOURNAL OF BIOMEDICAL INFORMATICS		1532-0464	10.1016/j.jbi.2023.104343	Clinical documentation in electronic health records contains crucial narratives and details about patients and their care. Natural language processing (NLP) can unlock the information conveyed in clinical notes and reports, and thus plays a critical role in real-world studies. The NLP Working Group at the Observational Health Data Sciences and Informatics (OHDSI) consortium was established to dev…	2023-06			142	yes	yes	-	yes	-	-	-	-
V9FK8EXT	journalArticle	2019	Hripcsak, G; Shang, N; Peissig, PL; Rasmussen, LV; Liu, C; Benoit, B; Carroll, RJ; Carrell, DS; Denny, JC; Dikilitas, O; Gainer, VS; Howell, KM; Klann, JG; Kullo, IJ; Lingren, T; Mentch, FD; Murphy, SN; Natarajan, K; Pacheco, JA; Wei, WQ; Wiley, K; Weng, CH	Facilitating phenotype transfer using a common data model	JOURNAL OF BIOMEDICAL INFORMATICS		1532-0464	10.1016/j.jbi.2019.103253	Background: Implementing clinical phenotypes across a network is labor intensive and potentially error prone. Use of a common data model may facilitate the process. Methods: Electronic Medical Records and Genomics (eMERGE) sites implemented the Observational Health Data Sciences and Informatics (OHDSI) Observational Medical Outcomes Partnership (OMOP) Common Data Model across their electronic hea…	2019-08			96	yes	yes	-	yes	-	-	-	-
VCQ92JMD	journalArticle	2023	Kempf, Emmanuelle; Vaterkowski, Morgan; Leprovost, Damien; Griffon, Nicolas; Ouagne, David; Breant, Stéphane; Serre, Patricia; Mouchet, Alexandre; Rance, Bastien; Chatellier, Gilles; Bellamine, Ali; Frank, Marie; Guerin, Julien; Tannier, Xavier; Livartowski, Alain; Hilka, Martin; Daniel, Christel	How to Improve Cancer Patients ENrollment in Clinical Trials From rEal-Life Databases Using the Observational Medical Outcomes Partnership Oncology Extension: Results of the PENELOPE Initiative in Urologic Cancers	JCO clinical cancer informatics		2473-4276	10.1200/CCI.22.00179	PURPOSE: To compare the computability of Observational Medical Outcomes Partnership (OMOP)-based queries related to prescreening of patients using two versions of the OMOP common data model (CDM; v5.3 and v5.4) and to assess the performance of the Greater Paris University Hospital (APHP) prescreening tool. MATERIALS AND METHODS: We identified the prescreening information items being relevant for …	2023-05	e2200179		7	no	-	no	no	usage	-	evaluation	evaluation
VSF4DTRV	conferencePaper	2020	Clementino, JM; Bones, CC; Faical, BS; Linares, OC; Lima, DM; Gutierrez, MA; Traina, C; Traina, AJM	Bag-of-Attributes Representation: a Vector Space Model for Electronic Health Records Analysis in OMOP	Universidade de Sao Paulo	2372-9198		10.1109/CBMS49503.2020.00045	Several studies have been performed worldwide to improve health services using data generated by digital medical systems. The increasing volume of data generated by these systems is making the use of knowledge discovery and data analysis techniques essential to improve the quality of the health services, which are offered by the medical facilities. However, it is possible to observe a gap, in the…	2020	197-202			no	-	no	no	usage	-	usage	usage
VXR482MZ	journalArticle	2023	Park, K; Cho, M; Song, M; Yoo, S; Baek, H; Kim, S; Kim, K	Exploring the potential of OMOP common data model for process mining in healthcare	PLOS ONE		1932-6203	10.1371/journal.pone.0279641	Background and objectiveRecently, Electronic Health Records (EHR) are increasingly being converted to Common Data Models (CDMs), a database schema designed to provide standardized vocabularies to facilitate collaborative observational research. To date, however, rare attempts exist to leverage CDM data for healthcare process mining, a technique to derive process-related knowledge (e.g., process m…	2023-01-03		1	18	no	-	no	no	usage	-	usage	usage
W2YVCPU7	journalArticle	2020	Kim, H; Yoo, S; Jeon, Y; Yi, S; Kim, S; Choi, SA; Hwang, H; Kim, KJ	Characterization of Anti-seizure Medication Treatment Pathways in Pediatric Epilepsy Using the Electronic Health Record-Based Common Data Model	FRONTIERS IN NEUROLOGY		1664-2295	10.3389/fneur.2020.00409	The purpose of this pilot study was to analyze treatment pathways of pediatric epilepsy using the common data model (CDM) based on electronic health record (EHR) data. We also aimed to reveal whether CDM analysis was feasible and applicable to epilepsy research. We analyzed the treatment pathways of pediatric epilepsy patients from our institute who underwent antiseizure medication (ASM) treatmen…	2020-05-12			11	no	-	no	no	usage	-	usage	usage
W32SYWIM	journalArticle	2021	Biedermann, Patricia; Ong, Rose; Davydov, Alexander; Orlova, Alexandra; Solovyev, Philip; Sun, Hong; Wetherill, Graham; Brand, Monika; Didden, Eva-Maria	Standardizing registry data to the OMOP Common Data Model: experience from three pulmonary hypertension databases	BMC medical research methodology		1471-2288	10.1186/s12874-021-01434-3	BACKGROUND: The Observational Medical Outcomes Partnership (OMOP) Common Data Model (CDM) can be used to transform observational health data to a common format. CDM transformation allows for analysis across disparate databases for the generation of new, real-word evidence, which is especially important in rare disease where data are limited. Pulmonary hypertension (PH) is a progressive, life-thre…	2021-11-02	238	1	21	no	-	no	no	wrong type of source data	-	wrong type of source data	wrong type of source data
WKG2T45V	journalArticle	2022	Hughes, N; Rijnbeek, PR; van Bochove, K; Duarte-Salles, T; Steinbeisser, C; Vizcaya, D; Prieto-Alhambra, D; Ryan, P	Evaluating a novel approach to stimulate open science collaborations: a case series of "study-a-thon" events within the OHDSI and European IMI communities	JAMIA OPEN		2574-2531	10.1093/jamiaopen/ooac100	Objective We introduce and review the concept of a study-a-thon as a catalyst for open science in medicine, utilizing harmonized real world, observation health data, tools, skills, and methods to conduct network studies, generating insights for those wishing to use study-a-thons for future research. Materials and Methods A series of historical study-a-thons since 2017 to present were reviewed for…	2022-10-04		4	5	no	-	no	no	evaluation	-	evaluation	evaluation
WVRNAH5Y	journalArticle	2019	Borghetti, Paolo; Bonù, Marco Lorenzo; Giubbolini, Rachele; Levra, Niccolo' Giaj; Mazzola, Rosario; Perna, Marco; Visani, Luca; Meacci, Fiammetta; Taraborrelli, Maria; Triggiani, Luca; Franceschini, Davide; Greco, Carlo; Bruni, Alessio; Magrini, Stefano Maria; Scotti, Vieri	Concomitant radiotherapy and TKI in metastatic EGFR- or ALK-mutated non-small cell lung cancer: a multicentric analysis on behalf of AIRO lung cancer study group	La Radiologia Medica		1826-6983	10.1007/s11547-019-00999-w	PURPOSE: To investigate the role of radiotherapy (RT) in the management of EGFR- or ALK-mutated metastatic non-small cell lung cancer (NSCLC) treated with TKI. MATERIALS AND METHODS: Clinical data of 106 patients (pts) from five Institutions treated with RT concomitant to TKI were retrospectively revised. Overall survival (OS) and toxicities were analyzed as endpoints of the study. RESULTS: Media…	2019-07	662-670	7	124	no	-	no	no	no OMOP or OHDSI	-	no OMOP or OHDSI	no OMOP or OHDSI
X76YCD5Z	journalArticle	2020	Ryu, Borim; Yoon, Eunsil; Kim, Seok; Lee, Sejoon; Baek, Hyunyoung; Yi, Soyoung; Na, Hee Young; Kim, Ji-Won; Baek, Rong-Min; Hwang, Hee; Yoo, Sooyoung	Transformation of Pathology Reports Into the Common Data Model With Oncology Module: Use Case for Colon Cancer	Journal of Medical Internet Research		1438-8871	10.2196/18526	BACKGROUND: Common data models (CDMs) help standardize electronic health record data and facilitate outcome analysis for observational and longitudinal research. An analysis of pathology reports is required to establish fundamental information infrastructure for data-driven colon cancer research. The Observational Medical Outcomes Partnership (OMOP) CDM is used in distributed research networks fo…	2020-12-09	e18526	12	22	yes	yes	-	yes	-	-	-	-
XKNK8A9R	journalArticle	2022	Amrollahi, Fatemeh; Shashikumar, Supreeth P.; Meier, Angela; Ohno-Machado, Lucila; Nemati, Shamim; Wardi, Gabriel	Inclusion of social determinants of health improves sepsis readmission prediction models	Journal of the American Medical Informatics Association: JAMIA		1527-974X	10.1093/jamia/ocac060	OBJECTIVE: Sepsis has a high rate of 30-day unplanned readmissions. Predictive modeling has been suggested as a tool to identify high-risk patients. However, existing sepsis readmission models have low predictive value and most predictive factors in such models are not actionable. MATERIALS AND METHODS: Data from patients enrolled in the AllofUs Research Program cohort from 35 hospitals were used…	2022-12-16	1263-1270	7	29	no	-	no	no	usage	-	usage	usage
XUKXEAV2	journalArticle	2022	Abeysinghe, R; Black, A; Kaduk, D; Li, YP; Reich, C; Davydov, A; Yao, LX; Cui, LC	Towards quality improvement of vaccine concept mappings in the OMOP vocabulary with a semi-automated method	JOURNAL OF BIOMEDICAL INFORMATICS		1532-0464	10.1016/j.jbi.2022.104162	The Observational Medical Outcomes Partnership (OMOP) Common Data Model (CDM) provides a unified model to integrate disparate real-world data (RWD) sources. An integral part of the OMOP CDM is the Standardized Vocabularies (henceforth referred to as the OMOP vocabulary), which enables organization and standardization of medical concepts across various clinical domains of the OMOP CDM. For concept…	2022-10			134	no	-	yes	no	vocabulary	-	vocabulary	vocabulary
YDMS24KU	journalArticle	2022	Pav, V; Burns, A; Colahan, C; Robison, B; Kean, J; DuVall, S	Illustration of Continuous Enrollment and Beneficiary Categorization in DoD and VA Infrastructure for Clinical Intelligence	MILITARY MEDICINE		0026-4075	10.1093/milmed/usac352	Introduction The DoD and VA Infrastructure for Clinical Intelligence (DaVINCI) data-sharing initiative has bridged the gap between DoD and VA data. DaVINCI utilizes the Observational Medical Outcomes Partnership (OMOP) Common Data Model (CDM) to map DoD and VA-specific health care codes to a standardized terminology. Although OMOP CDM provides a standardized longitudinal view of health care conce…	2022-12-03				no	-	no	no	usage	-	evaluation	usage
YJB9QKE7	journalArticle	2022	Liu, H; Carini, S; Chen, ZH; Hey, SP; Sim, I; Weng, CH	Ontology-based categorization of clinical studies by their conditions	JOURNAL OF BIOMEDICAL INFORMATICS		1532-0464	10.1016/j.jbi.2022.104235	Objective: The free-text Condition data field in the ClinicalTrials.gov is not amenable to computational processes for retrieving, aggregating and visualizing clinical studies by condition categories. This paper contributes a method for automated ontology-based categorization of clinical studies by their conditions.Materials and Methods: Our method first maps text entries in ClinicalTrials.gov's …	2022-11			135	yes	yes	-	yes	-	-	-	-
YMH5PL69	conferencePaper	2019	Lima, DM; Rodrigues, JF; Traina, AJM; Pires, FA; Gutierrez, MA	Transforming Two Decades of ePR Data to OMOP CDM for Clinical Research	Universidade de Sao Paulo	0926-9630		10.3233/SHTI190218	This paper presents the extract-transform-and-load (ETL) process from the Electronic Patient Records (ePR) at the Heart Institute (InCor) to the OMOP Common Data Model (CDM) format. We describe the initial database characterization, relational source mappings, selection filters, data transformations and patient de-identification using the open-source OHDSI tools and SQL scripts. We evaluate the r…	2019	233-237		264	yes	yes	-	yes	-	-	-	-
ZI9RBYMG	journalArticle	2021	Liu, H; Chi, Y; Butler, A; Sun, YC; Weng, CH	A knowledge base of clinical trial eligibility criteria	JOURNAL OF BIOMEDICAL INFORMATICS		1532-0464	10.1016/j.jbi.2021.103771	Objective: We present the Clinical Trial Knowledge Base, a regularly updated knowledge base of discrete clinical trial eligibility criteria equipped with a web-based user interface for querying and aggregate analysis of common eligibility criteria. Materials and methods: We used a natural language processing (NLP) tool named Criteria2Query (Yuan et al., 2019) to transform free text clinical trial…	2021-05			117	yes	yes	-	yes	-	-	-	-

## Sheet: Full-Text-Screening
Key	Item Type	Publication Year	Author	Title	Publication Title	ISBN	ISSN	DOI	Abstract Note	Date	Pages	Issue	Volume	Decision Reviewer 1 (EH)	Decision Reviewer 2 (FB)	Decision Reviewer 3 (MZ)	Decision final	Exclusion Criteria Reviewer 1 (EH)	Exclusion Criteria Reviewer 2 (FB)	Exclusion Criteria Reviewer 3 (MZ)	Exclusion Criteria final
2IACS54L	journalArticle	2023	Lamer, Antoine; Moussa, Mouhamed Djahoum; Marcilly, Romaric; Logier, Régis; Vallet, Benoit; Tavernier, Benoît	Development and usage of an anesthesia data warehouse: lessons learnt from a 10-year project	Journal of Clinical Monitoring and Computing		1573-2614	10.1007/s10877-022-00898-y	This paper describes the development and implementation of an anesthesia data warehouse in the Lille University Hospital. We share the lessons learned from a ten-year project and provide guidance for the implementation of such a project. Our clinical data warehouse is mainly fed with data collected by the anesthesia information management system and hospital discharge reports. The data warehouse …	2023-04	461-472	2	37	no	-	no	no	usage	-	usage	usage
42ADYWW3	journalArticle	2019	Haberson, Andrea; Rinner, Christoph; Gall, Walter	Standardizing Austrians Claims Data Using the OMOP Common Data Model: A Feasibility Study	Studies in Health Technology and Informatics		1879-8365		The suitability of the Observational Medical Outcomes Partnership (OMOP) common data model (CDM) for Austrian pseudonymized claims data from social security institutions and information about hospital stays is evaluated. 1,023 (99.7%) of ATC codes and 3,695 (98.6%) of ICD10 codes coincide with the OMOP vocabulary. Mappings for the local vocabularies like the Austrian pharmaceutical registration n…	2019	151-152		258	no	-	no	no	usage	-	evaluation	evaluation
5IL3ZD7B	journalArticle	2021	Sathappan, Selva Muthu Kumaran; Jeon, Young Seok; Dang, Trung Kien; Lim, Su Chi; Shao, Yi-Ming; Tai, E. Shyong; Feng, Mengling	Transformation of Electronic Health Records and Questionnaire Data to OMOP CDM: A Feasibility Study Using SG_T2DM Dataset	Applied Clinical Informatics		1869-0327	10.1055/s-0041-1732301	BACKGROUND: Diabetes mellitus (DM) is an important public health concern in Singapore and places a massive burden on health care spending. Tackling chronic diseases such as DM requires innovative strategies to integrate patients' data from diverse sources and use scientific discovery to inform clinical practice that can help better manage the disease. The Observational Medical Outcomes Partnershi…	2021-08	757-767	4	12	yes	yes	-	yes	-	-	-	-
7LQLXSSG	journalArticle	2020	Ji, H; Kim, S; Yi, S; Hwang, H; Kim, JW; Yoo, S	Converting clinical document architecture documents to the common data model for incorporating health information exchange data in observational health studies: CDA to CDM	JOURNAL OF BIOMEDICAL INFORMATICS		1532-0464	10.1016/j.jbi.2020.103459	Background: Utilization of standard health information exchange (HIE) data is growing due to the high adoption rate and interoperability of electronic health record (EHR) systems. However, integration of HIE data into an EHR system is not yet fully adopted in clinical research. In addition, data quality should be verified for the secondary use of these data. Thus, the aims of this study were to c…	2020-07			107	yes	yes	-	yes	-	-	-	-
7Z3HM7ZZ	journalArticle	2022	Bradwell, KR; Wooldridge, JT; Amor, B; Bennett, TD; Anand, A; Bremer, C; Yoo, YJ; Qian, ZL; Johnson, SG; Pfaff, ER; Girvin, AT; Manna, A; Niehaus, EA; Hong, SS; Zhang, XT; Zhu, RL; Bissell, M; Qureshi, N; Saltz, J; Haendel, MA; Chute, CG; Lehmann, HP; Moffitt, RA; N3C Consortium	Harmonizing units and values of quantitative data elements in a very large nationally pooled electronic health record (EHR) dataset	JOURNAL OF THE AMERICAN MEDICAL INFORMATICS ASSOCIATION		1067-5027	10.1093/jamia/ocac054	Objective The goals of this study were to harmonize data from electronic health records (EHRs) into common units, and impute units that were missing. Materials and Methods The National COVID Cohort Collaborative (N3C) table of laboratory measurement data-over 3.1 billion patient records and over 19 000 unique measurement concepts in the Observational Medical Outcomes Partnership (OMOP) common-dat…	2022-06-14	1172-1182	7	29	no	-	no	no	vocabulary	-	usage	vocabulary
895EVYA3	journalArticle	2021	Lenert, Leslie A.; Ilatovskiy, Andrey V.; Agnew, James; Rudisill, Patricia; Jacobs, Jeff; Weatherston, Duncan; Deans, Kenneth R.	Automated production of research data marts from a canonical fast healthcare interoperability resource data repository: applications to COVID-19 research	Journal of the American Medical Informatics Association: JAMIA		1527-974X	10.1093/jamia/ocab108	OBJECTIVE: The rapidly evolving COVID-19 pandemic has created a need for timely data from the healthcare systems for research. To meet this need, several large new data consortia have been developed that require frequent updating and sharing of electronic health record (EHR) data in different common data models (CDMs) to create multi-institutional databases for research. Traditionally, each CDM h…	2021-07-30	1605-1611	8	28	yes	yes	-	yes	-	-	-	-
9CU7WD9R	journalArticle	2022	Kim, Tae-Hoon; Noh, SiHyeong; Kim, Youe Ree; Lee, ChungSub; Kim, Ji Eon; Jeong, Chang-Won; Yoon, Kwon-Ha	Development and validation of a management system and dataset quality assessment tool for the Radiology Common Data Model (R_CDM): A case study in liver disease	International Journal of Medical Informatics		1872-8243	10.1016/j.ijmedinf.2022.104759	BACKGROUND: The Observational Medical Outcomes Partnership-Common Data Model (OMOP-CDM), a distributed research network, has low clinical data coverage. Radiological data are valuable, but imaging metadata are often incomplete, and a standardized recording format in the OMOP-CDM is lacking. We developed a web-based management system and data quality assessment (RQA) tool for a radiology_CDM (R_CD…	2022-04-01	104759		162	no	-	no	no	extension	-	extension	extension
9DTEY5T2	journalArticle	2021	Blacketer, C; Voss, EA; DeFalco, F; Hughes, N; Schuemie, MJ; Moinat, M; Rijnbeek, PR	Using the Data Quality Dashboard to Improve the EHDEN Network	APPLIED SCIENCES-BASEL		2076-3417	10.3390/app112411920	Federated networks of observational health databases have the potential to be a rich resource to inform clinical practice and regulatory decision making. However, the lack of standard data quality processes makes it difficult to know if these data are research ready. The EHDEN COVID-19 Rapid Collaboration Call presented the opportunity to assess how the newly developed open-source tool Data Quali…	2021-12		24	11	yes	yes	-	yes	-	-	-	-
9JLDRXYQ	journalArticle	2023	Yu, Y; Jiang, GQ; Brandt, E; Forsyth, T; Dhruva, SS; Zhang, SM; Chen, JJ; Noseworthy, PA; Doshi, AA; Collison-Farr, K; Kim, D; Ross, JS; Coplan, PM; Drozda, JP	Integrating real-world data to assess cardiac ablation device outcomes in a multicenter study using the OMOP common data model for regulatory decisions: implementation and evaluation	JAMIA OPEN		2574-2531	10.1093/jamiaopen/ooac108	The objective of this study is to describe application of the Observational Medical Outcomes Partnership (OMOP) common data model (CDM) to support medical device real-world evaluation in a National Evaluation System for health Technology Coordinating Center (NESTcc) Test-Case involving 2 healthcare systems, Mercy Health and Mayo Clinic. CDM implementation was coordinated across 2 healthcare syste…	2023-01-06		1	6	yes	yes	-	yes	-	-	-	-
A2R9BX6F	journalArticle	2020	Michael, Chelsea L.; Sholle, Evan T.; Wulff, Regina T.; Roboz, Gail J.; Campion, Thomas R.	Mapping Local Biospecimen Records to the OMOP Common Data Model	AMIA Joint Summits on Translational Science proceedings. AMIA Joint Summits on Translational Science		2153-4063		Research to support precision medicine for leukemia patients requires integration of biospecimen and clinical data. The Observational Medical Outcomes Partnership common data model (OMOP CDM) and its Specimen table presents a potential solution. Although researchers have described progress and challenges in mapping electronic health record (EHR) data to populate the OMOP CDM, to our knowledge no …	2020	422-429		2020	yes	yes	-	yes	-	-	-	-
ANGM39TT	journalArticle	2020	Yu, Yue; Ruddy, Kathryn J.; Wen, Andrew; Zong, Nansu; Tsuji, Shintaro; Chen, Jun; Shah, Nilay D.; Jiang, Guoqian	Integrating Electronic Health Record Data into the ADEpedia-on-OHDSI Platform for Improved Signal Detection: A Case Study of Immune-related Adverse Events	AMIA Joint Summits on Translational Science proceedings. AMIA Joint Summits on Translational Science		2153-4063		With widespread adoption of electronic health records (EHRs), Real World Data and Real World Evidence (RWE) have been increasingly used by FDA for evaluating drug safety and effectiveness. However, integration of heterogeneous drug safety data sources and systems remains an impediment for effective pharmacovigilance studies. In an ongoing project, we have developed a next generation pharmacovigil…	2020	710-719		2020	no	-	no	no	usage	-	usage	usage
CEGA9JJB	journalArticle	2018	Rinner, Christoph; Gezgin, Deniz; Wendl, Christopher; Gall, Walter	A Clinical Data Warehouse Based on OMOP and i2b2 for Austrian Health Claims Data	Studies in Health Technology and Informatics		1879-8365		BACKGROUND: To develop simulation models for healthcare related questions clinical data can be reused. OBJECTIVES: Develop a clinical data warehouse to harmonize different data sources in a standardized manner and get a reproducible interface for clinical data reuse. METHODS: The Kimball life cycle for the development of data warehouse was used. The development is split into the technical, the da…	2018	94-99		248	yes	yes	-	yes	-	-	-	-
D4K9WZ5L	journalArticle	2023	Kanbar, LJ; Dexheimer, JW; Zahner, J; Burrows, EK; Chatburn, R; Messinger, A; Baker, CD; Schuler, CL; Benscoter, D; Amin, R; Pajor, N	Standardizing electronic health record ventilation data in the pediatric long-term mechanical ventilator-dependent population	PEDIATRIC PULMONOLOGY		8755-6863	10.1002/ppul.26204	Background Sharing data across institutions is critical to improving care for children who are using long-term mechanical ventilation (LTMV). Mechanical ventilation data are complex and poorly standardized. This lack of data standardization is a major barrier to data sharing. Objective We aimed to describe current ventilator data in the electronic health record (EHR) and propose a framework for s…	2023-02	433-440	2	58	no	-	no	no	usage	-	usage	usage
D5YVSZL4	journalArticle	2019	Lynch, KE; Deppen, SA; DuVall, SL; Viernes, B; Cao, AZ; Park, D; Hanchrow, E; Hewa, K; Greaves, P; Matheny, ME	Incrementally Transforming Electronic Medical Records into the Observational Medical Outcomes Partnership Common Data Model: A Multidimensional Quality Assurance Approach	APPLIED CLINICAL INFORMATICS		1869-0327	10.1055/s-0039-1697598	Background The development and adoption of health care common data models (CDMs) has addressed some of the logistical challenges of performing research on data generated from disparate health care systems by standardizing data representations and leveraging standardized terminology to express clinical information consistently. However, transforming a data system into a CDM is not a trivial task, …	2019-10	794-803	5	10	no	-	no	no	usage	-	usage	usage
E3EJAMIK	journalArticle	2021	Gaudet-Blavignac, Christophe; Raisaro, Jean Louis; Touré, Vasundra; Österle, Sabine; Crameri, Katrin; Lovis, Christian	A National, Semantic-Driven, Three-Pillar Strategy to Enable Health Data Secondary Usage Interoperability for Research Within the Swiss Personalized Health Network: Methodological Study	JMIR medical informatics		2291-9694	10.2196/27591	BACKGROUND: Interoperability is a well-known challenge in medical informatics. Current trends in interoperability have moved from a data model technocentric approach to sustainable semantics, formal descriptive languages, and processes. Despite many initiatives and investments for decades, the interoperability challenge remains crucial. The need for data sharing for most purposes ranging from pat…	2021-06-24	e27591	6	9	no	-	no	no	mentioned	-	usage	mentioned
H4WFH4LE	journalArticle	2023	Frid, Santiago; Pastor Duran, Xavier; Bracons Cucó, Guillem; Pedrera-Jiménez, Miguel; Serrano-Balazote, Pablo; Muñoz Carrero, Adolfo; Lozano-Rubí, Raimundo	An Ontology-Based Approach for Consolidating Patient Data Standardized With European Norm/International Organization for Standardization 13606 (EN/ISO 13606) Into Joint Observational Medical Outcomes Partnership (OMOP) Repositories: Description of a Methodology	JMIR medical informatics		2291-9694	10.2196/44547	BACKGROUND: To discover new knowledge from data, they must be correct and in a consistent format. OntoCR, a clinical repository developed at Hospital Clínic de Barcelona, uses ontologies to represent clinical knowledge and map locally defined variables to health information standards and common data models. OBJECTIVE: The aim of the study is to design and implement a scalable methodology based on…	2023-03-08	e44547		11	yes	yes	-	yes	-	-	-
HPGCUZKE	journalArticle	2023	Oniani, David; Parmanto, Bambang; Saptono, Andi; Bove, Allyn; Freburger, Janet; Visweswaran, Shyam; Cappella, Nickie; McLay, Brian; Silverstein, Jonathan C.; Becich, Michael J.; Delitto, Anthony; Skidmore, Elizabeth; Wang, Yanshan	ReDWINE: A clinical datamart with text analytical capabilities to facilitate rehabilitation research	International Journal of Medical Informatics		1872-8243	10.1016/j.ijmedinf.2023.105144	Rehabilitation research focuses on determining the components of a treatment intervention, the mechanism of how these components lead to recovery and rehabilitation, and ultimately the optimal intervention strategies to maximize patients' physical, psychologic, and social functioning. Traditional randomized clinical trials that study and establish new interventions face challenges, such as high c…	2023-07-11	105144		177	yes	yes	-	yes	-	-	-	-
IRT8Y5Q8	journalArticle	2023	Peng, Yuan; Henke, Elisa; Sedlmayr, Martin; Bathelt, Franziska	Towards ETL Processes to OMOP CDM Using Metadata and Modularization	Studies in Health Technology and Informatics		1879-8365	10.3233/SHTI230256	OMOP common data model (CDM) is designed for analyzing large clinical data and building cohorts for medical research, which requires Extract-Transform-Load processes (ETL) of local heterogeneous medical data. We present a concept for developing and evaluating a modularized metadata-driven ETL process, which can transform data into OMOP CDM regardless of 1) the source data format, 2) its versions …	2023-05-18	751-752		302	no	-	no	no	usage	-	usage	usage
KDV29J8N	journalArticle	2022	Park, ChulHyoung; You, Seng Chan; Jeon, Hokyun; Jeong, Chang Won; Choi, Jin Wook; Park, Rae Woong	Development and Validation of the Radiology Common Data Model (R-CDM) for the International Standardization of Medical Imaging Data	Yonsei Medical Journal		1976-2437	10.3349/ymj.2022.63.S74	PURPOSE: Digital Imaging and Communications in Medicine (DICOM), a standard file format for medical imaging data, contains metadata describing each file. However, metadata are often incomplete, and there is no standardized format for recording metadata, leading to inefficiency during the metadata-based data retrieval process. Here, we propose a novel standardization method for DICOM metadata term…	2022-01	S74-S83	Suppl	63	no	-	no	no	extension	-	extension	extension
KQVYF2Y3	journalArticle	2022	Delanerolle, G; Williams, R; Stipancic, A; Byford, R; Forbes, A; Tsang, RSM; Anand, SN; Bradley, D; Murphy, S; Akbari, A; Bedston, S; Lyons, RA; Owen, R; Torabi, F; Beggs, J; Chuter, A; Balharry, D; Joy, M; Sheikh, A; Hobbs, FDR; de Lusignan, S	Methodological Issues in Using a Common Data Model of COVID-19 Vaccine Uptake and Important Adverse Events of Interest: Feasibility Study of Data and Connectivity COVID-19 Vaccines Pharmacovigilance in the United Kingdom	JMIR FORMATIVE RESEARCH		2561-326X	10.2196/37821	Background: The Data and Connectivity COVID-19 Vaccines Pharmacovigilance (DaC-VaP) UK-wide collaboration was created to monitor vaccine uptake and effectiveness and provide pharmacovigilance using routine clinical and administrative data. To monitor these, pooled analyses may be needed. However, variation in terminologies present a barrier as England uses the Systematized Nomenclature of Medicin…	2022-08		8	6	no	-	no	no	vocabulary	-	usage	usage
KTG6G3EF	journalArticle	2022	Papez, V; Moinat, M; Voss, EA; Bazakou, S; Van Winzum, A; Peviani, A; Payralbe, S; Kallfelz, M; Asselbergs, FW; Prieto-Alhambra, D; Dobson, RJB; Denaxas, S	Transforming and evaluating the UK Biobank to the OMOP Common Data Model for COVID-19 research and beyond	JOURNAL OF THE AMERICAN MEDICAL INFORMATICS ASSOCIATION		1067-5027	10.1093/jamia/ocac203	Objective The coronavirus disease 2019 (COVID-19) pandemic has demonstrated the value of real-world data for public health research. International federated analyses are crucial for informing policy makers. Common data models (CDMs) are critical for enabling these studies to be performed efficiently. Our objective was to convert the UK Biobank, a study of 500 000 participants with rich genetic an…	2022-12-13	103-111	1	30	yes	yes	-	yes	-	-	-	-
KXPP9AKM	journalArticle	2018	Hripcsak, G; Levine, ME; Shang, N; Ryan, PB	Effect of vocabulary mapping for conditions on phenotype cohorts	JOURNAL OF THE AMERICAN MEDICAL INFORMATICS ASSOCIATION		1067-5027	10.1093/jamia/ocy124	Objective: To study the effect on patient cohorts of mapping condition (diagnosis) codes from source billing vocabularies to a clinical vocabulary. Materials and Methods: Nine International Classification of Diseases, Ninth Revision, Clinical Modification (ICD9-CM) concept sets were extracted from eMERGE network phenotypes, translated to Systematized Nomenclature of Medicine - Clinical Terms conc…	2018-12	1618-1625	12	25	no	-	no	no	vocabulary	-	vocabulary	vocabulary
L5FL3V87	journalArticle	2021	Park, J; You, SC; Jeong, E; Weng, C; Park, D; Roh, J; Lee, DY; Cheong, JY; Choi, JW; Kang, M; Park, RW	A Framework (SOCRATex) for Hierarchical Annotation of Unstructured Electronic Health Records and Integration Into a Standardized Medical Database: Development and Usability Study	JMIR MEDICAL INFORMATICS		2291-9694	10.2196/23983	Background: Although electronic health records (EHRs) have been widely used in secondary assessments, clinical documents are relatively less utilized owing to the lack of standardized clinical text frameworks across different institutions. Objective: This study aimed to develop a framework for processing unstructured clinical documents of EHRs and integration with standardized structured data. Me…	2021-03		3	9	no	-	no	no	usage	-	usage	usage
LCYEBLP4	journalArticle	2021	Papez, V; Moinat, M; Payralbe, S; Asselbergs, FW; Lumbers, RT; Hemingway, H; Dobson, R; Denaxas, S	Transforming and evaluating electronic health record disease phenotyping algorithms using the OMOP common data model: a case study in heart failure	JAMIA OPEN		2574-2531	10.1093/jamiaopen/ooab001	Objective: The aim of the study was to transform a resource of linked electronic health records (EHR) to the OMOP common data model (CDM) and evaluate the process in terms of syntactic and semantic consistency and quality when implementing disease and risk factor phenotyping algorithms. Materials and Methods: Using heart failure (HF) as an exemplar, we represented three national EHR sources (Clin…	2021-07		3	4	yes	yes	-	yes	-	-	-	-
LDHLZLU6	journalArticle	2022	Tan, HX; Teo, DCH; Lee, D; Kim, C; Neo, JW; Sung, C; Chahed, H; Ang, PS; Tan, DSY; Park, RW; Dorajoo, SR	Applying the OMOP Common Data Model to Facilitate Benefit-Risk Assessments of Medicinal Products Using Real-World Data from Singapore and South Korea	HEALTHCARE INFORMATICS RESEARCH		2093-3681	10.4258/hir.2022.28.2.112	Objectives: The aim of this study was to characterize the benefits of converting Electronic Medical Records (EMRs) to a common data model (CDM) and to assess the potential of CDM-converted data to rapidly generate insights for benefitrisk assessments in post-market regulatory evaluation and decisions. Methods: EMRs from January 2013 to December 2016 were mapped onto the Observational Medical Outc…	2022-04	112-122	2	28	yes	yes	-	yes	-	-	-	-
LFS6XBIY	journalArticle	2022	Yoo, S; Yoon, E; Boo, D; Kim, B; Kim, S; Paeng, JC; Yoo, IR; Choi, IY; Kim, K; Ryoo, HG; Lee, SJ; Song, E; Joo, YH; Kim, J; Lee, HY	Transforming Thyroid Cancer Diagnosis and Staging Information from Unstructured Reports to the Observational Medical Outcome Partnership Common Data Model	APPLIED CLINICAL INFORMATICS		1869-0327	10.1055/s-0042-1748144	Background Cancer staging information is an essential component of cancer research. However, the information is primarily stored as either a full or semistructured free-text clinical document which is limiting the data use. By transforming the cancer-specific data to the Observational Medical Outcome Partnership Common Data Model (OMOP CDM), the information can contribute to establish multicenter…	2022-05	521-531	3	13	yes	no	-	no	-	usage	-	usage
LPVT83HE	journalArticle	2021	Almeida, JR; Silva, JF; Matos, S; Oliveira, JL	A two-stage workflow to extract and harmonize drug mentions from clinical notes into observational databases	JOURNAL OF BIOMEDICAL INFORMATICS		1532-0464	10.1016/j.jbi.2021.103849	Background: The content of the clinical notes that have been continuously collected along patients' health history has the potential to provide relevant information about treatments and diseases, and to increase the value of structured data available in Electronic Health Records (EHR) databases. EHR databases are currently being used in observational studies which lead to important findings in me…	2021-08			120	yes	yes	-	yes	-	-	-	-
MGR4BFIQ	journalArticle	2019	Shin, Seo Jeong; You, Seng Chan; Park, Yu Rang; Roh, Jin; Kim, Jang-Hee; Haam, Seokjin; Reich, Christian G.; Blacketer, Clair; Son, Dae-Soon; Oh, Seungbin; Park, Rae Woong	Genomic Common Data Model for Seamless Interoperation of Biomedical Data in Clinical Practice: Retrospective Study	Journal of Medical Internet Research		1438-8871	10.2196/13249	BACKGROUND: Clinical sequencing data should be shared in order to achieve the sufficient scale and diversity required to provide strong evidence for improving patient care. A distributed research network allows researchers to share this evidence rather than the patient-level data across centers, thereby avoiding privacy issues. The Observational Medical Outcomes Partnership (OMOP) common data mod…	2019-03-26	e13249	3	21	no	-	no	no	extension	-	extension	extension
P59W6CVT	journalArticle	2020	Lamer, Antoine; Depas, Nicolas; Doutreligne, Matthieu; Parrot, Adrien; Verloop, David; Defebvre, Marguerite-Marie; Ficheur, Grégoire; Chazard, Emmanuel; Beuscart, Jean-Baptiste	Transforming French Electronic Health Records into the Observational Medical Outcome Partnership's Common Data Model: A Feasibility Study	Applied Clinical Informatics		1869-0327	10.1055/s-0039-3402754	BACKGROUND: Common data models (CDMs) enable data to be standardized, and facilitate data exchange, sharing, and storage, particularly when the data have been collected via distinct, heterogeneous systems. Moreover, CDMs provide tools for data quality assessment, integration into models, visualization, and analysis. The observational medical outcome partnership (OMOP) provides a CDM for organizin…	2020-01	13-22	1	11	yes	yes	-	yes	-	-	-	-
PVFQAZFC	journalArticle	2019	Haberson, Andrea; Rinner, Christoph; Schöberl, Alexander; Gall, Walter	Feasibility of Mapping Austrian Health Claims Data to the OMOP Common Data Model	Journal of Medical Systems		1573-689X	10.1007/s10916-019-1436-9	The Main Association of Austrian Social Security Institutions collects pseudonymized claims data from Austrian social security institutions and information about hospital stays in a database for research purposes. For new studies the same data are repeatedly reprocessed and it is difficult to compare different study results even though the data is already preprocessed and prepared in a proprietar…	2019-09-07	314	10	43	yes	yes	-	yes	-	-	-	-
Q6TXTHXJ	journalArticle	2023	Yoo, H; Yum, Y; Park, SW; Lee, JM; Jang, M; Kim, Y; Kim, JH; Park, HJ; Han, KS; Park, JH; Joo, HJ	Standardized Database of 12-Lead Electrocardiograms with a Common Standard for the Promotion of Cardiovascular Research: KURIAS-ECG	HEALTHCARE INFORMATICS RESEARCH		2093-3681	10.4258/hir.2023.29.2.132	Objectives: Electrocardiography (ECG)-based diagnosis by experts cannot maintain uniform quality because individual dif-ferences may occur. Previous public databases can be used for clinical studies, but there is no common standard that would allow databases to be combined. For this reason, it is difficult to conduct research that derives results by combining databases. Recent commercial ECG mach…	2023-04	132-144	2	29	no	-	no	no	vocabulary	-	vocabulary	vocabulary
QHGCVT2V	journalArticle	2021	Kim, JW; Kim, S; Ryu, B; Song, W; Lee, HY; Yoo, S	Transforming electronic health record polysomnographic data into the Observational Medical Outcome Partnership's Common Data Model: a pilot feasibility study	SCIENTIFIC REPORTS		2045-2322	10.1038/s41598-021-86564-w	Well-defined large-volume polysomnographic (PSG) data can identify subgroups and predict outcomes of obstructive sleep apnea (OSA). However, current PSG data are scattered across numerous sleep laboratories and have different formats in the electronic health record (EHR). Hence, this study aimed to convert EHR PSG into a standardized data format-the Observational Medical Outcome Partnership (OMOP…	2021-03-29		1	11	yes	yes	-	yes	-	-	-	-
QW4T7RNE	journalArticle	2018	Hong, Na; Zhang, Ning; Wu, Huawei; Lu, Shanshan; Yu, Yue; Hou, Li; Lu, Yinying; Liu, Hongfang; Jiang, Guoqian	Preliminary exploration of survival analysis using the OHDSI common data model: a case study of intrahepatic cholangiocarcinoma	BMC medical informatics and decision making		1472-6947	10.1186/s12911-018-0686-7	BACKGROUND: Data heterogeneity is a common phenomenon related to the secondary use of electronic health records (EHR) data from different sources. The Observational Health Data Sciences and Informatics (OHDSI) Common Data Model (CDM) organizes healthcare data into standard data structures using concepts that are explicitly and formally specified through standard vocabularies, thereby facilitating…	2018-12-07	116	Suppl 5	18	yes	yes	-	yes	-	-	-	-
QYCUI8U7	journalArticle	2021	Lamer, A; Abou-Arab, O; Bourgeois, A; Parrot, A; Popoff, B; Beuscart, JB; Tavernier, B; Moussa, MD	Transforming Anesthesia Data Into the Observational Medical Outcomes Partnership Common Data Model: Development and Usability Study	JOURNAL OF MEDICAL INTERNET RESEARCH		1438-8871	10.2196/29259	Background: Electronic health records (EHRs, such as those created by an anesthesia management system) generate a large amount of data that can notably be reused for clinical audits and scientific research. The sharing of these data and tools is generally affected by the lack of system interoperability. To overcome these issues, Observational Health Data Sciences and Informatics (OHDSI) developed…	2021-10-29		10	23	yes	yes	-	yes	-	-	-	-
SAKC3M9L	journalArticle	2022	Jung, H; Yoo, S; Kim, S; Heo, E; Kim, B; Lee, HY; Hwang, H	Patient-Level Fall Risk Prediction Using the Observational Medical Outcomes Partnership's Common Data Model: Pilot Feasibility Study	JMIR MEDICAL INFORMATICS		2291-9694	10.2196/35104	Background: Falls in acute care settings threaten patients' safety. Researchers have been developing fall risk prediction models and exploring risk factors to provide evidence-based fall prevention practices; however, such efforts are hindered by insufficient samples, limited covariates, and a lack of standardized methodologies that aid study replication. Objective: The objectives of this study w…	2022-03		3	10	yes	yes	-	yes	-	-	-	-
SV3KTH93	journalArticle	2019	Klann, JG; Joss, MAH; Embree, K; Murphy, SN	Data model harmonization for the All Of Us Research Program: Transforming i2b2 data into the OMOP common data model	PLOS ONE		1932-6203	10.1371/journal.pone.0212463	Background The All Of Us Research Program (AOU) is building a nationwide cohort of one million patients' EHR and genomic data. Data interoperability is paramount to the program's success. AOU is standardizing its EHR data around the Observational Medical Outcomes Partnership (OMOP) data model. OMOP is one of several standard data models presently used in national-scale initiatives. Each model is …	2019-02-19		2	14	yes	yes	-	yes	-	-	-	-
TS29JT54	journalArticle	2023	Kohler, Severin; Boscá, Diego; Kärcher, Florian; Haarbrandt, Birger; Prinz, Manuel; Marschollek, Michael; Eils, Roland	Eos and OMOCL: Towards a seamless integration of openEHR records into the OMOP Common Data Model	Journal of Biomedical Informatics		1532-0480	10.1016/j.jbi.2023.104437	BACKGROUND: The reuse of data from electronic health records (EHRs) for research purposes promises to improve the data foundation for clinical trials and may even support to enable them. Nevertheless, EHRs are characterized by both, heterogeneous structure and semantics. To standardize this data for research, the Observational Medical Outcomes Partnership (OMOP) Common Data Model (CDM) standard h…	2023-07-12	104437		144	yes	yes	-	yes	-	-	-	-
V329EV2W	journalArticle	2023	Keloth, VK; Banda, JM; Gurley, M; Heider, PM; Kennedy, G; Liu, HF; Liu, FF; Miller, T; Natarajan, K; Patterson, OV; Peng, YF; Raja, K; Reeves, RM; Rouhizadeh, M; Shi, JL; Wang, XY; Wang, YS; Wei, WQ; Williams, AE; Zhang, R; Belenkaya, R; Reich, C; Blacketer, C; Ryan, P; Hripcsak, G; Elhada, N; Xu, H	Representing and utilizing clinical textual data for real world studies: An OHDSI approach	JOURNAL OF BIOMEDICAL INFORMATICS		1532-0464	10.1016/j.jbi.2023.104343	Clinical documentation in electronic health records contains crucial narratives and details about patients and their care. Natural language processing (NLP) can unlock the information conveyed in clinical notes and reports, and thus plays a critical role in real-world studies. The NLP Working Group at the Observational Health Data Sciences and Informatics (OHDSI) consortium was established to dev…	2023-06			142	no	-	no	no	no full text	-	no full text	no full text
V9FK8EXT	journalArticle	2019	Hripcsak, G; Shang, N; Peissig, PL; Rasmussen, LV; Liu, C; Benoit, B; Carroll, RJ; Carrell, DS; Denny, JC; Dikilitas, O; Gainer, VS; Howell, KM; Klann, JG; Kullo, IJ; Lingren, T; Mentch, FD; Murphy, SN; Natarajan, K; Pacheco, JA; Wei, WQ; Wiley, K; Weng, CH	Facilitating phenotype transfer using a common data model	JOURNAL OF BIOMEDICAL INFORMATICS		1532-0464	10.1016/j.jbi.2019.103253	Background: Implementing clinical phenotypes across a network is labor intensive and potentially error prone. Use of a common data model may facilitate the process. Methods: Electronic Medical Records and Genomics (eMERGE) sites implemented the Observational Health Data Sciences and Informatics (OHDSI) Observational Medical Outcomes Partnership (OMOP) Common Data Model across their electronic hea…	2019-08			96	yes	yes	-	yes	-	-	-	-
X76YCD5Z	journalArticle	2020	Ryu, Borim; Yoon, Eunsil; Kim, Seok; Lee, Sejoon; Baek, Hyunyoung; Yi, Soyoung; Na, Hee Young; Kim, Ji-Won; Baek, Rong-Min; Hwang, Hee; Yoo, Sooyoung	Transformation of Pathology Reports Into the Common Data Model With Oncology Module: Use Case for Colon Cancer	Journal of Medical Internet Research		1438-8871	10.2196/18526	BACKGROUND: Common data models (CDMs) help standardize electronic health record data and facilitate outcome analysis for observational and longitudinal research. An analysis of pathology reports is required to establish fundamental information infrastructure for data-driven colon cancer research. The Observational Medical Outcomes Partnership (OMOP) CDM is used in distributed research networks fo…	2020-12-09	e18526	12	22	yes	no	-	no	-	usage	-	usage
YJB9QKE7	journalArticle	2022	Liu, H; Carini, S; Chen, ZH; Hey, SP; Sim, I; Weng, CH	Ontology-based categorization of clinical studies by their conditions	JOURNAL OF BIOMEDICAL INFORMATICS		1532-0464	10.1016/j.jbi.2022.104235	Objective: The free-text Condition data field in the ClinicalTrials.gov is not amenable to computational processes for retrieving, aggregating and visualizing clinical studies by condition categories. This paper contributes a method for automated ontology-based categorization of clinical studies by their conditions.Materials and Methods: Our method first maps text entries in ClinicalTrials.gov's …	2022-11			135	no	-	no	no	no full text	-	no full text	no full text
YMH5PL69	conferencePaper	2019	Lima, DM; Rodrigues, JF; Traina, AJM; Pires, FA; Gutierrez, MA	Transforming Two Decades of ePR Data to OMOP CDM for Clinical Research	Universidade de Sao Paulo	0926-9630		10.3233/SHTI190218	This paper presents the extract-transform-and-load (ETL) process from the Electronic Patient Records (ePR) at the Heart Institute (InCor) to the OMOP Common Data Model (CDM) format. We describe the initial database characterization, relational source mappings, selection filters, data transformations and patient de-identification using the open-source OHDSI tools and SQL scripts. We evaluate the r…	2019	233-237		264	yes	yes	-	yes	-	-	-	-
ZI9RBYMG	journalArticle	2021	Liu, H; Chi, Y; Butler, A; Sun, YC; Weng, CH	A knowledge base of clinical trial eligibility criteria	JOURNAL OF BIOMEDICAL INFORMATICS		1532-0464	10.1016/j.jbi.2021.103771	Objective: We present the Clinical Trial Knowledge Base, a regularly updated knowledge base of discrete clinical trial eligibility criteria equipped with a web-based user interface for querying and aggregate analysis of common eligibility criteria. Materials and methods: We used a natural language processing (NLP) tool named Criteria2Query (Yuan et al., 2019) to transform free text clinical trial…	2021-05			117	no	-	no	no	vocabulary	-	vocabulary	vocabulary

## Sheet: Data extraction
Key	Item Type	Publication Year	Author	Title	Publication Title	ISBN	ISSN	DOI	Abstract Note	Date	Pages	Issue	Volume	Type of source data	Country	Dataset specification	Data profiling	Vocabulary identification	Coverage analysis of vocabularies	Semantic mapping	Structural mapping	ETL-process	Qualitative data quality analysis	Quantitative data quality analysis
QYCUI8U7	journalArticle	2021	Lamer, A; Abou-Arab, O; Bourgeois, A; Parrot, A; Popoff, B; Beuscart, JB; Tavernier, B; Moussa, MD	Transforming Anesthesia Data Into the Observational Medical Outcomes Partnership Common Data Model: Development and Usability Study	JOURNAL OF MEDICAL INTERNET RESEARCH		1438-8871	10.2196/29259	Background: Electronic health records (EHRs, such as those created by an anesthesia management system) generate a large amount of data that can notably be reused for clinical audits and scientific research. The sharing of these data and tools is generally affected by the lack of system interoperability. To overcome these issues, Observational Health Data Sciences and Informatics (OHDSI) developed…	2021-10-29		10	23	Clinical data	France	2		1		3	4	5
V9FK8EXT	journalArticle	2019	Hripcsak, G; Shang, N; Peissig, PL; Rasmussen, LV; Liu, C; Benoit, B; Carroll, RJ; Carrell, DS; Denny, JC; Dikilitas, O; Gainer, VS; Howell, KM; Klann, JG; Kullo, IJ; Lingren, T; Mentch, FD; Murphy, SN; Natarajan, K; Pacheco, JA; Wei, WQ; Wiley, K; Weng, CH	Facilitating phenotype transfer using a common data model	JOURNAL OF BIOMEDICAL INFORMATICS		1532-0464	10.1016/j.jbi.2019.103253	Background: Implementing clinical phenotypes across a network is labor intensive and potentially error prone. Use of a common data model may facilitate the process. Methods: Electronic Medical Records and Genomics (eMERGE) sites implemented the Observational Health Data Sciences and Informatics (OHDSI) Observational Medical Outcomes Partnership (OMOP) Common Data Model across their electronic hea…	2019-08			96	Clinical data, claims data	USA	1		2		3	4	5
SV3KTH93	journalArticle	2019	Klann, JG; Joss, MAH; Embree, K; Murphy, SN	Data model harmonization for the All Of Us Research Program: Transforming i2b2 data into the OMOP common data model	PLOS ONE		1932-6203	10.1371/journal.pone.0212463	Background The All Of Us Research Program (AOU) is building a nationwide cohort of one million patients' EHR and genomic data. Data interoperability is paramount to the program's success. AOU is standardizing its EHR data around the Observational Medical Outcomes Partnership (OMOP) data model. OMOP is one of several standard data models presently used in national-scale initiatives. Each model is …	2019-02-19		2	14	Clinical data	USA			1	2	3	4	5	6
9JLDRXYQ	journalArticle	2023	Yu, Y; Jiang, GQ; Brandt, E; Forsyth, T; Dhruva, SS; Zhang, SM; Chen, JJ; Noseworthy, PA; Doshi, AA; Collison-Farr, K; Kim, D; Ross, JS; Coplan, PM; Drozda, JP	Integrating real-world data to assess cardiac ablation device outcomes in a multicenter study using the OMOP common data model for regulatory decisions: implementation and evaluation	JAMIA OPEN		2574-2531	10.1093/jamiaopen/ooac108	The objective of this study is to describe application of the Observational Medical Outcomes Partnership (OMOP) common data model (CDM) to support medical device real-world evaluation in a National Evaluation System for health Technology Coordinating Center (NESTcc) Test-Case involving 2 healthcare systems, Mercy Health and Mayo Clinic. CDM implementation was coordinated across 2 healthcare syste…	2023-01-06		1	6	Clinical data	USA	1				3	2	4	5	6
LCYEBLP4	journalArticle	2021	Papez, V; Moinat, M; Payralbe, S; Asselbergs, FW; Lumbers, RT; Hemingway, H; Dobson, R; Denaxas, S	Transforming and evaluating electronic health record disease phenotyping algorithms using the OMOP common data model: a case study in heart failure	JAMIA OPEN		2574-2531	10.1093/jamiaopen/ooab001	Objective: The aim of the study was to transform a resource of linked electronic health records (EHR) to the OMOP common data model (CDM) and evaluate the process in terms of syntactic and semantic consistency and quality when implementing disease and risk factor phenotyping algorithms. Materials and Methods: Using heart failure (HF) as an exemplar, we represented three national EHR sources (Clin…	2021-07		3	4	Clinical data	UK	1	3	2		5	4	6	7	8
LDHLZLU6	journalArticle	2022	Tan, HX; Teo, DCH; Lee, D; Kim, C; Neo, JW; Sung, C; Chahed, H; Ang, PS; Tan, DSY; Park, RW; Dorajoo, SR	Applying the OMOP Common Data Model to Facilitate Benefit-Risk Assessments of Medicinal Products Using Real-World Data from Singapore and South Korea	HEALTHCARE INFORMATICS RESEARCH		2093-3681	10.4258/hir.2022.28.2.112	Objectives: The aim of this study was to characterize the benefits of converting Electronic Medical Records (EMRs) to a common data model (CDM) and to assess the potential of CDM-converted data to rapidly generate insights for benefitrisk assessments in post-market regulatory evaluation and decisions. Methods: EMRs from January 2013 to December 2016 were mapped onto the Observational Medical Outc…	2022-04	112-122	2	28	Clinical data	Singapore, South Korea		1	4		5	2	3		6
KTG6G3EF	journalArticle	2022	Papez, V; Moinat, M; Voss, EA; Bazakou, S; Van Winzum, A; Peviani, A; Payralbe, S; Kallfelz, M; Asselbergs, FW; Prieto-Alhambra, D; Dobson, RJB; Denaxas, S	Transforming and evaluating the UK Biobank to the OMOP Common Data Model for COVID-19 research and beyond	JOURNAL OF THE AMERICAN MEDICAL INFORMATICS ASSOCIATION		1067-5027	10.1093/jamia/ocac203	Objective The coronavirus disease 2019 (COVID-19) pandemic has demonstrated the value of real-world data for public health research. International federated analyses are crucial for informing policy makers. Common data models (CDMs) are critical for enabling these studies to be performed efficiently. Our objective was to convert the UK Biobank, a study of 500 000 participants with rich genetic an…	2022-12-13	103-111	1	30	Clinical data	UK	1	3	2	4	5	6	7	8	9
SAKC3M9L	journalArticle	2022	Jung, H; Yoo, S; Kim, S; Heo, E; Kim, B; Lee, HY; Hwang, H	Patient-Level Fall Risk Prediction Using the Observational Medical Outcomes Partnership's Common Data Model: Pilot Feasibility Study	JMIR MEDICAL INFORMATICS		2291-9694	10.2196/35104	Background: Falls in acute care settings threaten patients' safety. Researchers have been developing fall risk prediction models and exploring risk factors to provide evidence-based fall prevention practices; however, such efforts are hindered by insufficient samples, limited covariates, and a lack of standardized methodologies that aid study replication. Objective: The objectives of this study w…	2022-03		3	10	Clinical data	South Korea	1		2	3	4	5	6	7
LPVT83HE	journalArticle	2021	Almeida, JR; Silva, JF; Matos, S; Oliveira, JL	A two-stage workflow to extract and harmonize drug mentions from clinical notes into observational databases	JOURNAL OF BIOMEDICAL INFORMATICS		1532-0464	10.1016/j.jbi.2021.103849	Background: The content of the clinical notes that have been continuously collected along patients' health history has the potential to provide relevant information about treatments and diseases, and to increase the value of structured data available in Electronic Health Records (EHR) databases. EHR databases are currently being used in observational studies which lead to important findings in me…	2021-08			120	Clinical data	Portugal	1		2	3	4	5	6
YMH5PL69	conferencePaper	2019	Lima, DM; Rodrigues, JF; Traina, AJM; Pires, FA; Gutierrez, MA	Transforming Two Decades of ePR Data to OMOP CDM for Clinical Research	Universidade de Sao Paulo	0926-9630		10.3233/SHTI190218	This paper presents the extract-transform-and-load (ETL) process from the Electronic Patient Records (ePR) at the Heart Institute (InCor) to the OMOP Common Data Model (CDM) format. We describe the initial database characterization, relational source mappings, selection filters, data transformations and patient de-identification using the open-source OHDSI tools and SQL scripts. We evaluate the r…	2019	233-237		264	Clinical data	Brazil		1	3	4	5	2	6	7	8
7LQLXSSG	journalArticle	2020	Ji, H; Kim, S; Yi, S; Hwang, H; Kim, JW; Yoo, S	Converting clinical document architecture documents to the common data model for incorporating health information exchange data in observational health studies: CDA to CDM	JOURNAL OF BIOMEDICAL INFORMATICS		1532-0464	10.1016/j.jbi.2020.103459	Background: Utilization of standard health information exchange (HIE) data is growing due to the high adoption rate and interoperability of electronic health record (EHR) systems. However, integration of HIE data into an EHR system is not yet fully adopted in clinical research. In addition, data quality should be verified for the secondary use of these data. Thus, the aims of this study were to c…	2020-07			107	Clinical data	South Korea	1	2	3		4	5	6	7
QHGCVT2V	journalArticle	2021	Kim, JW; Kim, S; Ryu, B; Song, W; Lee, HY; Yoo, S	Transforming electronic health record polysomnographic data into the Observational Medical Outcome Partnership's Common Data Model: a pilot feasibility study	SCIENTIFIC REPORTS		2045-2322	10.1038/s41598-021-86564-w	Well-defined large-volume polysomnographic (PSG) data can identify subgroups and predict outcomes of obstructive sleep apnea (OSA). However, current PSG data are scattered across numerous sleep laboratories and have different formats in the electronic health record (EHR). Hence, this study aimed to convert EHR PSG into a standardized data format-the Observational Medical Outcome Partnership (OMOP…	2021-03-29		1	11	Clinical data	South Korea	1			2	3	4	5	6
9DTEY5T2	journalArticle	2021	Blacketer, C; Voss, EA; DeFalco, F; Hughes, N; Schuemie, MJ; Moinat, M; Rijnbeek, PR	Using the Data Quality Dashboard to Improve the EHDEN Network	APPLIED SCIENCES-BASEL		2076-3417	10.3390/app112411920	Federated networks of observational health databases have the potential to be a rich resource to inform clinical practice and regulatory decision making. However, the lack of standard data quality processes makes it difficult to know if these data are research ready. The EHDEN COVID-19 Rapid Collaboration Call presented the opportunity to assess how the newly developed open-source tool Data Quali…	2021-12		24	11	Clinical data	Spain, UK, Italy, Serbia, France, Belgium, Turkey, Portugal, the Netherlands, Estonia, Denmark		1	3		4	2	5	6
CEGA9JJB	journalArticle	2018	Rinner, Christoph; Gezgin, Deniz; Wendl, Christopher; Gall, Walter	A Clinical Data Warehouse Based on OMOP and i2b2 for Austrian Health Claims Data	Studies in Health Technology and Informatics		1879-8365		BACKGROUND: To develop simulation models for healthcare related questions clinical data can be reused. OBJECTIVES: Develop a clinical data warehouse to harmonize different data sources in a standardized manner and get a reproducible interface for clinical data reuse. METHODS: The Kimball life cycle for the development of data warehouse was used. The development is split into the technical, the da…	2018	94-99		248	Claims data	Austria			1	2	3	4	5	6
PVFQAZFC	journalArticle	2019	Haberson, Andrea; Rinner, Christoph; Schöberl, Alexander; Gall, Walter	Feasibility of Mapping Austrian Health Claims Data to the OMOP Common Data Model	Journal of Medical Systems		1573-689X	10.1007/s10916-019-1436-9	The Main Association of Austrian Social Security Institutions collects pseudonymized claims data from Austrian social security institutions and information about hospital stays in a database for research purposes. For new studies the same data are repeatedly reprocessed and it is difficult to compare different study results even though the data is already preprocessed and prepared in a proprietar…	2019-09-07	314	10	43	Claims data	Austria		4	1	2	3	5	6		7
5IL3ZD7B	journalArticle	2021	Sathappan, Selva Muthu Kumaran; Jeon, Young Seok; Dang, Trung Kien; Lim, Su Chi; Shao, Yi-Ming; Tai, E. Shyong; Feng, Mengling	Transformation of Electronic Health Records and Questionnaire Data to OMOP CDM: A Feasibility Study Using SG_T2DM Dataset	Applied Clinical Informatics		1869-0327	10.1055/s-0041-1732301	BACKGROUND: Diabetes mellitus (DM) is an important public health concern in Singapore and places a massive burden on health care spending. Tackling chronic diseases such as DM requires innovative strategies to integrate patients' data from diverse sources and use scientific discovery to inform clinical practice that can help better manage the disease. The Observational Medical Outcomes Partnershi…	2021-08	757-767	4	12	Clinical data	South Korea	1				2	3	4	6	5
A2R9BX6F	journalArticle	2020	Michael, Chelsea L.; Sholle, Evan T.; Wulff, Regina T.; Roboz, Gail J.; Campion, Thomas R.	Mapping Local Biospecimen Records to the OMOP Common Data Model	AMIA Joint Summits on Translational Science proceedings. AMIA Joint Summits on Translational Science		2153-4063		Research to support precision medicine for leukemia patients requires integration of biospecimen and clinical data. The Observational Medical Outcomes Partnership common data model (OMOP CDM) and its Specimen table presents a potential solution. Although researchers have described progress and challenges in mapping electronic health record (EHR) data to populate the OMOP CDM, to our knowledge no …	2020	422-429		2020	Clinical data	USA	2		1		3	4	5
QW4T7RNE	journalArticle	2018	Hong, Na; Zhang, Ning; Wu, Huawei; Lu, Shanshan; Yu, Yue; Hou, Li; Lu, Yinying; Liu, Hongfang; Jiang, Guoqian	Preliminary exploration of survival analysis using the OHDSI common data model: a case study of intrahepatic cholangiocarcinoma	BMC medical informatics and decision making		1472-6947	10.1186/s12911-018-0686-7	BACKGROUND: Data heterogeneity is a common phenomenon related to the secondary use of electronic health records (EHR) data from different sources. The Observational Health Data Sciences and Informatics (OHDSI) Common Data Model (CDM) organizes healthcare data into standard data structures using concepts that are explicitly and formally specified through standard vocabularies, thereby facilitating…	2018-12-07	116	Suppl 5	18	Clinical data	China	1				2	3	4		5
P59W6CVT	journalArticle	2020	Lamer, Antoine; Depas, Nicolas; Doutreligne, Matthieu; Parrot, Adrien; Verloop, David; Defebvre, Marguerite-Marie; Ficheur, Grégoire; Chazard, Emmanuel; Beuscart, Jean-Baptiste	Transforming French Electronic Health Records into the Observational Medical Outcome Partnership's Common Data Model: A Feasibility Study	Applied Clinical Informatics		1869-0327	10.1055/s-0039-3402754	BACKGROUND: Common data models (CDMs) enable data to be standardized, and facilitate data exchange, sharing, and storage, particularly when the data have been collected via distinct, heterogeneous systems. Moreover, CDMs provide tools for data quality assessment, integration into models, visualization, and analysis. The observational medical outcome partnership (OMOP) provides a CDM for organizin…	2020-01	13-22	1	11	Claims data	France	1	2	3		4	5	6	8	7
895EVYA3	journalArticle	2021	Lenert, Leslie A.; Ilatovskiy, Andrey V.; Agnew, James; Rudisill, Patricia; Jacobs, Jeff; Weatherston, Duncan; Deans, Kenneth R.	Automated production of research data marts from a canonical fast healthcare interoperability resource data repository: applications to COVID-19 research	Journal of the American Medical Informatics Association: JAMIA		1527-974X	10.1093/jamia/ocab108	OBJECTIVE: The rapidly evolving COVID-19 pandemic has created a need for timely data from the healthcare systems for research. To meet this need, several large new data consortia have been developed that require frequent updating and sharing of electronic health record (EHR) data in different common data models (CDMs) to create multi-institutional databases for research. Traditionally, each CDM h…	2021-07-30	1605-1611	8	28	Clinical data	USA					1	2	3	5	4
TS29JT54	journalArticle	2023	Kohler, Severin; Boscá, Diego; Kärcher, Florian; Haarbrandt, Birger; Prinz, Manuel; Marschollek, Michael; Eils, Roland	Eos and OMOCL: Towards a seamless integration of openEHR records into the OMOP Common Data Model	Journal of Biomedical Informatics		1532-0480	10.1016/j.jbi.2023.104437	BACKGROUND: The reuse of data from electronic health records (EHRs) for research purposes promises to improve the data foundation for clinical trials and may even support to enable them. Nevertheless, EHRs are characterized by both, heterogeneous structure and semantics. To standardize this data for research, the Observational Medical Outcomes Partnership (OMOP) Common Data Model (CDM) standard h…	2023-07-12	104437		144	Clinical data	Germany					1	2	3	4
HPGCUZKE	journalArticle	2023	Oniani, David; Parmanto, Bambang; Saptono, Andi; Bove, Allyn; Freburger, Janet; Visweswaran, Shyam; Cappella, Nickie; McLay, Brian; Silverstein, Jonathan C.; Becich, Michael J.; Delitto, Anthony; Skidmore, Elizabeth; Wang, Yanshan	ReDWINE: A clinical datamart with text analytical capabilities to facilitate rehabilitation research	International Journal of Medical Informatics		1872-8243	10.1016/j.ijmedinf.2023.105144	Rehabilitation research focuses on determining the components of a treatment intervention, the mechanism of how these components lead to recovery and rehabilitation, and ultimately the optimal intervention strategies to maximize patients' physical, psychologic, and social functioning. Traditional randomized clinical trials that study and establish new interventions face challenges, such as high c…	2023-07-11	105144		177	Clinical data, claims data	USA	1				2	3	4	5	6
H4WFH4LE	journalArticle	2023	Frid, Santiago; Pastor Duran, Xavier; Bracons Cucó, Guillem; Pedrera-Jiménez, Miguel; Serrano-Balazote, Pablo; Muñoz Carrero, Adolfo; Lozano-Rubí, Raimundo	An Ontology-Based Approach for Consolidating Patient Data Standardized With European Norm/International Organization for Standardization 13606 (EN/ISO 13606) Into Joint Observational Medical Outcomes Partnership (OMOP) Repositories: Description of a Methodology	JMIR medical informatics		2291-9694	10.2196/44547	BACKGROUND: To discover new knowledge from data, they must be correct and in a consistent format. OntoCR, a clinical repository developed at Hospital Clínic de Barcelona, uses ontologies to represent clinical knowledge and map locally defined variables to health information standards and common data models. OBJECTIVE: The aim of the study is to design and implement a scalable methodology based on…	2023-03-08	e44547		11	Clinical data	Spain	1	2	3		4	5	6
Sum																15	9	16	8	23	23	23	15	11

## Sheet: a) Clinical data
Key	Item Type	Publication Year	Author	Title	Publication Title	ISBN	ISSN	DOI	Abstract Note	Date	Pages	Issue	Volume	Type of source data	Country	Dataset specification	Data profiling	Vocabulary identification	Coverage analysis of vocabularies	Semantic mapping	Structural mapping	ETL-process	Qualitative data quality analysis	Quantitative data quality analysis
QYCUI8U7	journalArticle	2021	Lamer, A; Abou-Arab, O; Bourgeois, A; Parrot, A; Popoff, B; Beuscart, JB; Tavernier, B; Moussa, MD	Transforming Anesthesia Data Into the Observational Medical Outcomes Partnership Common Data Model: Development and Usability Study	JOURNAL OF MEDICAL INTERNET RESEARCH		1438-8871	10.2196/29259	Background: Electronic health records (EHRs, such as those created by an anesthesia management system) generate a large amount of data that can notably be reused for clinical audits and scientific research. The sharing of these data and tools is generally affected by the lack of system interoperability. To overcome these issues, Observational Health Data Sciences and Informatics (OHDSI) developed…	2021-10-29		10	23	Clinical data	France	2		1		3	4	5
V9FK8EXT	journalArticle	2019	Hripcsak, G; Shang, N; Peissig, PL; Rasmussen, LV; Liu, C; Benoit, B; Carroll, RJ; Carrell, DS; Denny, JC; Dikilitas, O; Gainer, VS; Howell, KM; Klann, JG; Kullo, IJ; Lingren, T; Mentch, FD; Murphy, SN; Natarajan, K; Pacheco, JA; Wei, WQ; Wiley, K; Weng, CH	Facilitating phenotype transfer using a common data model	JOURNAL OF BIOMEDICAL INFORMATICS		1532-0464	10.1016/j.jbi.2019.103253	Background: Implementing clinical phenotypes across a network is labor intensive and potentially error prone. Use of a common data model may facilitate the process. Methods: Electronic Medical Records and Genomics (eMERGE) sites implemented the Observational Health Data Sciences and Informatics (OHDSI) Observational Medical Outcomes Partnership (OMOP) Common Data Model across their electronic hea…	2019-08			96	Clinical data, claims data	USA	1		2		3	4	5
SV3KTH93	journalArticle	2019	Klann, JG; Joss, MAH; Embree, K; Murphy, SN	Data model harmonization for the All Of Us Research Program: Transforming i2b2 data into the OMOP common data model	PLOS ONE		1932-6203	10.1371/journal.pone.0212463	Background The All Of Us Research Program (AOU) is building a nationwide cohort of one million patients' EHR and genomic data. Data interoperability is paramount to the program's success. AOU is standardizing its EHR data around the Observational Medical Outcomes Partnership (OMOP) data model. OMOP is one of several standard data models presently used in national-scale initiatives. Each model is …	2019-02-19		2	14	Clinical data	USA			1	2	3	4	5	6
9JLDRXYQ	journalArticle	2023	Yu, Y; Jiang, GQ; Brandt, E; Forsyth, T; Dhruva, SS; Zhang, SM; Chen, JJ; Noseworthy, PA; Doshi, AA; Collison-Farr, K; Kim, D; Ross, JS; Coplan, PM; Drozda, JP	Integrating real-world data to assess cardiac ablation device outcomes in a multicenter study using the OMOP common data model for regulatory decisions: implementation and evaluation	JAMIA OPEN		2574-2531	10.1093/jamiaopen/ooac108	The objective of this study is to describe application of the Observational Medical Outcomes Partnership (OMOP) common data model (CDM) to support medical device real-world evaluation in a National Evaluation System for health Technology Coordinating Center (NESTcc) Test-Case involving 2 healthcare systems, Mercy Health and Mayo Clinic. CDM implementation was coordinated across 2 healthcare syste…	2023-01-06		1	6	Clinical data	USA	1				3	2	4	5	6
LCYEBLP4	journalArticle	2021	Papez, V; Moinat, M; Payralbe, S; Asselbergs, FW; Lumbers, RT; Hemingway, H; Dobson, R; Denaxas, S	Transforming and evaluating electronic health record disease phenotyping algorithms using the OMOP common data model: a case study in heart failure	JAMIA OPEN		2574-2531	10.1093/jamiaopen/ooab001	Objective: The aim of the study was to transform a resource of linked electronic health records (EHR) to the OMOP common data model (CDM) and evaluate the process in terms of syntactic and semantic consistency and quality when implementing disease and risk factor phenotyping algorithms. Materials and Methods: Using heart failure (HF) as an exemplar, we represented three national EHR sources (Clin…	2021-07		3	4	Clinical data	UK	1	3	2		5	4	6	7	8
LDHLZLU6	journalArticle	2022	Tan, HX; Teo, DCH; Lee, D; Kim, C; Neo, JW; Sung, C; Chahed, H; Ang, PS; Tan, DSY; Park, RW; Dorajoo, SR	Applying the OMOP Common Data Model to Facilitate Benefit-Risk Assessments of Medicinal Products Using Real-World Data from Singapore and South Korea	HEALTHCARE INFORMATICS RESEARCH		2093-3681	10.4258/hir.2022.28.2.112	Objectives: The aim of this study was to characterize the benefits of converting Electronic Medical Records (EMRs) to a common data model (CDM) and to assess the potential of CDM-converted data to rapidly generate insights for benefitrisk assessments in post-market regulatory evaluation and decisions. Methods: EMRs from January 2013 to December 2016 were mapped onto the Observational Medical Outc…	2022-04	112-122	2	28	Clinical data	Singapore, South Korea		1	4		5	2	3		6
KTG6G3EF	journalArticle	2022	Papez, V; Moinat, M; Voss, EA; Bazakou, S; Van Winzum, A; Peviani, A; Payralbe, S; Kallfelz, M; Asselbergs, FW; Prieto-Alhambra, D; Dobson, RJB; Denaxas, S	Transforming and evaluating the UK Biobank to the OMOP Common Data Model for COVID-19 research and beyond	JOURNAL OF THE AMERICAN MEDICAL INFORMATICS ASSOCIATION		1067-5027	10.1093/jamia/ocac203	Objective The coronavirus disease 2019 (COVID-19) pandemic has demonstrated the value of real-world data for public health research. International federated analyses are crucial for informing policy makers. Common data models (CDMs) are critical for enabling these studies to be performed efficiently. Our objective was to convert the UK Biobank, a study of 500 000 participants with rich genetic an…	2022-12-13	103-111	1	30	Clinical data	UK	1	3	2	4	5	6	7	8	9
SAKC3M9L	journalArticle	2022	Jung, H; Yoo, S; Kim, S; Heo, E; Kim, B; Lee, HY; Hwang, H	Patient-Level Fall Risk Prediction Using the Observational Medical Outcomes Partnership's Common Data Model: Pilot Feasibility Study	JMIR MEDICAL INFORMATICS		2291-9694	10.2196/35104	Background: Falls in acute care settings threaten patients' safety. Researchers have been developing fall risk prediction models and exploring risk factors to provide evidence-based fall prevention practices; however, such efforts are hindered by insufficient samples, limited covariates, and a lack of standardized methodologies that aid study replication. Objective: The objectives of this study w…	2022-03		3	10	Clinical data	South Korea	1		2	3	4	5	6	7
LPVT83HE	journalArticle	2021	Almeida, JR; Silva, JF; Matos, S; Oliveira, JL	A two-stage workflow to extract and harmonize drug mentions from clinical notes into observational databases	JOURNAL OF BIOMEDICAL INFORMATICS		1532-0464	10.1016/j.jbi.2021.103849	Background: The content of the clinical notes that have been continuously collected along patients' health history has the potential to provide relevant information about treatments and diseases, and to increase the value of structured data available in Electronic Health Records (EHR) databases. EHR databases are currently being used in observational studies which lead to important findings in me…	2021-08			120	Clinical data	Portugal	1		2	3	4	5	6
YMH5PL69	conferencePaper	2019	Lima, DM; Rodrigues, JF; Traina, AJM; Pires, FA; Gutierrez, MA	Transforming Two Decades of ePR Data to OMOP CDM for Clinical Research	Universidade de Sao Paulo	0926-9630		10.3233/SHTI190218	This paper presents the extract-transform-and-load (ETL) process from the Electronic Patient Records (ePR) at the Heart Institute (InCor) to the OMOP Common Data Model (CDM) format. We describe the initial database characterization, relational source mappings, selection filters, data transformations and patient de-identification using the open-source OHDSI tools and SQL scripts. We evaluate the r…	2019	233-237		264	Clinical data	Brazil		1	3	4	5	2	6	7	8
7LQLXSSG	journalArticle	2020	Ji, H; Kim, S; Yi, S; Hwang, H; Kim, JW; Yoo, S	Converting clinical document architecture documents to the common data model for incorporating health information exchange data in observational health studies: CDA to CDM	JOURNAL OF BIOMEDICAL INFORMATICS		1532-0464	10.1016/j.jbi.2020.103459	Background: Utilization of standard health information exchange (HIE) data is growing due to the high adoption rate and interoperability of electronic health record (EHR) systems. However, integration of HIE data into an EHR system is not yet fully adopted in clinical research. In addition, data quality should be verified for the secondary use of these data. Thus, the aims of this study were to c…	2020-07			107	Clinical data	South Korea	1	2	3		4	5	6	7
QHGCVT2V	journalArticle	2021	Kim, JW; Kim, S; Ryu, B; Song, W; Lee, HY; Yoo, S	Transforming electronic health record polysomnographic data into the Observational Medical Outcome Partnership's Common Data Model: a pilot feasibility study	SCIENTIFIC REPORTS		2045-2322	10.1038/s41598-021-86564-w	Well-defined large-volume polysomnographic (PSG) data can identify subgroups and predict outcomes of obstructive sleep apnea (OSA). However, current PSG data are scattered across numerous sleep laboratories and have different formats in the electronic health record (EHR). Hence, this study aimed to convert EHR PSG into a standardized data format-the Observational Medical Outcome Partnership (OMOP…	2021-03-29		1	11	Clinical data	South Korea	1			2	3	4	5	6
9DTEY5T2	journalArticle	2021	Blacketer, C; Voss, EA; DeFalco, F; Hughes, N; Schuemie, MJ; Moinat, M; Rijnbeek, PR	Using the Data Quality Dashboard to Improve the EHDEN Network	APPLIED SCIENCES-BASEL		2076-3417	10.3390/app112411920	Federated networks of observational health databases have the potential to be a rich resource to inform clinical practice and regulatory decision making. However, the lack of standard data quality processes makes it difficult to know if these data are research ready. The EHDEN COVID-19 Rapid Collaboration Call presented the opportunity to assess how the newly developed open-source tool Data Quali…	2021-12		24	11	Clinical data	Spain, UK, Italy, Serbia, France, Belgium, Turkey, Portugal, the Netherlands, Estonia, Denmark		1	3		4	2	5	6
5IL3ZD7B	journalArticle	2021	Sathappan, Selva Muthu Kumaran; Jeon, Young Seok; Dang, Trung Kien; Lim, Su Chi; Shao, Yi-Ming; Tai, E. Shyong; Feng, Mengling	Transformation of Electronic Health Records and Questionnaire Data to OMOP CDM: A Feasibility Study Using SG_T2DM Dataset	Applied Clinical Informatics		1869-0327	10.1055/s-0041-1732301	BACKGROUND: Diabetes mellitus (DM) is an important public health concern in Singapore and places a massive burden on health care spending. Tackling chronic diseases such as DM requires innovative strategies to integrate patients' data from diverse sources and use scientific discovery to inform clinical practice that can help better manage the disease. The Observational Medical Outcomes Partnershi…	2021-08	757-767	4	12	Clinical data	South Korea	1				2	3	4	6	5
A2R9BX6F	journalArticle	2020	Michael, Chelsea L.; Sholle, Evan T.; Wulff, Regina T.; Roboz, Gail J.; Campion, Thomas R.	Mapping Local Biospecimen Records to the OMOP Common Data Model	AMIA Joint Summits on Translational Science proceedings. AMIA Joint Summits on Translational Science		2153-4063		Research to support precision medicine for leukemia patients requires integration of biospecimen and clinical data. The Observational Medical Outcomes Partnership common data model (OMOP CDM) and its Specimen table presents a potential solution. Although researchers have described progress and challenges in mapping electronic health record (EHR) data to populate the OMOP CDM, to our knowledge no …	2020	422-429		2020	Clinical data	USA	2		1		3	4	5
QW4T7RNE	journalArticle	2018	Hong, Na; Zhang, Ning; Wu, Huawei; Lu, Shanshan; Yu, Yue; Hou, Li; Lu, Yinying; Liu, Hongfang; Jiang, Guoqian	Preliminary exploration of survival analysis using the OHDSI common data model: a case study of intrahepatic cholangiocarcinoma	BMC medical informatics and decision making		1472-6947	10.1186/s12911-018-0686-7	BACKGROUND: Data heterogeneity is a common phenomenon related to the secondary use of electronic health records (EHR) data from different sources. The Observational Health Data Sciences and Informatics (OHDSI) Common Data Model (CDM) organizes healthcare data into standard data structures using concepts that are explicitly and formally specified through standard vocabularies, thereby facilitating…	2018-12-07	116	Suppl 5	18	Clinical data	China	1				2	3	4		5
895EVYA3	journalArticle	2021	Lenert, Leslie A.; Ilatovskiy, Andrey V.; Agnew, James; Rudisill, Patricia; Jacobs, Jeff; Weatherston, Duncan; Deans, Kenneth R.	Automated production of research data marts from a canonical fast healthcare interoperability resource data repository: applications to COVID-19 research	Journal of the American Medical Informatics Association: JAMIA		1527-974X	10.1093/jamia/ocab108	OBJECTIVE: The rapidly evolving COVID-19 pandemic has created a need for timely data from the healthcare systems for research. To meet this need, several large new data consortia have been developed that require frequent updating and sharing of electronic health record (EHR) data in different common data models (CDMs) to create multi-institutional databases for research. Traditionally, each CDM h…	2021-07-30	1605-1611	8	28	Clinical data	USA					1	2	3	5	4
TS29JT54	journalArticle	2023	Kohler, Severin; Boscá, Diego; Kärcher, Florian; Haarbrandt, Birger; Prinz, Manuel; Marschollek, Michael; Eils, Roland	Eos and OMOCL: Towards a seamless integration of openEHR records into the OMOP Common Data Model	Journal of Biomedical Informatics		1532-0480	10.1016/j.jbi.2023.104437	BACKGROUND: The reuse of data from electronic health records (EHRs) for research purposes promises to improve the data foundation for clinical trials and may even support to enable them. Nevertheless, EHRs are characterized by both, heterogeneous structure and semantics. To standardize this data for research, the Observational Medical Outcomes Partnership (OMOP) Common Data Model (CDM) standard h…	2023-07-12	104437		144	Clinical data	Germany					1	2	3	4
HPGCUZKE	journalArticle	2023	Oniani, David; Parmanto, Bambang; Saptono, Andi; Bove, Allyn; Freburger, Janet; Visweswaran, Shyam; Cappella, Nickie; McLay, Brian; Silverstein, Jonathan C.; Becich, Michael J.; Delitto, Anthony; Skidmore, Elizabeth; Wang, Yanshan	ReDWINE: A clinical datamart with text analytical capabilities to facilitate rehabilitation research	International Journal of Medical Informatics		1872-8243	10.1016/j.ijmedinf.2023.105144	Rehabilitation research focuses on determining the components of a treatment intervention, the mechanism of how these components lead to recovery and rehabilitation, and ultimately the optimal intervention strategies to maximize patients' physical, psychologic, and social functioning. Traditional randomized clinical trials that study and establish new interventions face challenges, such as high c…	2023-07-11	105144		177	Clinical data, claims data	USA	1				2	3	4	5	6
H4WFH4LE	journalArticle	2023	Frid, Santiago; Pastor Duran, Xavier; Bracons Cucó, Guillem; Pedrera-Jiménez, Miguel; Serrano-Balazote, Pablo; Muñoz Carrero, Adolfo; Lozano-Rubí, Raimundo	An Ontology-Based Approach for Consolidating Patient Data Standardized With European Norm/International Organization for Standardization 13606 (EN/ISO 13606) Into Joint Observational Medical Outcomes Partnership (OMOP) Repositories: Description of a Methodology	JMIR medical informatics		2291-9694	10.2196/44547	BACKGROUND: To discover new knowledge from data, they must be correct and in a consistent format. OntoCR, a clinical repository developed at Hospital Clínic de Barcelona, uses ontologies to represent clinical knowledge and map locally defined variables to health information standards and common data models. OBJECTIVE: The aim of the study is to design and implement a scalable methodology based on…	2023-03-08	e44547		11	Clinical data	Spain	1	2	3		4	5	6
Sum																14	7	13	6	20	20	20	13	9
Process step / sequence	1	2	3	4	5	6	7	8	9	Sum	Most frequent numbering(s)	Chronological order
ETL- process	0	0	0.15	0.2	0.3	0.3	0.05	0	0	20	5.6	7
Semantic mapping	0.1	0.15	0.3	0.25	0.2	0	0	0	0	20	3	6
Structural mapping	0	0.3	0.15	0.3	0.2	0.05	0	0	0	20	2.4	5
Vocabulary identification	0.230769	0.384615	0.307692	0.0769231	0	0	0	0	0	13	2	3
Dataset specification	0.857143	0.142857	0	0	0	0	0	0	0	14	1	1
Qualitative data quality analysis	0	0	0	0.0769231	0.230769	0.307692	0.307692	0.0769231	0	13	6.7	9
Quantitative data quality analysis	0	0	0	0.111111	0.222222	0.333333	0	0.222222	0.111111	9	6	8
Data profiling	0.428571	0.285714	0.285714	0	0	0	0	0	0	7	1	2
Coverage analysis of vocabularies	0	0.333333	0.333333	0.333333	0	0	0	0	0	6	2,3,4	4

## Sheet: b) Claims data
Key	Item Type	Publication Year	Author	Title	Publication Title	ISBN	ISSN	DOI	Abstract Note	Date	Pages	Issue	Volume	Type of source data	Country	Dataset specification	Data profiling	Vocabulary identification	Coverage analysis of vocabularies	Semantic mapping	Structural mapping	ETL-process	Qualitative data quality analysis	Quantitative data quality analysis
V9FK8EXT	journalArticle	2019	Hripcsak, G; Shang, N; Peissig, PL; Rasmussen, LV; Liu, C; Benoit, B; Carroll, RJ; Carrell, DS; Denny, JC; Dikilitas, O; Gainer, VS; Howell, KM; Klann, JG; Kullo, IJ; Lingren, T; Mentch, FD; Murphy, SN; Natarajan, K; Pacheco, JA; Wei, WQ; Wiley, K; Weng, CH	Facilitating phenotype transfer using a common data model	JOURNAL OF BIOMEDICAL INFORMATICS		1532-0464	10.1016/j.jbi.2019.103253	Background: Implementing clinical phenotypes across a network is labor intensive and potentially error prone. Use of a common data model may facilitate the process. Methods: Electronic Medical Records and Genomics (eMERGE) sites implemented the Observational Health Data Sciences and Informatics (OHDSI) Observational Medical Outcomes Partnership (OMOP) Common Data Model across their electronic hea…	2019-08			96	Clinical data, claims data	USA	1		2		3	4	5
CEGA9JJB	journalArticle	2018	Rinner, Christoph; Gezgin, Deniz; Wendl, Christopher; Gall, Walter	A Clinical Data Warehouse Based on OMOP and i2b2 for Austrian Health Claims Data	Studies in Health Technology and Informatics		1879-8365		BACKGROUND: To develop simulation models for healthcare related questions clinical data can be reused. OBJECTIVES: Develop a clinical data warehouse to harmonize different data sources in a standardized manner and get a reproducible interface for clinical data reuse. METHODS: The Kimball life cycle for the development of data warehouse was used. The development is split into the technical, the da…	2018	94-99		248	Claims data	Austria			1	2	3	4	5	6
PVFQAZFC	journalArticle	2019	Haberson, Andrea; Rinner, Christoph; Schöberl, Alexander; Gall, Walter	Feasibility of Mapping Austrian Health Claims Data to the OMOP Common Data Model	Journal of Medical Systems		1573-689X	10.1007/s10916-019-1436-9	The Main Association of Austrian Social Security Institutions collects pseudonymized claims data from Austrian social security institutions and information about hospital stays in a database for research purposes. For new studies the same data are repeatedly reprocessed and it is difficult to compare different study results even though the data is already preprocessed and prepared in a proprietar…	2019-09-07	314	10	43	Claims data	Austria		4	1	2	3	5	6		7
P59W6CVT	journalArticle	2020	Lamer, Antoine; Depas, Nicolas; Doutreligne, Matthieu; Parrot, Adrien; Verloop, David; Defebvre, Marguerite-Marie; Ficheur, Grégoire; Chazard, Emmanuel; Beuscart, Jean-Baptiste	Transforming French Electronic Health Records into the Observational Medical Outcome Partnership's Common Data Model: A Feasibility Study	Applied Clinical Informatics		1869-0327	10.1055/s-0039-3402754	BACKGROUND: Common data models (CDMs) enable data to be standardized, and facilitate data exchange, sharing, and storage, particularly when the data have been collected via distinct, heterogeneous systems. Moreover, CDMs provide tools for data quality assessment, integration into models, visualization, and analysis. The observational medical outcome partnership (OMOP) provides a CDM for organizin…	2020-01	13-22	1	11	Claims data	France	1	2	3		4	5	6	8	7
HPGCUZKE	journalArticle	2023	Oniani, David; Parmanto, Bambang; Saptono, Andi; Bove, Allyn; Freburger, Janet; Visweswaran, Shyam; Cappella, Nickie; McLay, Brian; Silverstein, Jonathan C.; Becich, Michael J.; Delitto, Anthony; Skidmore, Elizabeth; Wang, Yanshan	ReDWINE: A clinical datamart with text analytical capabilities to facilitate rehabilitation research	International Journal of Medical Informatics		1872-8243	10.1016/j.ijmedinf.2023.105144	Rehabilitation research focuses on determining the components of a treatment intervention, the mechanism of how these components lead to recovery and rehabilitation, and ultimately the optimal intervention strategies to maximize patients' physical, psychologic, and social functioning. Traditional randomized clinical trials that study and establish new interventions face challenges, such as high c…	2023-07-11	105144		177	Clinical data, claims data	USA	1				2	3	4	5	6
Sum																3	2	4	2	5	5	5	3	3
Process step / sequence	1	2	3	4	5	6	7	8	9	Sum	Most frequent numbering(s)	Chronological order
ETL- process	0	0	0	0.2	0.4	0.4	0	0	0	5	5.6	7
Semantic mapping	0	0.2	0.6	0.2	0	0	0	0	0	5	3	5
Structural mapping	0	0	0.2	0.4	0.4	0	0	0	0	5	4.5	6
Vocabulary identification	0.5	0.25	0.25	0	0	0	0	0	0	4	1	2
Dataset specification	1	0	0	0	0	0	0	0	0	3	1	1
Qualitative data quality analysis	0	0	0	0	0.333333	0.333333	0	0.333333	0	3	5,6,8	8
Quantitative data quality analysis	0	0	0	0	0	0.333333	0.666667	0	0	3	7	9
Data profiling	0	0.5	0	0.5	0	0	0	0	0	2	2.4	4
Coverage analysis of vocabularies	0	1	0	0	0	0	0	0	0	2	2	3

## Sheet: c) Clinical and,or claims data
Key	Item Type	Publication Year	Author	Title	Publication Title	ISBN	ISSN	DOI	Abstract Note	Date	Pages	Issue	Volume	Type of source data	Country	Dataset specification	Data profiling	Vocabulary identification	Coverage analysis of vocabularies	Semantic mapping	Structural mapping	ETL-process	Qualitative data quality analysis	Quantitative data quality analysis
QYCUI8U7	journalArticle	2021	Lamer, A; Abou-Arab, O; Bourgeois, A; Parrot, A; Popoff, B; Beuscart, JB; Tavernier, B; Moussa, MD	Transforming Anesthesia Data Into the Observational Medical Outcomes Partnership Common Data Model: Development and Usability Study	JOURNAL OF MEDICAL INTERNET RESEARCH		1438-8871	10.2196/29259	Background: Electronic health records (EHRs, such as those created by an anesthesia management system) generate a large amount of data that can notably be reused for clinical audits and scientific research. The sharing of these data and tools is generally affected by the lack of system interoperability. To overcome these issues, Observational Health Data Sciences and Informatics (OHDSI) developed…	2021-10-29		10	23	Clinical data	France	2		1		3	4	5
V9FK8EXT	journalArticle	2019	Hripcsak, G; Shang, N; Peissig, PL; Rasmussen, LV; Liu, C; Benoit, B; Carroll, RJ; Carrell, DS; Denny, JC; Dikilitas, O; Gainer, VS; Howell, KM; Klann, JG; Kullo, IJ; Lingren, T; Mentch, FD; Murphy, SN; Natarajan, K; Pacheco, JA; Wei, WQ; Wiley, K; Weng, CH	Facilitating phenotype transfer using a common data model	JOURNAL OF BIOMEDICAL INFORMATICS		1532-0464	10.1016/j.jbi.2019.103253	Background: Implementing clinical phenotypes across a network is labor intensive and potentially error prone. Use of a common data model may facilitate the process. Methods: Electronic Medical Records and Genomics (eMERGE) sites implemented the Observational Health Data Sciences and Informatics (OHDSI) Observational Medical Outcomes Partnership (OMOP) Common Data Model across their electronic hea…	2019-08			96	Clinical data, claims data	USA	1		2		3	4	5
SV3KTH93	journalArticle	2019	Klann, JG; Joss, MAH; Embree, K; Murphy, SN	Data model harmonization for the All Of Us Research Program: Transforming i2b2 data into the OMOP common data model	PLOS ONE		1932-6203	10.1371/journal.pone.0212463	Background The All Of Us Research Program (AOU) is building a nationwide cohort of one million patients' EHR and genomic data. Data interoperability is paramount to the program's success. AOU is standardizing its EHR data around the Observational Medical Outcomes Partnership (OMOP) data model. OMOP is one of several standard data models presently used in national-scale initiatives. Each model is …	2019-02-19		2	14	Clinical data	USA			1	2	3	4	5	6
9JLDRXYQ	journalArticle	2023	Yu, Y; Jiang, GQ; Brandt, E; Forsyth, T; Dhruva, SS; Zhang, SM; Chen, JJ; Noseworthy, PA; Doshi, AA; Collison-Farr, K; Kim, D; Ross, JS; Coplan, PM; Drozda, JP	Integrating real-world data to assess cardiac ablation device outcomes in a multicenter study using the OMOP common data model for regulatory decisions: implementation and evaluation	JAMIA OPEN		2574-2531	10.1093/jamiaopen/ooac108	The objective of this study is to describe application of the Observational Medical Outcomes Partnership (OMOP) common data model (CDM) to support medical device real-world evaluation in a National Evaluation System for health Technology Coordinating Center (NESTcc) Test-Case involving 2 healthcare systems, Mercy Health and Mayo Clinic. CDM implementation was coordinated across 2 healthcare syste…	2023-01-06		1	6	Clinical data	USA	1				3	2	4	5	6
LCYEBLP4	journalArticle	2021	Papez, V; Moinat, M; Payralbe, S; Asselbergs, FW; Lumbers, RT; Hemingway, H; Dobson, R; Denaxas, S	Transforming and evaluating electronic health record disease phenotyping algorithms using the OMOP common data model: a case study in heart failure	JAMIA OPEN		2574-2531	10.1093/jamiaopen/ooab001	Objective: The aim of the study was to transform a resource of linked electronic health records (EHR) to the OMOP common data model (CDM) and evaluate the process in terms of syntactic and semantic consistency and quality when implementing disease and risk factor phenotyping algorithms. Materials and Methods: Using heart failure (HF) as an exemplar, we represented three national EHR sources (Clin…	2021-07		3	4	Clinical data	UK	1	3	2		5	4	6	7	8
LDHLZLU6	journalArticle	2022	Tan, HX; Teo, DCH; Lee, D; Kim, C; Neo, JW; Sung, C; Chahed, H; Ang, PS; Tan, DSY; Park, RW; Dorajoo, SR	Applying the OMOP Common Data Model to Facilitate Benefit-Risk Assessments of Medicinal Products Using Real-World Data from Singapore and South Korea	HEALTHCARE INFORMATICS RESEARCH		2093-3681	10.4258/hir.2022.28.2.112	Objectives: The aim of this study was to characterize the benefits of converting Electronic Medical Records (EMRs) to a common data model (CDM) and to assess the potential of CDM-converted data to rapidly generate insights for benefitrisk assessments in post-market regulatory evaluation and decisions. Methods: EMRs from January 2013 to December 2016 were mapped onto the Observational Medical Outc…	2022-04	112-122	2	28	Clinical data	Singapore, South Korea		1	4		5	2	3		6
KTG6G3EF	journalArticle	2022	Papez, V; Moinat, M; Voss, EA; Bazakou, S; Van Winzum, A; Peviani, A; Payralbe, S; Kallfelz, M; Asselbergs, FW; Prieto-Alhambra, D; Dobson, RJB; Denaxas, S	Transforming and evaluating the UK Biobank to the OMOP Common Data Model for COVID-19 research and beyond	JOURNAL OF THE AMERICAN MEDICAL INFORMATICS ASSOCIATION		1067-5027	10.1093/jamia/ocac203	Objective The coronavirus disease 2019 (COVID-19) pandemic has demonstrated the value of real-world data for public health research. International federated analyses are crucial for informing policy makers. Common data models (CDMs) are critical for enabling these studies to be performed efficiently. Our objective was to convert the UK Biobank, a study of 500 000 participants with rich genetic an…	2022-12-13	103-111	1	30	Clinical data	UK	1	3	2	4	5	6	7	8	9
SAKC3M9L	journalArticle	2022	Jung, H; Yoo, S; Kim, S; Heo, E; Kim, B; Lee, HY; Hwang, H	Patient-Level Fall Risk Prediction Using the Observational Medical Outcomes Partnership's Common Data Model: Pilot Feasibility Study	JMIR MEDICAL INFORMATICS		2291-9694	10.2196/35104	Background: Falls in acute care settings threaten patients' safety. Researchers have been developing fall risk prediction models and exploring risk factors to provide evidence-based fall prevention practices; however, such efforts are hindered by insufficient samples, limited covariates, and a lack of standardized methodologies that aid study replication. Objective: The objectives of this study w…	2022-03		3	10	Clinical data	South Korea	1		2	3	4	5	6	7
LPVT83HE	journalArticle	2021	Almeida, JR; Silva, JF; Matos, S; Oliveira, JL	A two-stage workflow to extract and harmonize drug mentions from clinical notes into observational databases	JOURNAL OF BIOMEDICAL INFORMATICS		1532-0464	10.1016/j.jbi.2021.103849	Background: The content of the clinical notes that have been continuously collected along patients' health history has the potential to provide relevant information about treatments and diseases, and to increase the value of structured data available in Electronic Health Records (EHR) databases. EHR databases are currently being used in observational studies which lead to important findings in me…	2021-08			120	Clinical data	Portugal	1		2	3	4	5	6
YMH5PL69	conferencePaper	2019	Lima, DM; Rodrigues, JF; Traina, AJM; Pires, FA; Gutierrez, MA	Transforming Two Decades of ePR Data to OMOP CDM for Clinical Research	Universidade de Sao Paulo	0926-9630		10.3233/SHTI190218	This paper presents the extract-transform-and-load (ETL) process from the Electronic Patient Records (ePR) at the Heart Institute (InCor) to the OMOP Common Data Model (CDM) format. We describe the initial database characterization, relational source mappings, selection filters, data transformations and patient de-identification using the open-source OHDSI tools and SQL scripts. We evaluate the r…	2019	233-237		264	Clinical data	Brazil		1	3	4	5	2	6	7	8
7LQLXSSG	journalArticle	2020	Ji, H; Kim, S; Yi, S; Hwang, H; Kim, JW; Yoo, S	Converting clinical document architecture documents to the common data model for incorporating health information exchange data in observational health studies: CDA to CDM	JOURNAL OF BIOMEDICAL INFORMATICS		1532-0464	10.1016/j.jbi.2020.103459	Background: Utilization of standard health information exchange (HIE) data is growing due to the high adoption rate and interoperability of electronic health record (EHR) systems. However, integration of HIE data into an EHR system is not yet fully adopted in clinical research. In addition, data quality should be verified for the secondary use of these data. Thus, the aims of this study were to c…	2020-07			107	Clinical data	South Korea	1	2	3		4	5	6	7
QHGCVT2V	journalArticle	2021	Kim, JW; Kim, S; Ryu, B; Song, W; Lee, HY; Yoo, S	Transforming electronic health record polysomnographic data into the Observational Medical Outcome Partnership's Common Data Model: a pilot feasibility study	SCIENTIFIC REPORTS		2045-2322	10.1038/s41598-021-86564-w	Well-defined large-volume polysomnographic (PSG) data can identify subgroups and predict outcomes of obstructive sleep apnea (OSA). However, current PSG data are scattered across numerous sleep laboratories and have different formats in the electronic health record (EHR). Hence, this study aimed to convert EHR PSG into a standardized data format-the Observational Medical Outcome Partnership (OMOP…	2021-03-29		1	11	Clinical data	South Korea	1			2	3	4	5	6
9DTEY5T2	journalArticle	2021	Blacketer, C; Voss, EA; DeFalco, F; Hughes, N; Schuemie, MJ; Moinat, M; Rijnbeek, PR	Using the Data Quality Dashboard to Improve the EHDEN Network	APPLIED SCIENCES-BASEL		2076-3417	10.3390/app112411920	Federated networks of observational health databases have the potential to be a rich resource to inform clinical practice and regulatory decision making. However, the lack of standard data quality processes makes it difficult to know if these data are research ready. The EHDEN COVID-19 Rapid Collaboration Call presented the opportunity to assess how the newly developed open-source tool Data Quali…	2021-12		24	11	Clinical data	Spain, UK, Italy, Serbia, France, Belgium, Turkey, Portugal, the Netherlands, Estonia, Denmark		1	3		4	2	5	6
CEGA9JJB	journalArticle	2018	Rinner, Christoph; Gezgin, Deniz; Wendl, Christopher; Gall, Walter	A Clinical Data Warehouse Based on OMOP and i2b2 for Austrian Health Claims Data	Studies in Health Technology and Informatics		1879-8365		BACKGROUND: To develop simulation models for healthcare related questions clinical data can be reused. OBJECTIVES: Develop a clinical data warehouse to harmonize different data sources in a standardized manner and get a reproducible interface for clinical data reuse. METHODS: The Kimball life cycle for the development of data warehouse was used. The development is split into the technical, the da…	2018	94-99		248	Claims data	Austria			1	2	3	4	5	6
PVFQAZFC	journalArticle	2019	Haberson, Andrea; Rinner, Christoph; Schöberl, Alexander; Gall, Walter	Feasibility of Mapping Austrian Health Claims Data to the OMOP Common Data Model	Journal of Medical Systems		1573-689X	10.1007/s10916-019-1436-9	The Main Association of Austrian Social Security Institutions collects pseudonymized claims data from Austrian social security institutions and information about hospital stays in a database for research purposes. For new studies the same data are repeatedly reprocessed and it is difficult to compare different study results even though the data is already preprocessed and prepared in a proprietar…	2019-09-07	314	10	43	Claims data	Austria		4	1	2	3	5	6		7
5IL3ZD7B	journalArticle	2021	Sathappan, Selva Muthu Kumaran; Jeon, Young Seok; Dang, Trung Kien; Lim, Su Chi; Shao, Yi-Ming; Tai, E. Shyong; Feng, Mengling	Transformation of Electronic Health Records and Questionnaire Data to OMOP CDM: A Feasibility Study Using SG_T2DM Dataset	Applied Clinical Informatics		1869-0327	10.1055/s-0041-1732301	BACKGROUND: Diabetes mellitus (DM) is an important public health concern in Singapore and places a massive burden on health care spending. Tackling chronic diseases such as DM requires innovative strategies to integrate patients' data from diverse sources and use scientific discovery to inform clinical practice that can help better manage the disease. The Observational Medical Outcomes Partnershi…	2021-08	757-767	4	12	Clinical data	South Korea	1				2	3	4	6	5
A2R9BX6F	journalArticle	2020	Michael, Chelsea L.; Sholle, Evan T.; Wulff, Regina T.; Roboz, Gail J.; Campion, Thomas R.	Mapping Local Biospecimen Records to the OMOP Common Data Model	AMIA Joint Summits on Translational Science proceedings. AMIA Joint Summits on Translational Science		2153-4063		Research to support precision medicine for leukemia patients requires integration of biospecimen and clinical data. The Observational Medical Outcomes Partnership common data model (OMOP CDM) and its Specimen table presents a potential solution. Although researchers have described progress and challenges in mapping electronic health record (EHR) data to populate the OMOP CDM, to our knowledge no …	2020	422-429		2020	Clinical data	USA	2		1		3	4	5
QW4T7RNE	journalArticle	2018	Hong, Na; Zhang, Ning; Wu, Huawei; Lu, Shanshan; Yu, Yue; Hou, Li; Lu, Yinying; Liu, Hongfang; Jiang, Guoqian	Preliminary exploration of survival analysis using the OHDSI common data model: a case study of intrahepatic cholangiocarcinoma	BMC medical informatics and decision making		1472-6947	10.1186/s12911-018-0686-7	BACKGROUND: Data heterogeneity is a common phenomenon related to the secondary use of electronic health records (EHR) data from different sources. The Observational Health Data Sciences and Informatics (OHDSI) Common Data Model (CDM) organizes healthcare data into standard data structures using concepts that are explicitly and formally specified through standard vocabularies, thereby facilitating…	2018-12-07	116	Suppl 5	18	Clinical data	China	1				2	3	4		5
P59W6CVT	journalArticle	2020	Lamer, Antoine; Depas, Nicolas; Doutreligne, Matthieu; Parrot, Adrien; Verloop, David; Defebvre, Marguerite-Marie; Ficheur, Grégoire; Chazard, Emmanuel; Beuscart, Jean-Baptiste	Transforming French Electronic Health Records into the Observational Medical Outcome Partnership's Common Data Model: A Feasibility Study	Applied Clinical Informatics		1869-0327	10.1055/s-0039-3402754	BACKGROUND: Common data models (CDMs) enable data to be standardized, and facilitate data exchange, sharing, and storage, particularly when the data have been collected via distinct, heterogeneous systems. Moreover, CDMs provide tools for data quality assessment, integration into models, visualization, and analysis. The observational medical outcome partnership (OMOP) provides a CDM for organizin…	2020-01	13-22	1	11	Claims data	France	1	2	3		4	5	6	8	7
895EVYA3	journalArticle	2021	Lenert, Leslie A.; Ilatovskiy, Andrey V.; Agnew, James; Rudisill, Patricia; Jacobs, Jeff; Weatherston, Duncan; Deans, Kenneth R.	Automated production of research data marts from a canonical fast healthcare interoperability resource data repository: applications to COVID-19 research	Journal of the American Medical Informatics Association: JAMIA		1527-974X	10.1093/jamia/ocab108	OBJECTIVE: The rapidly evolving COVID-19 pandemic has created a need for timely data from the healthcare systems for research. To meet this need, several large new data consortia have been developed that require frequent updating and sharing of electronic health record (EHR) data in different common data models (CDMs) to create multi-institutional databases for research. Traditionally, each CDM h…	2021-07-30	1605-1611	8	28	Clinical data	USA					1	2	3	5	4
TS29JT54	journalArticle	2023	Kohler, Severin; Boscá, Diego; Kärcher, Florian; Haarbrandt, Birger; Prinz, Manuel; Marschollek, Michael; Eils, Roland	Eos and OMOCL: Towards a seamless integration of openEHR records into the OMOP Common Data Model	Journal of Biomedical Informatics		1532-0480	10.1016/j.jbi.2023.104437	BACKGROUND: The reuse of data from electronic health records (EHRs) for research purposes promises to improve the data foundation for clinical trials and may even support to enable them. Nevertheless, EHRs are characterized by both, heterogeneous structure and semantics. To standardize this data for research, the Observational Medical Outcomes Partnership (OMOP) Common Data Model (CDM) standard h…	2023-07-12	104437		144	Clinical data	Germany					1	2	3	4
HPGCUZKE	journalArticle	2023	Oniani, David; Parmanto, Bambang; Saptono, Andi; Bove, Allyn; Freburger, Janet; Visweswaran, Shyam; Cappella, Nickie; McLay, Brian; Silverstein, Jonathan C.; Becich, Michael J.; Delitto, Anthony; Skidmore, Elizabeth; Wang, Yanshan	ReDWINE: A clinical datamart with text analytical capabilities to facilitate rehabilitation research	International Journal of Medical Informatics		1872-8243	10.1016/j.ijmedinf.2023.105144	Rehabilitation research focuses on determining the components of a treatment intervention, the mechanism of how these components lead to recovery and rehabilitation, and ultimately the optimal intervention strategies to maximize patients' physical, psychologic, and social functioning. Traditional randomized clinical trials that study and establish new interventions face challenges, such as high c…	2023-07-11	105144		177	Clinical data, claims data	USA	1				2	3	4	5	6
H4WFH4LE	journalArticle	2023	Frid, Santiago; Pastor Duran, Xavier; Bracons Cucó, Guillem; Pedrera-Jiménez, Miguel; Serrano-Balazote, Pablo; Muñoz Carrero, Adolfo; Lozano-Rubí, Raimundo	An Ontology-Based Approach for Consolidating Patient Data Standardized With European Norm/International Organization for Standardization 13606 (EN/ISO 13606) Into Joint Observational Medical Outcomes Partnership (OMOP) Repositories: Description of a Methodology	JMIR medical informatics		2291-9694	10.2196/44547	BACKGROUND: To discover new knowledge from data, they must be correct and in a consistent format. OntoCR, a clinical repository developed at Hospital Clínic de Barcelona, uses ontologies to represent clinical knowledge and map locally defined variables to health information standards and common data models. OBJECTIVE: The aim of the study is to design and implement a scalable methodology based on…	2023-03-08	e44547		11	Clinical data	Spain	1	2	3		4	5	6
Sum																15	9	16	8	23	23	23	15	11
Process step / sequence	1	2	3	4	5	6	7	8	9	Sum	Most frequent numbering(s)	Chronological order
ETL- process	0	0	0.130435	0.173913	0.304348	0.347826	0.0434783	0	0	23	6	7
Semantic mapping	0.0869565	0.130435	0.347826	0.26087	0.173913	0	0	0	0	23	3	5
Structural mapping	0	0.26087	0.130435	0.304348	0.26087	0.0434783	0	0	0	23	4	6
Vocabulary identification	0.3125	0.3125	0.3125	0.0625	0	0	0	0	0	16	1,2,3	3
Dataset specification	0.866667	0.133333	0	0	0	0	0	0	0	15	1	1
Qualitative data quality analysis	0	0	0	0.0666667	0.2	0.333333	0.266667	0.133333	0	15	6	8
Quantitative data quality analysis	0	0	0	0.0909091	0.181818	0.272727	0.181818	0.181818	0.0909091	11	6	9
Data profiling	0.333333	0.333333	0.222222	0.111111	0	0	0	0	0	9	1.2	2
Coverage analysis of vocabularies	0	0.5	0.25	0.25	0	0	0	0	0	8	2	4

## Sheet: Generic process
Type of source data / sequence	1	2	3	4	5	6	7	8	9
Clinical data	Dataset specification	Data profiling	Vocabulary identification	Coverage analysis of vocabularies	Structural mapping	Semantic mapping	ETL-process	Quantitative data quality analysis	Qualitative data quality analysis
Claims data	Dataset specification	Vocabulary identification	Coverage analysis of vocabularies	Data profiling	Semantic mapping	Structural mapping	ETL-process	Qualitative data quality analysis	Quantitative data quality analysis
Clinical data and/or claims data	Dataset specification	Data profiling	Vocabulary identification	Coverage analysis of vocabularies	Semantic mapping	Structural mapping	ETL-process	Qualitative data quality analysis	Quantitative data quality analysis
Generic data harmonization process	Dataset specification	Data profiling	Vocabulary identification	Coverage analysis of vocabularies	Semantic mapping	Structural mapping	ETL-process	Qualitative data quality analysis	Quantitative data quality analysis
